# Supplementary material for: Sociodemographic Determinants of Malnutrition in Rural and Urban Areas of Abia State, Nigeria: A Cross-Sectional Study
Source: Preprints.org preprint supplement (doi:10.20944/preprints202410.0642.v1), 2024-10-09
Supplement: Supplementary file 1 [file supplementary]

## Sheet: New_for Abia
LGA	AreaType	CaregiverAge	CaregiverAgeCode	MaritalStatusCode	YearsofMarriage	YearsofMarriageCode	HighestEducationCode	Occupation	OccupationStatus	OccupationCode	ChildAge	ChildAgeCode	ChildSex	PlaceofBirthCode	Childsweightkg	Childsheightcm	BMI	BMIforAge	BMIforAgeClass	BMIforAgeStatus	BMIforAgeStatusCode	MUAC	MalStatus	MalnutritionStatus	MalnutritionStatusCode	HeadCircumference	TotalKnowlwdgeScore	Per.Knowledge	Knowledgeindex	DietCode	DietCode_A	DietGrade	Prop.DietScore	DDS
Bende	2	47	3	2	16	2	2	Business	Self Employed	3	48	2	2	2	16	107	13.975	P25	Normal	Normal	1	15.5	Normal	Normal	2	20	17	0.85	2	5	High	3	0.833333	1
Bende	2	40	3	2	12	2	3	Farmer	Self Employed	3	8	1	2	2	6.3	65	14.9112	P10	Normal	Normal	1	14.5	Normal	Normal	2	17	19	0.95	2	2	Low	1	0.333333	2
Bende	2	33	2	2	13	2	2	Trader	Self Employed	3	24	1	2	2	9.5	81	14.4795	P25	Normal	Normal	1	14	Normal	Normal	2	19	17	0.85	2	5	High	3	0.833333	1
Bende	2	29	2	2	10	2	2	Business	Self Employed	3	15	1	1	2	10.2	71	20.2341	P999	Obese	Abnormal	2	15.5	Normal	Normal	2	18	19	0.95	2	5	High	3	0.833333	1
Bende	2	35	2	2	10	2	2	Trader	Self Employed	3	23	1	2	2	8	77	13.493	P5	Normal	Normal	1	12	MAM	GAM	1	18	15	0.75	2	1	Low	1	0.166667	2
Bende	2	33	2	1	9	1	2	Farmer	Self Employed	3	48	2	1	2	12.4	97	13.1789	P3	Underweight	Abnormal	2	14.5	Normal	Normal	2	19.5	17	0.85	2	5	High	3	0.833333	1
Bende	2	41	3	2	29	2	2	Unemployed	Unemployed	1	28	2	2	2	12	90	14.8148	P50	Normal	Normal	1	13.5	Normal	Normal	2	19	17	0.85	2	4	Medium	2	0.666667	2
Bende	2	35	2	2	6	1	2	Teacher	Employed	2	48	2	2	2	14	98	14.5773	P50	Normal	Normal	1	16	Normal	Normal	2	25	14	0.7	2	4	Medium	2	0.666667	2
Bende	2	22	1	2	3	1	2	Trader	Self Employed	3	15	1	1	1	8	75	14.2222	P5	Normal	Normal	1	12	MAM	GAM	1	17	14	0.7	2	1	Low	1	0.166667	2
Bende	2	28	2	2	3	1	2	Business	Self Employed	3	19	1	2	2	9.5	69	19.9538	P999	Obese	Abnormal	2	13.5	Normal	Normal	2	17.2	19	0.95	2	4	Medium	2	0.666667	2
Bende	2	33	2	2	12	2	2	Fashion Designer	Self Employed	3	39	2	2	2	10.3	91	12.4381	P1	Underweight	Abnormal	2	17	Normal	Normal	2	19	13	0.65	1	3	Medium	2	0.5	2
Bende	2	30	2	2	5	1	2	Farmer	Self Employed	3	36	2	1	2	9	75	16	P75	Normal	Normal	1	15	Normal	Normal	2	19	16	0.8	2	1	Low	1	0.166667	2
Bende	2	27	2	2	7	1	2	Teacher	Employed	2	6	1	1	2	6.7	73	12.5727	P01	Underweight	Abnormal	2	14	Normal	Normal	2	22	12	0.6	1	1	Low	1	0.166667	2
Bende	2	40	3	2	15	2	2	Trader	Self Employed	3	24	1	2	2	9	73	16.8887	P85	Overweight	Abnormal	2	12.5	MAM	GAM	1	18	17	0.85	2	1	Low	1	0.166667	2
Bende	2	24	1	2	5	1	2	Trader	Self Employed	3	6	1	1	2	6.8	78	11.1769	P01	Underweight	Abnormal	2	15	Normal	Normal	2	22.5	14	0.7	2	3	Medium	2	0.5	2
Bende	2	40	3	2	24	2	2	Nurse	Employed	2	50	2	2	2	13	91	15.6986	P75	Normal	Normal	1	18	Normal	Normal	2	24	13	0.65	1	3	Medium	2	0.5	2
Bende	2	29	2	2	6	1	2	Farmer	Self Employed	3	24	1	1	2	14	83	20.3223	P999	Obese	Abnormal	2	13.5	Normal	Normal	2	20	15	0.75	2	1	Low	1	0.166667	2
Bende	2	25	2	2	4	1	2	Farmer	Self Employed	3	38	2	1	2	14.5	95	16.0665	P75	Normal	Normal	1	15.5	Normal	Normal	2	27.5	10	0.5	1	5	High	3	0.833333	1
Bende	2	22	1	1	NA	#NULL!	1	Hair Stylist	Self Employed	3	14	1	2	1	10	77	16.8663	P75	Normal	Normal	1	17.5	Normal	Normal	2	19	15	0.75	2	3	Medium	2	0.5	2
Bende	2	24	1	2	9	1	2	Hair Stylist	Self Employed	3	24	1	2	1	8	70	16.3265	P75	Normal	Normal	1	15.5	Normal	Normal	2	19.5	16	0.8	2	4	Medium	2	0.666667	2
Bende	2	23	1	1	NA	#NULL!	2	Business	Self Employed	3	48	2	1	2	10.5	103	9.89726	P01	Underweight	Abnormal	2	18	Normal	Normal	2	20	13	0.65	1	4	Medium	2	0.666667	2
Bende	2	35	2	2	15	2	2	Business	Self Employed	3	30	2	1	2	15	67	33.415	P999	Obese	Abnormal	2	18	Normal	Normal	2	19.4	17	0.85	2	6	High	3	1	1
Bende	2	33	2	2	10	2	2	Student	Unemployed	1	48	2	1	2	18	105	16.3265	P85	Overweight	Abnormal	2	18.5	Normal	Normal	2	19.5	16	0.8	2	5	High	3	0.833333	1
Bende	2	20	1	1	NA	#NULL!	2	Fashion Designer	Self Employed	3	22	1	1	2	11	71	21.8211	P999	Obese	Abnormal	2	13.9	Normal	Normal	2	24	11	0.55	1	4	Medium	2	0.666667	2
Bende	2	61	3	2	12	2	2	Farmer	Self Employed	3	29	2	1	2	13	85	17.9931	P95	Obese	Abnormal	2	18.5	Normal	Normal	2	19.5	14	0.7	2	6	High	3	1	1
Bende	2	35	2	2	7	1	2	Farmer	Self Employed	3	18	1	1	1	6	70	12.2449	P01	Underweight	Abnormal	2	11.5	MAM	GAM	1	18	12	0.6	1	1	Low	1	0.166667	2
Bende	2	25	2	2	5	1	2	Fashion Designer	Self Employed	3	56	2	2	2	17	104	15.7175	P75	Normal	Normal	1	15.6	Normal	Normal	2	26	12	0.6	1	3	Medium	2	0.5	2
Bende	2	24	1	2	3	1	2	Trader	Self Employed	3	36	2	1	2	14	90	17.284	P90	Overweight	Abnormal	2	15	Normal	Normal	2	19.5	12	0.6	1	1	Low	1	0.166667	2
Bende	2	35	2	2	13	2	2	Marketer	Self Employed	3	50	2	1	2	19	104	17.5666	P95	Obese	Abnormal	2	16.1	Normal	Normal	2	25.2	10	0.5	1	5	High	3	0.833333	1
Bende	2	30	2	2	5	1	2	Business	Self Employed	3	48	2	1	2	21	113	16.4461	P85	Overweight	Abnormal	2	17.3	Normal	Normal	2	27	11	0.55	1	5	High	3	0.833333	1
Bende	2	31	2	2	15	2	2	Trader	Self Employed	3	12	1	1	2	9	75	16	P50	Normal	Normal	1	15	Normal	Normal	2	18	11	0.55	1	1	Low	1	0.166667	2
Bende	2	35	2	1	NA	#NULL!	2	Trader	Self Employed	3	7	1	1	2	0.95	66	2.1809	P01	Underweight	Abnormal	2	9.2	SAM	GAM	1	21	12	0.6	1	1	Low	1	0.166667	2
Bende	2	32	2	2	14	2	2	Farmer	Self Employed	3	42	2	2	2	15	101	14.7044	P50	Normal	Normal	1	15.5	Normal	Normal	2	15	15	0.75	2	1	Low	1	0.166667	2
Bende	2	31	2	2	2	1	2	Trader	Self Employed	3	19	1	2	2	10	76	17.313	P90	Overweight	Abnormal	2	15.1	Normal	Normal	2	24	12	0.6	1	4	Medium	2	0.666667	2
Bende	2	42	3	2	10	2	3	Building	Self Employed	3	48	2	2	2	14	96	15.191	P50	Normal	Normal	1	14.5	Normal	Normal	2	19	12	0.6	1	3	Medium	2	0.5	2
Bende	2	35	2	2	2	1	2	Teacher	Employed	2	6	1	2	2	10.5	60	29.1667	P999	Obese	Abnormal	2	13	Normal	Normal	2	19	12	0.6	1	1	Low	1	0.166667	2
Bende	2	18	1	1	NA	#NULL!	2	Farmer	Self Employed	3	6	1	2	2	0.45	63	1.13379	P01	Underweight	Abnormal	2	12	MAM	GAM	1	21	15	0.75	2	5	High	3	0.833333	1
Bende	2	29	2	2	2	1	2	Trader	Self Employed	3	9	1	1	2	9	63	22.6757	P999	Obese	Abnormal	2	15.5	Normal	Normal	2	24	15	0.75	2	6	High	3	1	1
Bende	2	23	1	1	NA	#NULL!	2	Trader	Self Employed	3	9	1	1	2	10	80	15.625	P15	Normal	Normal	1	14	Normal	Normal	2	24	16	0.8	2	6	High	3	1	1
Bende	2	35	2	2	12	2	2	Trader	Self Employed	3	48	2	1	2	16	105	14.5125	P50	Normal	Normal	1	16	Normal	Normal	2	26	16	0.8	2	6	High	3	1	1
Bende	2	45	3	2	20	2	2	Hair Stylist	Self Employed	3	51	2	1	2	16	102	15.3787	P75	Normal	Normal	1	15.5	Normal	Normal	2	25.4	17	0.85	2	6	High	3	1	1
Bende	2	26	2	1	NA	#NULL!	2	Trader	Self Employed	3	18	1	1	2	10	77	16.8663	P75	Normal	Normal	1	14	Normal	Normal	2	24	16	0.8	2	6	High	3	1	1
Bende	2	28	2	1	4	1	2	Farmer	Self Employed	3	23	1	2	2	10	82	14.8721	P50	Normal	Normal	1	14	Normal	Normal	2	24	16	0.8	2	6	High	3	1	1
Bende	2	24	1	1	NA	#NULL!	1	Trader	Self Employed	3	24	1	1	2	10	85	13.8408	P3	Underweight	Abnormal	2	13	Normal	Normal	2	24	17	0.85	2	6	High	3	1	1
Bende	2	56	3	2	8	1	2	Trader	Self Employed	3	24	1	1	2	10	79	16.0231	P75	Normal	Normal	1	15.5	Normal	Normal	2	25	15	0.75	2	6	High	3	1	1
Bende	2	65	3	1	NA	#NULL!	1	Trader	Self Employed	3	58	2	1	2	18	106	16.0199	P75	Normal	Normal	1	17.5	Normal	Normal	2	24	15	0.75	2	6	High	3	1	1
Bende	2	34	2	2	9	1	2	Farmer	Self Employed	3	48	2	2	2	14	104	12.9438	P5	Normal	Normal	1	14.8	Normal	Normal	2	24	16	0.8	2	6	High	3	1	1
Bende	2	26	2	2	3	1	2	Farmer	Self Employed	3	23	1	1	2	10	86	13.5208	P3	Underweight	Abnormal	2	15.5	Normal	Normal	2	46	17	0.85	2	4	Medium	2	0.666667	2
Bende	2	28	2	1	3	1	2	Business	Self Employed	3	21	1	2	2	10	73	18.7652	P99	Obese	Abnormal	2	14	Normal	Normal	2	48	15	0.75	2	3	Medium	2	0.5	2
Bende	2	22	1	2	7	1	2	Business	Self Employed	3	9	1	2	2	7.35	71	14.5804	P10	Normal	Normal	1	14	Normal	Normal	2	48	17	0.85	2	3	Medium	2	0.5	2
Bende	2	36	3	2	9	1	2	Business	Self Employed	3	11	1	2	1	8.15	81	12.4219	P01	Underweight	Abnormal	2	14	Normal	Normal	2	47	17	0.85	2	4	Medium	2	0.666667	2
Bende	2	24	1	2	2	1	2	Pensioner	Unemployed	1	20	1	1	1	10	73	18.7652	P99	Obese	Abnormal	2	14.5	Normal	Normal	2	47	18	0.9	2	4	Medium	2	0.666667	2
Bende	2	89	3	2	45	2	2	Business	Self Employed	3	48	2	2	2	15	93	17.343	P95	Obese	Abnormal	2	15.5	Normal	Normal	2	47	14	0.7	2	3	Medium	2	0.5	2
Bende	2	23	1	2	4	1	2	Business	Self Employed	3	45	2	1	2	15	91	18.1138	P99	Obese	Abnormal	2	17	Normal	Normal	2	48	15	0.75	2	5	High	3	0.833333	1
Bende	2	30	2	1	13	2	2	Business	Self Employed	3	13	1	2	1	9.5	73	17.827	P90	Overweight	Abnormal	2	14	Normal	Normal	2	47	17	0.85	2	4	Medium	2	0.666667	2
Bende	2	22	1	2	3	1	2	Business	Self Employed	3	28	2	1	2	15	91	18.1138	P97	Obese	Abnormal	2	15	Normal	Normal	2	49	16	0.8	2	4	Medium	2	0.666667	2
Bende	2	37	3	2	13	2	2	Farmer	Self Employed	3	48	2	2	2	15	99	15.3046	P75	Normal	Normal	1	15.5	Normal	Normal	2	50	17	0.85	2	4	Medium	2	0.666667	2
Bende	2	24	1	2	3	1	2	Trader	Self Employed	3	24	1	2	2	10	88	12.9132	P1	Underweight	Abnormal	2	14	Normal	Normal	2	23.5	16	0.8	2	6	High	3	1	1
Bende	2	28	2	2	8	1	2	Farmer	Self Employed	3	20	1	2	2	10	75	17.7778	P95	Obese	Abnormal	2	13	Normal	Normal	2	23	16	0.8	2	6	High	3	1	1
Bende	2	40	3	2	15	2	2	Business	Self Employed	3	48	2	1	2	16	107	13.975	P15	Normal	Normal	1	15	Normal	Normal	2	25	16	0.8	2	6	High	3	1	1
Bende	2	24	1	2	2	1	2	Business	Self Employed	3	36	2	1	2	10	86	13.5208	P5	Normal	Normal	1	13.5	Normal	Normal	2	20.5	14	0.7	2	2	Low	1	0.333333	2
Bende	2	18	1	1	NA	#NULL!	2	Business	Self Employed	3	22	1	1	2	10	87	13.2118	P1	Underweight	Abnormal	2	15	Normal	Normal	2	24.5	13	0.65	1	3	Medium	2	0.5	2
Bende	2	26	2	2	2	1	2	Business	Self Employed	3	18	1	1	2	9	75	16	P50	Normal	Normal	1	12	MAM	GAM	1	23	15	0.75	2	4	Medium	2	0.666667	2
Bende	2	26	2	2	5	1	2	Business	Self Employed	3	22	1	2	2	10	79	16.0231	P75	Normal	Normal	1	14.5	Normal	Normal	2	25.5	15	0.75	2	1	Low	1	0.166667	2
Bende	2	55	3	2	40	2	1	Business	Self Employed	3	24	1	2	2	14	88	18.0785	P95	Obese	Abnormal	2	15	Normal	Normal	2	24.5	16	0.8	2	1	Low	1	0.166667	2
Bende	2	34	2	2	1	1	2	Business	Self Employed	3	20	1	2	2	10	80	15.625	P75	Normal	Normal	1	14.1	Normal	Normal	2	20.5	13	0.65	1	1	Low	1	0.166667	2
Bende	2	32	2	2	5	1	2	Business	Self Employed	3	31	2	2	2	13	91	15.6986	P75	Normal	Normal	1	16	Normal	Normal	2	25.1	14	0.7	2	2	Low	1	0.333333	2
Bende	2	21	1	2	6	1	2	Business	Self Employed	3	27	2	1	2	11	85	15.2249	P50	Normal	Normal	1	15.5	Normal	Normal	2	25.5	18	0.9	2	1	Low	1	0.166667	2
Bende	2	26	2	2	10	2	2	Business	Self Employed	3	18	1	1	2	12	79	19.2277	P99	Obese	Abnormal	2	16	Normal	Normal	2	24	15	0.75	2	2	Low	1	0.333333	2
Bende	2	35	2	2	28	2	2	Farmer	Self Employed	3	43	2	1	2	16	106	14.2399	P25	Normal	Normal	1	17	Normal	Normal	2	26.5	14	0.7	2	1	Low	1	0.166667	2
Bende	2	45	3	2	25	2	2	Business	Self Employed	3	53	2	1	2	13	99	13.264	P5	Normal	Normal	1	15.5	Normal	Normal	2	33	17	0.85	2	1	Low	1	0.166667	2
Bende	2	26	2	2	6	1	2	Trader	Self Employed	3	7	1	2	2	7.6	70	15.5102	P25	Normal	Normal	1	14	Normal	Normal	2	21.5	15	0.75	2	2	Low	1	0.333333	2
Bende	2	59	3	1	NA	#NULL!	1	Farmer	Self Employed	3	14	1	2	2	6	42	34.0136	P999	Obese	Abnormal	2	14	Normal	Normal	2	24	16	0.8	2	5	High	3	0.833333	1
Bende	2	44	3	2	5	1	2	Trader	Self Employed	3	36	2	1	2	15	94	16.976	P85	Overweight	Abnormal	2	16	Normal	Normal	2	25	16	0.8	2	4	Medium	2	0.666667	2
Bende	2	60	3	1	NA	#NULL!	1	Farmer	Self Employed	3	36	2	1	2	16	92	18.9036	P999	Obese	Abnormal	2	17	Normal	Normal	2	25	15	0.75	2	5	High	3	0.833333	1
Bende	2	36	3	2	10	2	2	Farmer	Self Employed	3	47	2	2	2	16	98	16.6597	P85	Overweight	Abnormal	2	14	Normal	Normal	2	24	15	0.75	2	5	High	3	0.833333	1
Bende	2	35	2	2	12	2	2	Trader	Self Employed	3	7	1	2	2	5.68	63	14.3109	P5	Normal	Normal	1	13	Normal	Normal	2	21	17	0.85	2	5	High	3	0.833333	1
Bende	2	45	3	2	5	1	1	Hair Stylist	Self Employed	3	12	1	2	1	10	79	16.0231	P50	Normal	Normal	1	14	Normal	Normal	2	24	15	0.75	2	5	High	3	0.833333	1
Bende	2	35	2	2	12	2	1	Farmer	Self Employed	3	35	2	2	2	16	98	16.6597	P85	Overweight	Abnormal	2	16	Normal	Normal	2	24	14	0.7	2	5	High	3	0.833333	1
Bende	2	31	2	2	14	2	2	Farmer	Self Employed	3	38	2	1	2	14	107	12.2281	P01	Underweight	Abnormal	2	15	Normal	Normal	2	25	14	0.7	2	5	High	3	0.833333	1
Bende	2	59	3	2	25	2	1	Farmer	Self Employed	3	58	2	1	2	14	105	12.6984	P3	Underweight	Abnormal	2	14	Normal	Normal	2	25	15	0.75	2	5	High	3	0.833333	1
Bende	2	45	3	2	6	1	2	Teacher	Employed	2	48	2	1	2	15	109	12.6252	P1	Underweight	Abnormal	2	16.5	Normal	Normal	2	25	14	0.7	2	5	High	3	0.833333	1
Bende	2	27	2	1	NA	#NULL!	2	Trader	Self Employed	3	48	2	2	2	14	106	12.46	P1	Underweight	Abnormal	2	15	Normal	Normal	2	25	12	0.6	1	5	High	3	0.833333	1
Bende	2	40	3	2	5	1	2	Trader	Self Employed	3	11	1	2	2	6	70	12.2449	P01	Underweight	Abnormal	2	14	Normal	Normal	2	22	15	0.75	2	5	High	3	0.833333	1
Bende	2	41	3	2	13	2	1	Farmer	Self Employed	3	24	1	2	1	13	81	19.8141	P999	Obese	Abnormal	2	18	Normal	Normal	2	48	18	0.9	2	1	Low	1	0.166667	2
Bende	2	23	1	2	4	1	2	Trader	Self Employed	3	53	2	1	2	16	106	14.2399	P25	Normal	Normal	1	15	Normal	Normal	2	18.2	10	0.5	1	2	Low	1	0.333333	2
Bende	2	32	2	2	13	2	2	Trader	Self Employed	3	57	2	1	2	12	90	14.8148	P50	Normal	Normal	1	14	Normal	Normal	2	18	11	0.55	1	3	Medium	2	0.5	2
Bende	2	23	1	2	3	1	2	Fashion Designer	Self Employed	3	26	2	2	2	10	80	15.625	P75	Normal	Normal	1	14.5	Normal	Normal	2	17	13	0.65	1	2	Low	1	0.333333	2
Bende	2	36	3	2	22	2	2	Farmer	Self Employed	3	23	1	1	2	10	81	15.2416	P50	Normal	Normal	1	13	Normal	Normal	2	19.5	12	0.6	1	2	Low	1	0.333333	2
Bende	2	35	2	2	9	1	2	Student	Unemployed	1	36	2	2	2	14	90	17.284	P95	Obese	Abnormal	2	15	Normal	Normal	2	19	9	0.45	1	2	Low	1	0.333333	2
Bende	2	28	2	2	10	2	2	Farmer	Self Employed	3	6	1	2	2	6	63	15.1172	P15	Normal	Normal	1	10	SAM	GAM	1	16	8	0.4	1	2	Low	1	0.333333	2
Bende	2	28	2	2	7	1	2	Farmer	Self Employed	3	36	2	1	2	14	90	17.284	P90	Overweight	Abnormal	2	15	Normal	Normal	2	19.3	10	0.5	1	2	Low	1	0.333333	2
Bende	2	36	3	2	22	2	2	Farmer	Self Employed	3	6	1	1	2	5.9	67	13.1432	P01	Underweight	Abnormal	2	13.5	Normal	Normal	2	17.8	10	0.5	1	1	Low	1	0.166667	2
Bende	2	33	2	2	14	2	2	Housewife	Unemployed	1	11	1	2	2	10	74	18.2615	P90	Overweight	Abnormal	2	14	Normal	Normal	2	18	11	0.55	1	2	Low	1	0.333333	2
Bende	2	35	2	2	15	2	2	Trader	Self Employed	3	48	2	2	2	10	92	11.8147	P1	Underweight	Abnormal	2	15	Normal	Normal	2	18.2	12	0.6	1	2	Low	1	0.333333	2
Bende	2	57	3	1	NA	#NULL!	2	Business	Self Employed	3	52	2	2	2	15	99	15.3046	P75	Normal	Normal	1	18	Normal	Normal	2	19	17	0.85	2	3	Medium	2	0.5	2
Bende	2	25	2	2	2	1	2	Fashion Designer	Self Employed	3	8	1	2	2	7.4	66.5	16.7336	P50	Normal	Normal	1	15	Normal	Normal	2	17.5	14	0.7	2	3	Medium	2	0.5	2
Bende	2	35	2	2	16	2	2	Fashion Designer	Self Employed	3	19	1	1	2	12	78	19.7239	P999	Obese	Abnormal	2	18	Normal	Normal	2	18.7	16	0.8	2	4	Medium	2	0.666667	2
Bende	2	25	2	2	8	1	2	Farmer	Self Employed	3	14	1	2	2	10	67	22.2767	P999	Obese	Abnormal	2	18	Normal	Normal	2	18	15	0.75	2	4	Medium	2	0.666667	2
Bende	2	25	2	1	8	1	2	Farmer	Self Employed	3	24	1	1	1	8	72	15.4321	P50	Normal	Normal	1	13.5	Normal	Normal	2	18	16	0.8	2	3	Medium	2	0.5	2
Bende	2	36	3	2	9	1	2	Trader	Self Employed	3	36	2	1	2	11	88	14.2045	P15	Normal	Normal	1	17	Normal	Normal	2	19.5	15	0.75	2	5	High	3	0.833333	1
Bende	2	27	2	2	8	1	1	Trader	Self Employed	3	48	2	2	2	15	100	15	P50	Normal	Normal	1	16	Normal	Normal	2	18.5	12	0.6	1	2	Low	1	0.333333	2
Bende	2	37	3	2	15	2	2	Unemployed	Unemployed	1	36	2	2	2	19	89	23.9869	P999	Obese	Abnormal	2	16	Normal	Normal	2	19.1	11	0.55	1	2	Low	1	0.333333	2
Bende	2	30	2	2	10	2	2	Farmer	Self Employed	3	48	2	1	2	18	94	20.3712	P999	Obese	Abnormal	2	13	Normal	Normal	2	18	9	0.45	1	2	Low	1	0.333333	2
Bende	2	40	3	2	20	2	2	Farmer	Self Employed	3	6	1	2	2	8.57	68	18.5337	P85	Overweight	Abnormal	2	13.5	Normal	Normal	2	16.3	10	0.5	1	2	Low	1	0.333333	2
Bende	2	35	2	2	15	2	2	Farmer	Self Employed	3	48	2	1	2	19	105	17.2336	P95	Obese	Abnormal	2	15.5	Normal	Normal	2	20	10	0.5	1	2	Low	1	0.333333	2
Bende	2	30	2	2	8	1	2	Trader	Self Employed	3	19	1	1	2	10	74	18.2615	P95	Obese	Abnormal	2	14	Normal	Normal	2	24.5	16	0.8	2	5	High	3	0.833333	1
Bende	2	30	2	2	10	2	2	Trader	Self Employed	3	9	1	1	2	8	72	15.4321	P10	Normal	Normal	1	15	Normal	Normal	2	24	15	0.75	2	5	High	3	0.833333	1
Bende	2	18	1	2	5	1	2	Trader	Self Employed	3	14	1	2	1	9	73	16.8887	P75	Normal	Normal	1	12.2	MAM	GAM	1	22	14	0.7	2	5	High	3	0.833333	1
Bende	2	27	2	2	2	1	2	Trader	Self Employed	3	8	1	1	2	7	70	14.2857	P1	Underweight	Abnormal	2	13	Normal	Normal	2	23	15	0.75	2	5	High	3	0.833333	1
Bende	2	23	1	2	1	1	2	Trader	Self Employed	3	7	1	2	2	6	69	12.6024	P01	Underweight	Abnormal	2	14.2	Normal	Normal	2	22	13	0.65	1	5	High	3	0.833333	1
Bende	2	30	2	2	10	2	2	Trader	Self Employed	3	20	1	1	1	9	78	14.7929	P15	Normal	Normal	1	13.5	Normal	Normal	2	24.5	14	0.7	2	5	High	3	0.833333	1
Bende	2	38	3	2	12	2	2	Farmer	Self Employed	3	10	1	2	1	9.5	79	15.2219	P25	Normal	Normal	1	13.3	Normal	Normal	2	24.5	13	0.65	1	5	High	3	0.833333	1
Bende	2	40	3	1	NA	#NULL!	2	Hair Stylist	Self Employed	3	43	2	2	1	16	105	14.5125	P50	Normal	Normal	1	16	Normal	Normal	2	25	16	0.8	2	5	High	3	0.833333	1
Bende	2	22	1	1	NA	#NULL!	2	Housewife	Unemployed	1	27	2	2	2	8	80	12.5	P1	Underweight	Abnormal	2	13.5	Normal	Normal	2	24	16	0.8	2	5	High	3	0.833333	1
Bende	2	23	1	2	4	1	2	Unemployed	Unemployed	1	48	2	1	2	18	103	16.9667	P90	Overweight	Abnormal	2	17.5	Normal	Normal	2	19.5	16	0.8	2	4	Medium	2	0.666667	2
Bende	2	25	2	1	NA	#NULL!	2	Unemployed	Unemployed	1	26	2	2	2	14	90	17.284	P90	Overweight	Abnormal	2	17.5	Normal	Normal	2	19	15	0.75	2	5	High	3	0.833333	1
Bende	2	31	2	2	5	1	2	STUDENT	Unemployed	1	48	2	2	2	12	95	13.2964	P10	Normal	Normal	1	16	Normal	Normal	2	18	17	0.85	2	5	High	3	0.833333	1
Bende	2	23	1	2	2	1	2	Trader	Self Employed	3	7	1	1	2	8	59	22.9819	P999	Obese	Abnormal	2	15	Normal	Normal	2	17	17	0.85	2	1	Low	1	0.166667	2
Bende	2	29	2	2	8	1	2	Trader	Self Employed	3	48	2	2	2	14	94	15.8443	P75	Normal	Normal	1	17	Normal	Normal	2	19	17	0.85	2	5	High	3	0.833333	1
Bende	2	34	2	2	2	1	1	Farmer	Self Employed	3	10	1	2	2	4	47	18.1077	P85	Overweight	Abnormal	2	12	MAM	GAM	1	15	15	0.75	2	1	Low	1	0.166667	2
Bende	2	30	2	2	12	2	2	Trader	Self Employed	3	54	2	2	1	17	109	14.3086	P50	Normal	Normal	1	17	Normal	Normal	2	25.5	14	0.7	2	6	High	3	1	1
Bende	2	23	1	2	3	1	2	Trader	Self Employed	3	7	1	1	1	8	65	18.9349	P90	Overweight	Abnormal	2	14	Normal	Normal	2	22	7	0.35	1	6	High	3	1	1
Bende	2	38	3	2	7	1	2	Farmer	Self Employed	3	6	1	1	2	10	65	23.6686	P999	Obese	Abnormal	2	16	Normal	Normal	2	22	11	0.55	1	5	High	3	0.833333	1
Bende	2	48	3	2	18	2	2	Hair Stylist	Self Employed	3	41	2	1	2	14	91	16.9062	P90	Overweight	Abnormal	2	16	Normal	Normal	2	25	11	0.55	1	5	High	3	0.833333	1
Bende	2	27	2	1	NA	#NULL!	2	Business	Self Employed	3	16	1	1	1	6	76	10.3878	P01	Underweight	Abnormal	2	12.5	MAM	GAM	1	23	15	0.75	2	1	Low	1	0.166667	2
Bende	2	32	2	2	4	1	2	Business	Self Employed	3	14	1	1	2	8.5	79	13.6196	P1	Underweight	Abnormal	2	16	Normal	Normal	2	24	14	0.7	2	1	Low	1	0.166667	2
Bende	2	39	3	2	8	1	3	Fashion Designer	Self Employed	3	36	2	2	2	15	99	15.3046	P50	Normal	Normal	1	15	Normal	Normal	2	25.5	14	0.7	2	1	Low	1	0.166667	2
Bende	2	39	3	2	10	2	2	Business	Self Employed	3	42	2	1	2	15	100	15	P50	Normal	Normal	1	15	Normal	Normal	2	23	14	0.7	2	1	Low	1	0.166667	2
Bende	2	36	3	2	1	1	2	Computer business	Self Employed	3	31	2	2	2	16	99	16.3249	P75	Normal	Normal	1	16.2	Normal	Normal	2	25.1	13	0.65	1	2	Low	1	0.333333	2
Bende	2	32	2	2	3	1	3	Computer business	Self Employed	3	34	2	1	2	13	93	15.0306	P50	Normal	Normal	1	16.5	Normal	Normal	2	25	16	0.8	2	1	Low	1	0.166667	2
Bende	2	23	1	2	3	1	2	Hair Stylist	Self Employed	3	20	1	1	2	10	74	18.2615	P95	Obese	Abnormal	2	13.5	Normal	Normal	2	23	13	0.65	1	1	Low	1	0.166667	2
Bende	2	21	1	1	NA	#NULL!	2	Fashion Designer	Self Employed	3	12	1	2	2	8.2	59	23.5564	P999	Obese	Abnormal	2	14	Normal	Normal	2	22.5	13	0.65	1	1	Low	1	0.166667	2
Bende	2	26	2	2	13	2	2	Trader	Self Employed	3	57	2	2	2	18	103	16.9667	P90	Overweight	Abnormal	2	15.7	Normal	Normal	2	25	12	0.6	1	1	Low	1	0.166667	2
Bende	2	59	3	2	15	2	2	Trader	Self Employed	3	48	2	1	2	18	109	15.1502	P50	Normal	Normal	1	17.5	Normal	Normal	2	26	11	0.55	1	5	High	3	0.833333	1
Bende	2	33	2	2	14	2	2	Fashion Designer	Self Employed	3	52	2	2	2	16	108	13.7174	P15	Normal	Normal	1	15.5	Normal	Normal	2	24.5	14	0.7	2	5	High	3	0.833333	1
Bende	2	46	3	1	NA	#NULL!	2	Hair Stylist	Self Employed	3	13	1	1	2	10	64	24.4141	P999	Obese	Abnormal	2	13	Normal	Normal	2	23	12	0.6	1	4	Medium	2	0.666667	2
Bende	2	23	1	2	4	1	2	Farmer	Self Employed	3	40	2	1	2	16	96	17.3611	P95	Obese	Abnormal	2	15	Normal	Normal	2	24.5	10	0.5	1	5	High	3	0.833333	1
Bende	2	27	2	2	10	2	2	Farmer	Self Employed	3	34	2	1	1	15	80	23.4375	P999	Obese	Abnormal	2	15	Normal	Normal	2	25	12	0.6	1	4	Medium	2	0.666667	2
Bende	2	45	3	1	4	1	2	Business	Self Employed	3	24	1	2	1	13	72	25.0772	P999	Obese	Abnormal	2	13	Normal	Normal	2	24	14	0.7	2	5	High	3	0.833333	1
Bende	2	28	2	2	7	1	2	Business	Self Employed	3	9	1	1	2	8	75	14.2222	P1	Underweight	Abnormal	2	14	Normal	Normal	2	23.5	12	0.6	1	1	Low	1	0.166667	2
Bende	2	34	2	2	4	1	1	Business	Self Employed	3	12	1	2	2	3	69	6.3012	P01	Underweight	Abnormal	2	10	SAM	GAM	1	21.5	10	0.5	1	1	Low	1	0.166667	2
Bende	2	24	1	2	4	1	2	Teacher	Employed	2	16	1	1	2	9	75	16	P50	Normal	Normal	1	11.9	MAM	GAM	1	23.5	13	0.65	1	1	Low	1	0.166667	2
Bende	2	27	2	2	5	1	2	Farmer	Self Employed	3	6	1	1	2	9	77	15.1796	P5	Normal	Normal	1	15.5	Normal	Normal	2	22.5	16	0.8	2	1	Low	1	0.166667	2
Bende	2	28	2	2	4	1	2	Trader	Self Employed	3	6	1	1	1	6.5	66	14.9219	P5	Normal	Normal	1	13	Normal	Normal	2	21.5	11	0.55	1	1	Low	1	0.166667	2
Bende	2	34	2	2	10	2	2	Farmer	Self Employed	3	7	1	2	2	8	67	17.8213	P75	Normal	Normal	1	13	Normal	Normal	2	22	13	0.65	1	5	High	3	0.833333	1
Bende	2	36	3	2	8	1	2	Trader	Self Employed	3	10	1	1	2	10	69	21.004	P999	Obese	Abnormal	2	15.5	Normal	Normal	2	22.7	14	0.7	2	6	High	3	1	1
Bende	2	35	2	2	12	2	2	Business	Self Employed	3	57	2	1	2	16	104	14.7929	P50	Normal	Normal	1	16.5	Normal	Normal	2	24	13	0.65	1	6	High	3	1	1
Bende	2	28	2	2	9	1	2	Business	Self Employed	3	24	1	1	2	13	81	19.8141	P999	Obese	Abnormal	2	1.7	SAM	GAM	1	51	17	0.85	2	3	Medium	2	0.5	2
Bende	2	37	3	2	13	2	2	Farmer	Self Employed	3	22	1	2	2	1	76	1.7313	P01	Underweight	Abnormal	2	1.3	SAM	GAM	1	46	18	0.9	2	5	High	3	0.833333	1
Bende	2	21	1	2	2	1	1	Farmer	Self Employed	3	11	1	1	2	7.23	74	13.2031	P01	Underweight	Abnormal	2	1.2	SAM	GAM	1	43	17	0.85	2	3	Medium	2	0.5	2
Bende	2	34	2	2	3	1	2	Shoemaker	Self Employed	3	31	2	2	2	10	80	15.625	P75	Normal	Normal	1	1.5	SAM	GAM	1	44	18	0.9	2	4	Medium	2	0.666667	2
Bende	2	28	2	1	NA	#NULL!	2	Decorator	Self Employed	3	43	2	2	1	15	93	17.343	P95	Obese	Abnormal	2	1.6	SAM	GAM	1	48	17	0.85	2	3	Medium	2	0.5	2
Bende	2	38	3	2	9	1	2	Decorator	Self Employed	3	36	2	1	2	14	92	16.5406	P85	Overweight	Abnormal	2	1.45	SAM	GAM	1	5	16	0.8	2	5	High	3	0.833333	1
Bende	2	68	3	1	NA	#NULL!	1	Farmer	Self Employed	3	58	2	2	1	12	91	14.491	P50	Normal	Normal	1	1.15	SAM	GAM	1	5	15	0.75	2	4	Medium	2	0.666667	2
Bende	2	36	3	2	13	2	2	Student	Unemployed	1	24	1	1	2	10	79	16.0231	P75	Normal	Normal	1	1.25	SAM	GAM	1	48	18	0.9	2	4	Medium	2	0.666667	2
Bende	2	15	1	1	NA	#NULL!	2	Business	Self Employed	3	36	2	2	1	15	95	16.6205	P85	Overweight	Abnormal	2	1.55	SAM	GAM	1	5	13	0.65	1	4	Medium	2	0.666667	2
Bende	2	33	2	2	9	1	2	Business	Self Employed	3	48	2	1	2	14	89	17.6745	P97	Obese	Abnormal	2	1.45	SAM	GAM	1	5	18	0.9	2	2	Low	1	0.333333	2
Bende	2	61	3	1	NA	#NULL!	1	Painting	Self Employed	3	23	1	2	2	10	86	13.5208	P10	Normal	Normal	1	1.35	SAM	GAM	1	48	17	0.85	2	5	High	3	0.833333	1
Bende	2	40	3	2	20	2	2	Business	Self Employed	3	57	2	1	2	20	113	15.6629	P75	Normal	Normal	1	20	Normal	Normal	2	26	14	0.7	2	6	High	3	1	1
Bende	2	29	2	2	6	1	2	Nurse	Employed	2	43	2	2	2	16	89	20.1995	P999	Obese	Abnormal	2	13	Normal	Normal	2	19	13	0.65	1	2	Low	1	0.333333	2
Bende	2	40	3	2	15	2	2	Trader	Self Employed	3	17	1	2	2	10	78	16.4366	P75	Normal	Normal	1	13.5	Normal	Normal	2	18	11	0.55	1	2	Low	1	0.333333	2
Bende	2	40	3	2	22	2	2	Trader	Self Employed	3	7	1	1	2	10	67	22.2767	P999	Obese	Abnormal	2	14	Normal	Normal	2	18.5	16	0.8	2	5	High	3	0.833333	1
Bende	2	34	2	2	15	2	2	Oil Dealer	Self Employed	3	19	1	1	2	9	64	21.9727	P999	Obese	Abnormal	2	13	Normal	Normal	2	17	17	0.85	2	3	Medium	2	0.5	2
Bende	2	27	2	2	6	1	2	Hair Stylist	Self Employed	3	25	2	2	2	10	79	16.0231	P75	Normal	Normal	1	17.5	Normal	Normal	2	15	16	0.8	2	4	Medium	2	0.666667	2
Bende	2	30	2	2	20	2	2	Trader	Self Employed	3	20	1	1	2	10	74	18.2615	P95	Obese	Abnormal	2	14	Normal	Normal	2	17.5	19	0.95	2	3	Medium	2	0.5	2
Bende	2	20	1	2	3	1	2	Hair Stylist	Self Employed	3	25	2	2	2	13	88	16.7872	P85	Overweight	Abnormal	2	14	Normal	Normal	2	19	17	0.85	2	3	Medium	2	0.5	2
Bende	2	21	1	1	NA	#NULL!	2	Trader	Self Employed	3	9	1	2	2	6.7	70	13.6735	P1	Underweight	Abnormal	2	12	MAM	GAM	1	17.2	16	0.8	2	3	Medium	2	0.5	2
Bende	2	31	2	2	2	1	2	Farmer	Self Employed	3	16	1	1	2	9	71	17.8536	P90	Overweight	Abnormal	2	14	Normal	Normal	2	18.5	17	0.85	2	5	High	3	0.833333	1
Bende	2	40	3	2	15	2	2	Farmer	Self Employed	3	48	2	2	2	15	101	14.7044	P50	Normal	Normal	1	14.5	Normal	Normal	2	18.5	17	0.85	2	4	Medium	2	0.666667	2
Bende	2	26	2	2	5	1	2	Teacher	Employed	2	51	2	1	2	14	93	16.1868	P75	Normal	Normal	1	16.1	Normal	Normal	2	19	18	0.9	2	4	Medium	2	0.666667	2
Bende	2	26	2	2	3	1	2	Unemployed	Unemployed	1	28	2	1	2	16	73	30.0244	P999	Obese	Abnormal	2	13	Normal	Normal	2	18	17	0.85	2	4	Medium	2	0.666667	2
Bende	2	26	2	1	NA	#NULL!	2	Unemployed	Unemployed	1	13	1	2	2	9	70	18.3673	P95	Obese	Abnormal	2	13.5	Normal	Normal	2	17	17	0.85	2	4	Medium	2	0.666667	2
Bende	2	35	2	2	9	1	1	Hair Stylist	Self Employed	3	24	1	1	2	8	69	16.8032	P75	Normal	Normal	1	11.5	MAM	GAM	1	18.5	14	0.7	2	5	High	3	0.833333	1
Bende	2	25	2	2	6	1	2	Hair Stylist	Self Employed	3	36	2	1	2	13	91	15.6986	P75	Normal	Normal	1	15	Normal	Normal	2	20	16	0.8	2	4	Medium	2	0.666667	2
Bende	2	22	1	2	4	1	2	Hair Stylist	Self Employed	3	24	1	2	2	10	82	14.8721	P50	Normal	Normal	1	14	Normal	Normal	2	24	12	0.6	1	5	High	3	0.833333	1
Bende	2	17	1	1	NA	#NULL!	2	Trader	Self Employed	3	24	1	2	1	9	77	15.1796	P50	Normal	Normal	1	13	Normal	Normal	2	23	12	0.6	1	3	Medium	2	0.5	2
Bende	2	32	2	2	14	2	2	Housewife	Unemployed	1	13	1	1	2	7	64	17.0898	P75	Normal	Normal	1	14	Normal	Normal	2	22.5	13	0.65	1	5	High	3	0.833333	1
Bende	2	19	1	1	NA	#NULL!	2	Farmer	Self Employed	3	15	1	2	1	8	74	14.6092	P25	Normal	Normal	1	13.5	Normal	Normal	2	20	11	0.55	1	5	High	3	0.833333	1
Bende	2	38	3	2	13	2	2	Farmer	Self Employed	3	13	1	2	1	7	68	15.1384	P25	Normal	Normal	1	12.5	MAM	GAM	1	21.5	10	0.5	1	3	Medium	2	0.5	2
Bende	2	48	3	2	23	2	2	Farmer	Self Employed	3	53	2	2	2	16	102	15.3787	P75	Normal	Normal	1	18	Normal	Normal	2	23.5	10	0.5	1	5	High	3	0.833333	1
Bende	2	45	3	1	NA	#NULL!	2	Farmer	Self Employed	3	54	2	2	1	15	101.5	14.5599	P50	Normal	Normal	1	16.5	Normal	Normal	2	26	11	0.55	1	3	Medium	2	0.5	2
Bende	2	44	3	2	6	1	2	Housewife	Unemployed	1	24	1	1	2	12	78	19.7239	P999	Obese	Abnormal	2	16	Normal	Normal	2	23.7	11	0.55	1	5	High	3	0.833333	1
Bende	2	20	1	1	NA	#NULL!	2	Trader	Self Employed	3	26	2	2	2	9	73	16.8887	P85	Overweight	Abnormal	2	14.5	Normal	Normal	2	23	12	0.6	1	4	Medium	2	0.666667	2
Bende	2	36	3	2	12	2	2	Farmer	Self Employed	3	14	1	1	2	9.5	72	18.3256	P90	Overweight	Abnormal	2	14.3	Normal	Normal	2	23	11	0.55	1	5	High	3	0.833333	1
Bende	2	22	1	2	2	1	2	Farmer	Self Employed	3	27	2	2	2	10	78	16.4366	P75	Normal	Normal	1	14.2	Normal	Normal	2	22	12	0.6	1	5	High	3	0.833333	1
Bende	2	40	3	2	14	2	2	Teacher	Employed	2	31	2	2	2	12	85.2	16.5311	P85	Overweight	Abnormal	2	15.6	Normal	Normal	2	23.7	9	0.45	1	5	High	3	0.833333	1
Bende	2	20	1	2	1	1	2	Hair Stylist	Self Employed	3	23	1	2	2	8	79	12.8185	P3	Underweight	Abnormal	2	13.3	Normal	Normal	2	22.5	12	0.6	1	3	Medium	2	0.5	2
Bende	2	34	2	2	6	1	2	Farmer	Self Employed	3	29	2	2	2	10	82	14.8721	P50	Normal	Normal	1	14.5	Normal	Normal	2	22.5	14	0.7	2	3	Medium	2	0.5	2
Bende	2	40	3	2	17	2	1	Trader	Self Employed	3	28	2	1	1	12	82	17.8465	P95	Obese	Abnormal	2	15.7	Normal	Normal	2	24	10	0.5	1	3	Medium	2	0.5	2
Bende	2	24	1	2	3	1	2	Trader	Self Employed	3	8	1	2	2	7	66	16.0698	P50	Normal	Normal	1	14.8	Normal	Normal	2	22.6	11	0.55	1	4	Medium	2	0.666667	2
Bende	2	49	3	2	20	2	1	Farmer	Self Employed	3	13	1	1	2	9	80	14.0625	P3	Underweight	Abnormal	2	14.3	Normal	Normal	2	25	11	0.55	1	6	High	3	1	1
Bende	2	25	2	2	1	1	1	Hair Stylist	Self Employed	3	48	2	1	2	10	98	10.4123	P01	Underweight	Abnormal	2	14.5	Normal	Normal	2	24	12	0.6	1	6	High	3	1	1
Bende	2	27	2	2	6	1	2	Trader	Self Employed	3	47	2	1	2	15	101	14.7044	P50	Normal	Normal	1	14.5	Normal	Normal	2	24	12	0.6	1	6	High	3	1	1
Bende	2	30	2	2	10	2	2	Trader	Self Employed	3	27	2	1	2	8	84	11.3379	P01	Underweight	Abnormal	2	14	Normal	Normal	2	24.5	9	0.45	1	6	High	3	1	1
Bende	2	21	1	2	7	1	2	Farmer	Self Employed	3	25	2	2	2	10	78	16.4366	P75	Normal	Normal	1	13.5	Normal	Normal	2	24.5	10	0.5	1	6	High	3	1	1
Bende	2	70	3	1	NA	#NULL!	1	Farmer	Self Employed	3	52	2	2	2	15	105	13.6054	P15	Normal	Normal	1	16	Normal	Normal	2	24.5	12	0.6	1	6	High	3	1	1
Bende	2	35	2	2	19	2	1	Farmer	Self Employed	3	7	1	1	2	7	70	14.2857	P1	Underweight	Abnormal	2	14	Normal	Normal	2	23	13	0.65	1	4	Medium	2	0.666667	2
Bende	2	32	2	2	8	1	2	Business	Self Employed	3	50	2	2	2	17	106	15.1299	P50	Normal	Normal	1	16	Normal	Normal	2	21	17	0.85	2	3	Medium	2	0.5	2
Bende	2	32	2	2	18	2	2	Business	Self Employed	3	34	2	2	2	11	88	14.2045	P25	Normal	Normal	1	15	Normal	Normal	2	21	17	0.85	2	3	Medium	2	0.5	2
Bende	2	36	3	2	7	1	3	Teacher	Employed	2	43	2	2	1	16	102	15.3787	P75	Normal	Normal	1	16.5	Normal	Normal	2	19	17	0.85	2	2	Low	1	0.333333	2
Bende	2	38	3	2	7	1	3	Trader	Self Employed	3	24	1	1	2	11	82	16.3593	P75	Normal	Normal	1	16	Normal	Normal	2	19	16	0.8	2	2	Low	1	0.333333	2
Bende	2	23	1	2	4	1	2	Trader	Self Employed	3	9	1	2	2	8.14	73	15.2749	P15	Normal	Normal	1	13.5	Normal	Normal	2	19	17	0.85	2	4	Medium	2	0.666667	2
Bende	2	26	2	2	5	1	2	Trader	Self Employed	3	18	1	1	1	9	78	14.7929	P15	Normal	Normal	1	15	Normal	Normal	2	18	17	0.85	2	3	Medium	2	0.5	2
Bende	2	26	2	2	3	1	2	Housewife	Unemployed	1	12	1	2	2	8	75	14.2222	P10	Normal	Normal	1	14	Normal	Normal	2	24	18	0.9	2	4	Medium	2	0.666667	2
Bende	2	42	3	1	NA	#NULL!	1	Farmer	Self Employed	3	41	2	1	2	16	86	21.6333	P999	Obese	Abnormal	2	16.5	Normal	Normal	2	24	13	0.65	1	6	High	3	1	1
Bende	2	28	2	2	8	1	2	Business	Self Employed	3	9	1	1	2	6.62	70	13.5102	P1	Underweight	Abnormal	2	11.5	MAM	GAM	1	45	19	0.95	2	4	Medium	2	0.666667	2
Bende	2	38	3	2	5	1	2	Business	Self Employed	3	36	2	1	2	15	103	14.1389	P15	Normal	Normal	1	15	Normal	Normal	2	5	16	0.8	2	3	Medium	2	0.5	2
Bende	2	36	3	2	4	1	2	Business	Self Employed	3	15	1	2	1	9.23	67	20.5614	P999	Obese	Abnormal	2	15	Normal	Normal	2	44	18	0.9	2	3	Medium	2	0.5	2
Bende	2	30	2	2	10	2	2	Hair Stylist	Self Employed	3	16	1	2	2	12	74	21.9138	P999	Obese	Abnormal	2	15	Normal	Normal	2	46	17	0.85	2	4	Medium	2	0.666667	2
Bende	2	52	3	2	23	2	1	Teacher	Employed	2	48	2	1	2	16	95	17.7285	P97	Obese	Abnormal	2	15.5	Normal	Normal	2	53	18	0.9	2	3	Medium	2	0.5	2
Bende	2	40	3	1	NA	#NULL!	2	Farmer	Self Employed	3	8	1	1	2	6.07	73	11.3905	P01	Underweight	Abnormal	2	12	MAM	GAM	1	43	17	0.85	2	3	Medium	2	0.5	2
Bende	2	29	2	2	8	1	2	Farmer	Self Employed	3	31	2	1	2	13	99	13.264	P3	Underweight	Abnormal	2	16	Normal	Normal	2	49	17	0.85	2	4	Medium	2	0.666667	2
Bende	2	39	3	2	10	2	2	Farmer	Self Employed	3	56	2	1	2	15	93	17.343	P95	Obese	Abnormal	2	13.5	Normal	Normal	2	49	17	0.85	2	3	Medium	2	0.5	2
Bende	2	34	2	2	5	1	1	Teacher	Employed	2	32	2	2	2	14	83	20.3223	P999	Obese	Abnormal	2	15.5	Normal	Normal	2	48	16	0.8	2	3	Medium	2	0.5	2
Bende	2	20	1	2	3	1	2	Business	Self Employed	3	25	2	2	1	10	79	16.0231	P75	Normal	Normal	1	12.5	MAM	GAM	1	48	17	0.85	2	3	Medium	2	0.5	2
Bende	2	36	3	2	8	1	2	Teacher	Employed	2	13	1	2	2	13	78	21.3675	P999	Obese	Abnormal	2	16	Normal	Normal	2	46	17	0.85	2	3	Medium	2	0.5	2
Bende	2	25	2	2	4	1	2	Teacher	Employed	2	55	2	2	2	11	95	12.1884	P1	Underweight	Abnormal	2	14	Normal	Normal	2	49	16	0.8	2	6	High	3	1	1
Bende	2	37	3	2	15	2	2	Trader	Self Employed	3	14	1	2	2	9	69	18.9036	P97	Obese	Abnormal	2	14	Normal	Normal	2	23	13	0.65	1	6	High	3	1	1
Bende	2	23	1	2	6	1	2	Farmer	Self Employed	3	42	2	2	2	16	98	16.6597	P85	Overweight	Abnormal	2	16	Normal	Normal	2	24.5	10	0.5	1	6	High	3	1	1
Bende	2	21	1	2	8	1	2	Farmer	Self Employed	3	19	1	1	2	10	77	16.8663	P75	Normal	Normal	1	14	Normal	Normal	2	23.5	10	0.5	1	6	High	3	1	1
Bende	2	30	2	1	NA	#NULL!	1	Farmer	Self Employed	3	19	1	1	2	10	79	16.0231	P50	Normal	Normal	1	12	MAM	GAM	1	23.5	10	0.5	1	6	High	3	1	1
Bende	2	22	1	1	NA	#NULL!	2	Hair Stylist	Self Employed	3	14	1	1	2	8	75	14.2222	P3	Underweight	Abnormal	2	12.8	Normal	Normal	2	23	9	0.45	1	6	High	3	1	1
Bende	2	28	2	2	8	1	1	Business	Self Employed	3	31	2	2	1	11	91	13.2834	P3	Underweight	Abnormal	2	15	Normal	Normal	2	25	10	0.5	1	1	Low	1	0.166667	2
Bende	2	22	1	2	3	1	1	Business	Self Employed	3	7	1	2	2	3.5	32	34.1797	P999	Obese	Abnormal	2	13.5	Normal	Normal	2	21.5	14	0.7	2	1	Low	1	0.166667	2
Bende	2	31	2	2	9	1	3	Caterer	Self Employed	3	56	2	1	2	20	114	15.3894	P75	Normal	Normal	1	19	Normal	Normal	2	25.2	15	0.75	2	1	Low	1	0.166667	2
Bende	2	23	1	2	18	2	3	Business	Self Employed	3	6	1	1	2	6.5	70	13.2653	P01	Underweight	Abnormal	2	13	Normal	Normal	2	21.5	17	0.85	2	1	Low	1	0.166667	2
Bende	2	36	3	2	10	2	1	Farmer	Self Employed	3	31	2	1	2	9	82	13.3849	P3	Underweight	Abnormal	2	14.3	Normal	Normal	2	23.5	14	0.7	2	2	Low	1	0.333333	2
Bende	2	32	2	2	15	2	1	Business	Self Employed	3	50	2	2	2	14	93	16.1868	P75	Normal	Normal	1	16	Normal	Normal	2	23.5	14	0.7	2	1	Low	1	0.166667	2
Bende	2	30	2	2	13	2	1	Fashion Designer	Self Employed	3	48	2	2	2	18	101	17.6453	P95	Obese	Abnormal	2	16.3	Normal	Normal	2	25	13	0.65	1	2	Low	1	0.333333	2
Bende	2	35	2	2	4	1	1	Business	Self Employed	3	50	2	1	2	18	102	17.301	P95	Obese	Abnormal	2	17	Normal	Normal	2	25	13	0.65	1	2	Low	1	0.333333	2
Bende	2	42	3	2	12	2	1	Fast food	Self Employed	3	48	2	2	2	18	97	19.1306	P99	Obese	Abnormal	2	15.2	Normal	Normal	2	23.5	13	0.65	1	1	Low	1	0.166667	2
Bende	2	25	2	2	3	1	2	Fast food	Self Employed	3	36	2	1	2	17	95	18.8366	P99	Obese	Abnormal	2	16	Normal	Normal	2	24.5	14	0.7	2	1	Low	1	0.166667	2
Bende	2	24	1	2	7	1	2	Farmer	Self Employed	3	58	2	2	2	19	113	14.8798	P50	Normal	Normal	1	16	Normal	Normal	2	25.5	15	0.75	2	2	Low	1	0.333333	2
Bende	2	38	3	2	6	1	2	Fashion Designer	Self Employed	3	36	2	2	2	13	98	13.536	P10	Normal	Normal	1	15.5	Normal	Normal	2	23	19	0.95	2	4	Medium	2	0.666667	2
Bende	2	22	1	2	3	1	2	Civil servant	Employed	2	26	2	2	2	12	105	10.8844	P01	Underweight	Abnormal	2	15	Normal	Normal	2	25	18	0.9	2	2	Low	1	0.333333	2
Bende	2	31	2	1	4	1	2	Farmer	Self Employed	3	17	1	2	2	8	69	16.8032	P85	Overweight	Abnormal	2	13	Normal	Normal	2	17	16	0.8	2	3	Medium	2	0.5	2
Bende	2	35	2	2	5	1	2	Trader	Self Employed	3	29	2	2	2	9	75	16	P75	Normal	Normal	1	14	Normal	Normal	2	17	17	0.85	2	3	Medium	2	0.5	2
Bende	2	43	3	2	7	1	2	Teacher	Employed	2	31	2	1	2	11	89	13.8871	P5	Normal	Normal	1	14	Normal	Normal	2	24.5	18	0.9	2	3	Medium	2	0.5	2
Bende	2	47	3	2	18	2	3	Fashion Designer	Self Employed	3	56	2	2	2	20	112	15.9439	P75	Normal	Normal	1	16.5	Normal	Normal	2	25	18	0.9	2	3	Medium	2	0.5	2
Bende	2	37	3	2	12	2	2	Farmer	Self Employed	3	17	1	2	2	7	69	14.7028	P25	Normal	Normal	1	13.5	Normal	Normal	2	22	19	0.95	2	4	Medium	2	0.666667	2
Bende	2	31	2	2	4	1	2	Fashion Designer	Self Employed	3	36	2	2	2	12	95	13.2964	P5	Normal	Normal	1	13.5	Normal	Normal	2	25	15	0.75	2	4	Medium	2	0.666667	2
Bende	2	35	2	2	10	2	2	Business	Self Employed	3	24	1	2	2	11	87	14.533	P25	Normal	Normal	1	14.3	Normal	Normal	2	32	13	0.65	1	1	Low	1	0.166667	2
Bende	2	29	2	2	6	1	2	Pastor	Employed	2	38	2	2	2	15	98	15.6185	P75	Normal	Normal	1	14.8	Normal	Normal	2	25	16	0.8	2	3	Medium	2	0.5	2
Bende	2	46	3	2	16	2	2	Farmer	Self Employed	3	30	2	1	2	15	94	16.976	P85	Overweight	Abnormal	2	15.8	Normal	Normal	2	24.5	12	0.6	1	3	Medium	2	0.5	2
Bende	2	40	3	2	8	1	2	Trader	Self Employed	3	36	2	1	2	10	93	11.562	P01	Underweight	Abnormal	2	16	Normal	Normal	2	19	18	0.9	2	3	Medium	2	0.5	2
Bende	2	29	2	1	NA	#NULL!	2	Trader	Self Employed	3	36	2	2	1	10	86	13.5208	P10	Normal	Normal	1	14	Normal	Normal	2	23	11	0.55	1	6	High	3	1	1
Bende	2	36	3	2	7	1	2	Trader	Self Employed	3	40	2	2	1	13	90	16.0494	P75	Normal	Normal	1	16	Normal	Normal	2	24.5	13	0.65	1	6	High	3	1	1
Bende	2	40	3	1	NA	#NULL!	3	Trader	Self Employed	3	50	2	2	2	15	114	11.542	P01	Underweight	Abnormal	2	16.1	Normal	Normal	2	25.1	11	0.55	1	6	High	3	1	1
Bende	2	27	2	2	5	1	2	Farmer	Self Employed	3	16	1	2	2	9	72.3	17.2173	P85	Overweight	Abnormal	2	14	Normal	Normal	2	22.5	19	0.95	2	4	Medium	2	0.666667	2
Bende	2	44	3	2	8	1	2	Business	Self Employed	3	50	2	1	2	15	101	14.7044	P50	Normal	Normal	1	15.4	Normal	Normal	2	24.5	14	0.7	2	6	High	3	1	1
Bende	2	37	3	2	4	1	2	Business	Self Employed	3	26	2	1	2	12	84	17.0068	P85	Overweight	Abnormal	2	14	Normal	Normal	2	47	18	0.9	2	4	Medium	2	0.666667	2
Bende	2	31	2	2	12	2	2	Business	Self Employed	3	57	2	1	2	18	101	17.6453	P97	Obese	Abnormal	2	14.5	Normal	Normal	2	50	18	0.9	2	2	Low	1	0.333333	2
Bende	2	38	3	2	6	1	2	Business	Self Employed	3	20	1	2	2	8	71	15.8699	P75	Normal	Normal	1	14	Normal	Normal	2	48	18	0.9	2	3	Medium	2	0.5	2
Bende	2	65	3	2	35	2	1	Farmer	Self Employed	3	56	2	1	2	12	100	12	P1	Underweight	Abnormal	2	16	Normal	Normal	2	50	13	0.65	1	1	Low	1	0.166667	2
Bende	2	32	2	2	12	2	1	Business	Self Employed	3	18	1	1	2	11	79	17.6254	P90	Overweight	Abnormal	2	15.5	Normal	Normal	2	23.5	14	0.7	2	6	High	3	1	1
Bende	2	31	2	2	18	2	2	Trader	Self Employed	3	43	2	1	2	13	90	16.0494	P75	Normal	Normal	1	15	Normal	Normal	2	24	13	0.65	1	4	Medium	2	0.666667	2
Bende	2	35	2	2	10	2	2	Trader	Self Employed	3	37	2	2	2	14	95	15.5125	P75	Normal	Normal	1	15.4	Normal	Normal	2	23.8	12	0.6	1	3	Medium	2	0.5	2
Bende	2	31	2	2	8	1	2	Farmer	Self Employed	3	48	2	2	2	13.5	93	15.6087	P75	Normal	Normal	1	16.2	Normal	Normal	2	24	12	0.6	1	3	Medium	2	0.5	2
Bende	2	32	2	2	14	2	2	Trader	Self Employed	3	46	2	2	2	13.5	92	15.9499	P75	Normal	Normal	1	15.7	Normal	Normal	2	23.5	12	0.6	1	3	Medium	2	0.5	2
Bende	2	33	2	1	NA	#NULL!	2	Trader	Self Employed	3	56	2	2	1	17	103	16.0241	P75	Normal	Normal	1	16.5	Normal	Normal	2	25	10	0.5	1	3	Medium	2	0.5	2
Bende	2	29	2	1	NA	#NULL!	2	Student	Unemployed	1	22	1	2	2	11	77	18.5529	P99	Obese	Abnormal	2	16	Normal	Normal	2	23.5	10	0.5	1	3	Medium	2	0.5	2
Bende	2	28	2	2	8	1	2	Farmer	Self Employed	3	15	1	2	2	12	84.5	16.8061	P75	Normal	Normal	1	15.5	Normal	Normal	2	22	11	0.55	1	3	Medium	2	0.5	2
Bende	2	20	1	2	2	1	2	Retired	Unemployed	1	14	1	1	2	11	87	14.533	P5	Normal	Normal	1	15	Normal	Normal	2	24	19	0.95	2	4	Medium	2	0.666667	2
Bende	2	38	3	2	20	2	2	Business	Self Employed	3	27	2	1	2	10	82	14.8721	P25	Normal	Normal	1	12.5	MAM	GAM	1	25.5	11	0.55	1	3	Medium	2	0.5	2
Bende	2	25	2	2	13	2	2	Hair Stylist	Self Employed	3	36	2	1	2	15	75	26.6667	P999	Obese	Abnormal	2	15.3	Normal	Normal	2	27	11	0.55	1	4	Medium	2	0.666667	2
Bende	2	40	3	2	21	2	2	Trader	Self Employed	3	34	2	1	2	13	75	23.1111	P999	Obese	Abnormal	2	13.7	Normal	Normal	2	26.5	11	0.55	1	2	Low	1	0.333333	2
Bende	2	25	2	1	3	1	2	Hair Stylist	Self Employed	3	26	2	1	2	12	95	13.2964	P1	Underweight	Abnormal	2	14.4	Normal	Normal	2	25	12	0.6	1	5	High	3	0.833333	1
Bende	2	42	3	2	20	2	2	Farmer	Self Employed	3	18	1	2	2	13	73	24.3948	P999	Obese	Abnormal	2	14.3	Normal	Normal	2	24	13	0.65	1	4	Medium	2	0.666667	2
Bende	2	32	2	1	NA	#NULL!	2	Farmer	Self Employed	3	52	2	2	2	13	103	12.2537	P1	Underweight	Abnormal	2	15	Normal	Normal	2	24	11	0.55	1	3	Medium	2	0.5	2
Bende	2	39	3	1	14	2	2	Trader	Self Employed	3	58	2	1	2	15	105	13.6054	P10	Normal	Normal	1	14.5	Normal	Normal	2	24	11	0.55	1	3	Medium	2	0.5	2
Bende	2	49	3	1	20	2	2	Farmer	Self Employed	3	58	2	2	2	15	115	11.3422	P01	Underweight	Abnormal	2	14.3	Normal	Normal	2	26	11	0.55	1	5	High	3	0.833333	1
Bende	2	22	1	2	2	1	2	Farmer	Self Employed	3	16	1	1	2	9	74	16.4354	P75	Normal	Normal	1	13.1	Normal	Normal	2	24	12	0.6	1	4	Medium	2	0.666667	2
Bende	2	26	2	2	4	1	2	Housewife	Unemployed	1	12	1	2	2	9	70	18.3673	P90	Overweight	Abnormal	2	12.9	Normal	Normal	2	22	12	0.6	1	4	Medium	2	0.666667	2
Bende	2	24	1	2	4	1	2	Farmer	Self Employed	3	37	2	1	2	14	96	15.191	P50	Normal	Normal	1	14.4	Normal	Normal	2	26	12	0.6	1	4	Medium	2	0.666667	2
Bende	2	29	2	1	6	1	2	Trader	Self Employed	3	58	2	1	2	15	80	23.4375	P999	Obese	Abnormal	2	15.1	Normal	Normal	2	27	11	0.55	1	4	Medium	2	0.666667	2
Bende	2	60	3	2	40	2	1	Farmer	Self Employed	3	56	2	2	2	19	110	15.7025	P75	Normal	Normal	1	17.5	Normal	Normal	2	27	16	0.8	2	5	High	3	0.833333	1
Bende	2	34	2	2	15	2	3	Farmer	Self Employed	3	56	2	2	2	15	109	12.6252	P3	Underweight	Abnormal	2	15	Normal	Normal	2	24.5	19	0.95	2	3	Medium	2	0.5	2
Bende	2	27	2	2	4	1	2	Fashion Designer	Self Employed	3	24	1	1	2	11	83	15.9675	P50	Normal	Normal	1	14.5	Normal	Normal	2	19	19	0.95	2	3	Medium	2	0.5	2
Bende	2	39	3	2	7	1	2	Teacher	Employed	2	31	2	2	2	15	96	16.276	P75	Normal	Normal	1	15.5	Normal	Normal	2	20	19	0.95	2	2	Low	1	0.333333	2
Bende	2	30	2	2	5	1	2	Farmer	Self Employed	3	24	1	2	2	8	75	14.2222	P15	Normal	Normal	1	14.5	Normal	Normal	2	18	12	0.6	1	2	Low	1	0.333333	2
Bende	2	28	2	2	7	1	1	Farmer	Self Employed	3	11	1	2	2	8.6	70	17.551	P85	Overweight	Abnormal	2	13.4	Normal	Normal	2	17	12	0.6	1	3	Medium	2	0.5	2
Bende	2	32	2	2	10	2	2	Hair Stylist	Self Employed	3	48	2	2	2	17	99	17.3452	P95	Obese	Abnormal	2	14	Normal	Normal	2	19	12	0.6	1	2	Low	1	0.333333	2
Bende	2	30	2	2	7	1	3	Unemployed	Unemployed	1	50	2	2	2	16	100	16	P75	Normal	Normal	1	15	Normal	Normal	2	19	13	0.65	1	2	Low	1	0.333333	2
Bende	2	35	2	2	13	2	2	Farmer	Self Employed	3	51	2	2	2	18	99	18.3655	P97	Obese	Abnormal	2	16	Normal	Normal	2	19	13	0.65	1	3	Medium	2	0.5	2
Bende	2	35	2	2	10	2	2	Trader	Self Employed	3	38	2	1	2	15	92	17.7221	P95	Obese	Abnormal	2	12	MAM	GAM	1	19	13	0.65	1	3	Medium	2	0.5	2
Bende	2	40	3	2	16	2	2	Fashion Designer	Self Employed	3	36	2	2	2	15	86	20.2812	P999	Obese	Abnormal	2	15	Normal	Normal	2	18	11	0.55	1	3	Medium	2	0.5	2
Bende	2	35	2	2	10	2	2	Trader	Self Employed	3	25	2	1	2	19	95	21.0526	P999	Obese	Abnormal	2	14	Normal	Normal	2	19	12	0.6	1	2	Low	1	0.333333	2
Bende	2	40	3	2	10	2	2	Trader	Self Employed	3	36	2	1	2	20	95	22.1607	P999	Obese	Abnormal	2	15	Normal	Normal	2	19.5	10	0.5	1	2	Low	1	0.333333	2
Bende	2	37	3	1	10	2	2	Farmer	Self Employed	3	18	1	2	2	16	79	25.6369	P999	Obese	Abnormal	2	15	Normal	Normal	2	18.5	14	0.7	2	3	Medium	2	0.5	2
Bende	2	35	2	2	15	2	2	Farmer	Self Employed	3	36	2	1	2	15	80	23.4375	P999	Obese	Abnormal	2	15	Normal	Normal	2	19	16	0.8	2	2	Low	1	0.333333	2
Bende	2	30	2	2	6	1	2	Trader	Self Employed	3	26	2	2	2	13.5	78	22.1893	P999	Obese	Abnormal	2	14	Normal	Normal	2	18	14	0.7	2	2	Low	1	0.333333	2
Bende	2	30	2	2	3	1	2	Teacher	Employed	2	25	2	1	2	12	83	17.4191	P90	Overweight	Abnormal	2	13	Normal	Normal	2	18	13	0.65	1	2	Low	1	0.333333	2
Bende	2	28	2	2	10	2	1	Farmer	Self Employed	3	2	1	2	2	14	80	21.875	P999	Obese	Abnormal	2	13	Normal	Normal	2	19	12	0.6	1	#NULL!		#NULL!	0	#NULL!
Bende	2	23	1	2	4	1	2	Trader	Self Employed	3	42	2	2	2	15	103	14.1389	P25	Normal	Normal	1	15.6	Normal	Normal	2	51	11	0.55	1	#NULL!		#NULL!	0	#NULL!
Bende	2	31	2	2	9	1	3	Worker	Employed	2	36	2	1	2	13	91	15.6986	P75	Normal	Normal	1	14	Normal	Normal	2	49	11	0.55	1	#NULL!		#NULL!	0	#NULL!
Bende	2	32	2	2	5	1	1	Farmer	Self Employed	3	36	2	1	2	14	90	17.284	P90	Overweight	Abnormal	2	15.3	Normal	Normal	2	49.8	11	0.55	1	#NULL!		#NULL!	0	#NULL!
Bende	2	26	2	2	6	1	1	Farmer	Self Employed	3	2	1	2	2	14	87	18.4965	P97	Obese	Abnormal	2	15	Normal	Normal	2	19	10	0.5	1	#NULL!		#NULL!	0	#NULL!
Bende	2	25	2	2	5	1	1	Trader	Self Employed	3	5	1	2	2	20	90	24.6914	P999	Obese	Abnormal	2	15	Normal	Normal	2	19	13	0.65	1	#NULL!		#NULL!	0	#NULL!
Bende	2	40	3	2	15	2	2	Artisans	Self Employed	3	2	1	1	2	14	88	18.0785	P90	Overweight	Abnormal	2	13	Normal	Normal	2	19	13	0.65	1	#NULL!		#NULL!	0	#NULL!
Bende	2	19	1	1		#NULL!	2	Unemployed	Unemployed	1	15	1	1	2	0.5	26.5	7.11997	P01	Underweight	Abnormal	2	14	Normal	Normal	2	18	19	0.95	2	#NULL!		#NULL!	0	#NULL!
Bende	2	30	2	2	21	2	2	Farmer	Self Employed	3	45	2	1	2	16	64	39.0625	P999	Obese	Abnormal	2	15.2	Normal	Normal	2	19.4	15	0.75	2	#NULL!		#NULL!	0	#NULL!
Bende	2	29	2	2	8	1	2	Farmer	Self Employed	3	48	2	2	1	14	86	18.9292	P99	Obese	Abnormal	2	14.2	Normal	Normal	2	52	12	0.6	1	#NULL!		#NULL!	0	#NULL!
Bende	2	40	3	2	14	2	1	Farmer	Self Employed	3	28	2	1	2	13	82	19.3337	P999	Obese	Abnormal	2	14.7	Normal	Normal	2	46	14	0.7	2	#NULL!		#NULL!	0	#NULL!
Bende	2	30	2	2	5	1	1	Farmer	Self Employed	3	47	2	1	2	14	98	14.5773	P50	Normal	Normal	1	14.7	Normal	Normal	2	50	15	0.75	2	#NULL!		#NULL!	0	#NULL!
Bende	2	30	2	2	5	1	1	Farmer	Self Employed	3	26	2	1	2	11	74	20.0877	P999	Obese	Abnormal	2	12	MAM	GAM	1	47	14	0.7	2	#NULL!		#NULL!	0	#NULL!
Bende	2	40	3	1	2	1	1	Business	Self Employed	3	18	1	2	2	10	74	18.2615	P97	Obese	Abnormal	2	12	MAM	GAM	1	47	12	0.6	1	#NULL!		#NULL!	0	#NULL!
Bende	2	26	2	1		#NULL!	1	Business	Self Employed	3	36	2	2	2	14	100	14	P15	Normal	Normal	1	15	Normal	Normal	2	48	14	0.7	2	#NULL!		#NULL!	0	#NULL!
Bende	2	25	2	2	4	1	2	Artisans	Self Employed	3	38	2	1	2	13	87	17.1753	P90	Overweight	Abnormal	2	15	Normal	Normal	2	49	13	0.65	1	#NULL!		#NULL!	0	#NULL!
Bende	2	35	2	1		#NULL!	2	Trader	Self Employed	3	29	2	2	2	7	76	12.1191	P01	Underweight	Abnormal	2	12.5	MAM	GAM	1	46	15	0.75	2	#NULL!		#NULL!	0	#NULL!
Bende	2	38	3	2	14	2	2	Business	Self Employed	3	84	2	1	2	16	115	12.0983	P999	Obese	Abnormal	2	19.5	Normal	Normal	2	50	13	0.65	1	#NULL!		#NULL!	0	#NULL!
Bende	2	36	3	2	8	1	2	Business	Self Employed	3	26	2	2	2	10	82	14.8721	P50	Normal	Normal	1	17	Normal	Normal	2	49	12	0.6	1	#NULL!		#NULL!	0	#NULL!
Bende	2	50	3	2	19	2	2	Business	Self Employed	3	59	2	1	2	17	104	15.7175	P75	Normal	Normal	1	19	Normal	Normal	2	51	12	0.6	1	#NULL!		#NULL!	0	#NULL!
Bende	2	28	2	2	3	1	2	Trader	Self Employed	3	24	1	1	2	12	86	16.225	P75	Normal	Normal	1	18	Normal	Normal	2	48	11	0.55	1	#NULL!		#NULL!	0	#NULL!
Bende	2	31	2	2	9	1	2	Trader	Self Employed	3	40	2	1	2	15.5	105	14.059	P15	Normal	Normal	1	15.2	Normal	Normal	2	50.5	14	0.7	2	#NULL!		#NULL!	0	#NULL!
Bende	2	27	2	2	10	2	1	Business	Self Employed	3	24	1	1	2	13	91	15.6986	P50	Normal	Normal	1	15.3	Normal	Normal	2	49	14	0.7	2	#NULL!		#NULL!	0	#NULL!
Bende	2	38	3	2	15	2	2	Business	Self Employed	3	84	2	2	2	20	123	13.2196	P999	Obese	Abnormal	2	19	Normal	Normal	2	51	12	0.6	1	#NULL!		#NULL!	0	#NULL!
Bende	2	38	3	2	15	2	2	Business	Self Employed	3	59	2	2	2	18	109	15.1502	P50	Normal	Normal	1	19.5	Normal	Normal	2	55	8	0.4	1	#NULL!		#NULL!	0	#NULL!
Bende	2	54	3	1		#NULL!	3	Farmer	Self Employed	3	42	2	1	2	15	90	18.5185	P99	Obese	Abnormal	2	17	Normal	Normal	2	53	12	0.6	1	#NULL!		#NULL!	0	#NULL!
Bende	2	63	3	2	16	2	2	Farmer	Self Employed	3	72	2	1	1	19	120	13.1944	P999	Obese	Abnormal	2	15.4	Normal	Normal	2	47.9	14	0.7	2	#NULL!		#NULL!	0	#NULL!
Bende	2	29	2	2	9	1	2	Business	Self Employed	3	3	1	2	1	16	120	11.1111	P01	Underweight	Abnormal	2	15.4	Normal	Normal	2	49.5	14	0.7	2	#NULL!		#NULL!	0	#NULL!
Bende	2	39	3	2	16	2	1	Farmer	Self Employed	3	48	2	2	2	13	92	15.3592	P75	Normal	Normal	1	15.4	Normal	Normal	2	49	12	0.6	1	#NULL!		#NULL!	0	#NULL!
Bende	2	44	3	2	13	2	3	Farmer	Self Employed	3	25	2	2	2	14	86	18.9292	P99	Obese	Abnormal	2	15	Normal	Normal	2	47.3	11	0.55	1	#NULL!		#NULL!	0	#NULL!
Bende	2	34	2	2	13	2	1	Artisans	Self Employed	3	60	2	2	2	16	101	15.6847	P75	Normal	Normal	1	15.7	Normal	Normal	2	48.7	12	0.6	1	#NULL!		#NULL!	0	#NULL!
Bende	2	37	3	2	13	2	1	Business	Self Employed	3	60	2	2	2	18	107	15.7219	P75	Normal	Normal	1	16.5	Normal	Normal	2	49	12	0.6	1	#NULL!		#NULL!	0	#NULL!
Bende	2	27	2	2	6	1	2	Business	Self Employed	3	36	2	2	2	11	88	14.2045	P25	Normal	Normal	1	15.5	Normal	Normal	2	50	14	0.7	2	#NULL!		#NULL!	0	#NULL!
Bende	2	30	2	2	12	2	2	Farmer	Self Employed	3	40	2	2	1	16	100	16	P75	Normal	Normal	1	16	Normal	Normal	2	49	13	0.65	1	#NULL!		#NULL!	0	#NULL!
Bende	2	42	3	1		#NULL!	1	Business	Self Employed	3	39	2	2	1	12	80	18.75	P99	Obese	Abnormal	2	14.5	Normal	Normal	2	50	6	0.3	1	#NULL!		#NULL!	0	#NULL!
Bende	2	37	3	2	14	2	2	Business	Self Employed	3	60	2	2	2	19	107	16.5953	P85	Overweight	Abnormal	2	15.5	Normal	Normal	2	50	13	0.65	1	#NULL!		#NULL!	0	#NULL!
Bende	2	43	3	2	12	2	1	Farmer	Self Employed	3	48	2	1	1	17	110	14.0496	P15	Normal	Normal	1	15.2	Normal	Normal	2	51.2	14	0.7	2	#NULL!		#NULL!	0	#NULL!
Bende	2	78	3	2	45	2	1	Farmer	Self Employed	3	36	2	2	2	16	90	19.7531	P999	Obese	Abnormal	2	16.8	Normal	Normal	2	48.5	9	0.45	1	#NULL!		#NULL!	0	#NULL!
Bende	2	25	2	2	5	1	2	Farmer	Self Employed	3	58	2	2	2	10	90	12.3457	P3	Underweight	Abnormal	2	15.5	Normal	Normal	2	49	10	0.5	1	#NULL!		#NULL!	0	#NULL!
Bende	2	25	2	2	5	1	2	Trader	Self Employed	3	36	2	2	2	11	90	13.5802	P10	Normal	Normal	1	14.7	Normal	Normal	2	47.5	13	0.65	1	#NULL!		#NULL!	0	#NULL!
Bende	2	40	3	2	6	1	2	Farmer	Self Employed	3	60	2	1	1	12.5	108	10.7167	P01	Underweight	Abnormal	2	15	Normal	Normal	2	50	10	0.5	1	#NULL!		#NULL!	0	#NULL!
Bende	2	25	2	2	6	1	2	Trader	Self Employed	3	18	1	1	2	15	79	24.0346	P999	Obese	Abnormal	2	13	Normal	Normal	2	20	13	0.65	1	#NULL!		#NULL!	0	#NULL!
Bende	2	30	2	2	8	1	1	Farmer	Self Employed	3	48	2	2	2	0.9	29.5	10.3419	P01	Underweight	Abnormal	2	11	SAM	GAM	1	17.5	14	0.7	2	#NULL!		#NULL!	0	#NULL!
Bende	2	35	2	2	3	1	3	Chemist	Self Employed	3	48	2	2	2	1.9	30.5	20.4246	P999	Obese	Abnormal	2	12	MAM	GAM	1	20	17	0.85	2	#NULL!		#NULL!	0	#NULL!
Bende	2	21	1	2	4	1	2	Farmer	Self Employed	3	18	1	2	2	9	72	17.3611	P90	Overweight	Abnormal	2	13.8	Normal	Normal	2	46	11	0.55	1	#NULL!		#NULL!	0	#NULL!
Bende	2	27	2	2	7	1	2	Business	Self Employed	3	44	2	2	2	13	92	15.3592	P75	Normal	Normal	1	15.2	Normal	Normal	2	48	10	0.5	1	#NULL!		#NULL!	0	#NULL!
Bende	2	40	3	2	18	2	1	Farmer	Self Employed	3	60	2	2	2	14	99	14.2843	P25	Normal	Normal	1	14.5	Normal	Normal	2	49	10	0.5	1	#NULL!		#NULL!	0	#NULL!
Bende	2	30	2	2	8	1	1	Farmer	Self Employed	3	1	1	2	2	10	69	21.004	P999	Obese	Abnormal	2	13	Normal	Normal	2	19	13	0.65	1	#NULL!		#NULL!	0	#NULL!
Bende	2	28	2	2	8	1	2	Trader	Self Employed	3	21	1	1	2	10	73.9	18.311	P97	Obese	Abnormal	2	15	Normal	Normal	2	22.2	9	0.45	1	#NULL!		#NULL!	0	#NULL!
Umuahia South	1	50	3	2	22	2	3	Farmer	Self Employed	3	8	1	2	2	6.65	64	16.2354	P50	Normal	Normal	1	12.4	MAM	GAM	1	44	17	0.85	2	5	High	3	0.833333	1
Umuahia South	1	16	1	2	2	1	3	Teacher	Employed	2	16	1	1	2	8	72	15.4321	P25	Normal	Normal	1	13.8	Normal	Normal	2	46	17	0.85	2	5	High	3	0.833333	1
Umuahia South	1	22	1	2	1	1	2	Unemployed	Unemployed	1	8	1	1	2	8.3	68	17.9498	P75	Normal	Normal	1	15	Normal	Normal	2	45	13	0.65	1	5	High	3	0.833333	1
Umuahia South	1	50	3	2	20	2	2	Trader	Self Employed	3	28	2	2	1	14	79	22.4323	P999	Obese	Abnormal	2	16.5	Normal	Normal	2	49	16	0.8	2	5	High	3	0.833333	1
Umuahia South	1	26	2	2	6	1	2	Trader	Self Employed	3	27	2	1	2	12	63	30.2343	P999	Obese	Abnormal	2	14.5	Normal	Normal	2	40	14	0.7	2	5	High	3	0.833333	1
Umuahia South	1	36	3	2	8	1	2	Trader	Self Employed	3	12	1	2	1	13	88	16.7872	P75	Normal	Normal	1	12	MAM	GAM	1	47	13	0.65	1	3	Medium	2	0.5	2
Umuahia South	1	27	2	2	4	1	2	Farmer	Self Employed	3	9	1	2	1	8	66	18.3655	P85	Overweight	Abnormal	2	14.5	Normal	Normal	2	49	16	0.8	2	#NULL!		#NULL!	0	#NULL!
Umuahia South	1	30	2	2	10	2	2	Trader	Self Employed	3	24	1	2	1	10	88	12.9132	P1	Underweight	Abnormal	2	12.6	Normal	Normal	2	46	13	0.65	1	2	Low	1	0.333333	2
Umuahia South	1	31	2	2	9	1	3	Trader	Self Employed	3	7	1	2	2	6	60	16.6667	P50	Normal	Normal	1	14	Normal	Normal	2	43	12	0.6	1	3	Medium	2	0.5	2
Umuahia South	1	40	3	2	14	2	2	Trader	Self Employed	3	48	2	1	1	13	86	17.5771	P95	Obese	Abnormal	2	15.1	Normal	Normal	2	51	13	0.65	1	4	Medium	2	0.666667	2
Umuahia South	1	28	2	2	5	1	2	Teacher	Employed	2	12	1	1	1	7	67	15.5937	P25	Normal	Normal	1	12	MAM	GAM	1	34	12	0.6	1	1	Low	1	0.166667	2
Umuahia South	1	25	2	2	4	1	3	Farmer	Self Employed	3	36	2	1	1	13	86	17.5771	P95	Obese	Abnormal	2	14	Normal	Normal	2	46	13	0.65	1	4	Medium	2	0.666667	2
Umuahia South	1	33	2	2	3	1	2	Teacher	Employed	2	24	1	2	2	13	88	16.7872	P85	Overweight	Abnormal	2	18	Normal	Normal	2	45	18	0.9	2	2	Low	1	0.333333	2
Umuahia South	1	31	2	2	8	1	3	Fashion Designer	Self Employed	3	18	1	2	2	10	78	16.4366	P75	Normal	Normal	1	14	Normal	Normal	2	44	16	0.8	2	2	Low	1	0.333333	2
Umuahia South	1	35	2	2	6	1	2	Farmer	Self Employed	3	24	1	2	1	11	82	16.3593	P75	Normal	Normal	1	13	Normal	Normal	2	46	19	0.95	2	4	Medium	2	0.666667	2
Umuahia South	1	34	2	2	7	1	2	STUDENT	Unemployed	1	6	1	2	2	7.59	65	17.9645	P75	Normal	Normal	1	14	Normal	Normal	2	39	16	0.8	2	4	Medium	2	0.666667	2
Umuahia South	1	15	1	1	NA	#NULL!	2	STUDENT	Unemployed	1	19	1	1	2	9	78	14.7929	P15	Normal	Normal	1	13	Normal	Normal	2	46	16	0.8	2	5	High	3	0.833333	1
Umuahia South	1	26	2	2	6	1	2	STUDENT	Unemployed	1	58	2	2	2	16	109	13.4669	P10	Normal	Normal	1	15	Normal	Normal	2	48	17	0.85	2	3	Medium	2	0.5	2
Umuahia South	1	62	3	2	38	2	1	Trader	Self Employed	3	12	1	2	2	6.73	63	16.9564	P75	Normal	Normal	1	12	MAM	GAM	1	43	16	0.8	2	3	Medium	2	0.5	2
Umuahia South	1	34	2	2	18	2	2	Farmer	Self Employed	3	24	1	2	2	8	76	13.8504	P10	Normal	Normal	1	12	MAM	GAM	1	46	15	0.75	2	4	Medium	2	0.666667	2
Umuahia South	1	27	2	2	2	1	2	Trader	Self Employed	3	19	1	2	2	11	83	15.9675	P75	Normal	Normal	1	15.4	Normal	Normal	2	48	15	0.75	2	4	Medium	2	0.666667	2
Umuahia South	1	27	2	2	8	1	2	Trader	Self Employed	3	48	2	2	2	17	103	16.0241	P75	Normal	Normal	1	17.5	Normal	Normal	2	50	15	0.75	2	4	Medium	2	0.666667	2
Umuahia South	1	33	2	2	8	1	2	Barber	Self Employed	3	58	2	1	2	15	110	12.3967	P1	Underweight	Abnormal	2	16	Normal	Normal	2	49	15	0.75	2	5	High	3	0.833333	1
Umuahia South	1	16	1	1	NA	#NULL!	2	STUDENT	Unemployed	1	48	2	2	2	18	104	16.642	P85	Overweight	Abnormal	2	16.2	Normal	Normal	2	52	11	0.55	1	4	Medium	2	0.666667	2
Umuahia South	1	17	1	1	NA	#NULL!	2	Trader	Self Employed	3	36	2	2	2	13	93	15.0306	P50	Normal	Normal	1	15	Normal	Normal	2	49	15	0.75	2	4	Medium	2	0.666667	2
Umuahia South	1	22	1	2	2	1	2	Hair Stylist	Self Employed	3	24	1	1	2	11	85	15.2249	P50	Normal	Normal	1	13	Normal	Normal	2	51	16	0.8	2	6	High	3	1	1
Umuahia South	1	34	2	2	14	2	2	Trader	Self Employed	3	58	2	2	2	17	104	15.7175	P75	Normal	Normal	1	16	Normal	Normal	2	52	16	0.8	2	5	High	3	0.833333	1
Umuahia South	1	36	3	2	9	1	2	Farmer	Self Employed	3	24	1	2	2	12	75	21.3333	P999	Obese	Abnormal	2	16	Normal	Normal	2	48	16	0.8	2	4	Medium	2	0.666667	2
Umuahia South	1	35	2	2	3	1	2	Farmer	Self Employed	3	29	2	2	2	12	75	21.3333	P999	Obese	Abnormal	2	15.5	Normal	Normal	2	50	12	0.6	1	4	Medium	2	0.666667	2
Umuahia South	1	32	2	2	17	2	2	Hair Stylist	Self Employed	3	10	1	2	2	8.75	47	39.6107	P999	Obese	Abnormal	2	14.5	Normal	Normal	2	41	16	0.8	2	4	Medium	2	0.666667	2
Umuahia South	1	23	1	2	4	1	2	Hair Stylist	Self Employed	3	8	1	1	2	7.48	64	18.2617	P85	Overweight	Abnormal	2	15.8	Normal	Normal	2	44	16	0.8	2	2	Low	1	0.333333	2
Umuahia South	1	19	1	2	1	1	2	Farmer	Self Employed	3	6	1	2	2	6.03	60	16.75	P50	Normal	Normal	1	14.5	Normal	Normal	2	43	16	0.8	2	2	Low	1	0.333333	2
Umuahia South	1	35	2	2	6	1	2	Hair Stylist	Self Employed	3	36	2	2	2	13	89	16.4121	P85	Overweight	Abnormal	2	15.3	Normal	Normal	2	48	15	0.75	2	3	Medium	2	0.5	2
Umuahia South	1	35	2	2	8	1	3	Hair Stylist	Self Employed	3	12	1	1	2	10	70	20.4082	P999	Obese	Abnormal	2	15	Normal	Normal	2	48	16	0.8	2	5	High	3	0.833333	1
Umuahia South	1	25	2	2	8	1	2	Unemployed	Unemployed	1	58	2	1	2	11	101	10.7833	P01	Underweight	Abnormal	2	15	Normal	Normal	2	51	17	0.85	2	6	High	3	1	1
Umuahia South	1	37	3	2	3	1	3	Trader	Self Employed	3	31	2	1	2	11	82	16.3593	P75	Normal	Normal	1	15.5	Normal	Normal	2	48	18	0.9	2	5	High	3	0.833333	1
Umuahia South	1	37	3	2	10	2	2	Farmer	Self Employed	3	48	2	2	1	16	98	16.6597	P85	Overweight	Abnormal	2	15	Normal	Normal	2	49	13	0.65	1	3	Medium	2	0.5	2
Umuahia South	1	28	2	2	6	1	2	Trader	Self Employed	3	24	1	1	1	10.4	91	12.5589	P01	Underweight	Abnormal	2	15.3	Normal	Normal	2	50	16	0.8	2	4	Medium	2	0.666667	2
Umuahia South	1	24	1	2	5	1	2	Teacher	Employed	2	24	1	1	1	13.9	88	17.9494	P95	Obese	Abnormal	2	14.3	Normal	Normal	2	49	15	0.75	2	4	Medium	2	0.666667	2
Umuahia South	1	28	2	2	7	1	2	Trader	Self Employed	3	36	2	1	1	13	86	17.5771	P95	Obese	Abnormal	2	15.6	Normal	Normal	2	49	16	0.8	2	4	Medium	2	0.666667	2
Umuahia South	1	41	3	2	8	1	2	Business	Self Employed	3	37	2	2	1	14.3	85	19.7924	P999	Obese	Abnormal	2	14.9	Normal	Normal	2	46	16	0.8	2	3	Medium	2	0.5	2
Umuahia South	1	37	3	2	5	1	1	Trader	Self Employed	3	24	1	1	1	13	72	25.0772	P999	Obese	Abnormal	2	14.2	Normal	Normal	2	48	17	0.85	2	1	Low	1	0.166667	2
Umuahia South	1	25	2	2	5	1	2	Trader	Self Employed	3	11	1	2	2	10	69	21.004	P999	Obese	Abnormal	2	13.5	Normal	Normal	2	46	18	0.9	2	1	Low	1	0.166667	2
Umuahia South	1	28	2	2	3	1	1	Business	Self Employed	3	19	1	1	2	10	82	14.8721	P25	Normal	Normal	1	14	Normal	Normal	2	46	18	0.9	2	1	Low	1	0.166667	2
Umuahia South	1	38	3	2	5	1	1	Trader	Self Employed	3	10	1	1	2	10	67	22.2767	P999	Obese	Abnormal	2	15	Normal	Normal	2	48	18	0.9	2	1	Low	1	0.166667	2
Umuahia South	1	34	2	2	10	2	1	Trader	Self Employed	3	36	2	2	2	15	86	20.2812	P999	Obese	Abnormal	2	15	Normal	Normal	2	48	18	0.9	2	1	Low	1	0.166667	2
Umuahia South	1	30	2	2	8	1	1	Business	Self Employed	3	24	1	2	1	11	69	23.1044	P999	Obese	Abnormal	2	14	Normal	Normal	2	46	19	0.95	2	2	Low	1	0.333333	2
Umuahia South	1	37	3	2	13	2	1	Trader	Self Employed	3	13	1	1	1	8.8	72	16.9753	P75	Normal	Normal	1	16.5	Normal	Normal	2	47	16	0.8	2	4	Medium	2	0.666667	2
Umuahia South	1	22	1	2	5	1	2	Trader	Self Employed	3	11	1	1	2	7.5	71	14.878	P5	Normal	Normal	1	14	Normal	Normal	2	76	14	0.7	2	3	Medium	2	0.5	2
Umuahia South	1	32	2	2	6	1	2	Trader	Self Employed	3	52	2	1	2	16	98	16.6597	P85	Overweight	Abnormal	2	16.5	Normal	Normal	2	45	15	0.75	2	5	High	3	0.833333	1
Umuahia South	1	29	2	2	6	1	2	Trader	Self Employed	3	8	1	2	2	5.13	69	10.775	P01	Underweight	Abnormal	2	15.5	Normal	Normal	2	46	11	0.55	1	2	Low	1	0.333333	2
Umuahia South	1	34	2	2	11	2	2	Trader	Self Employed	3	33	2	2	2	15	89	18.937	P99	Obese	Abnormal	2	16.5	Normal	Normal	2	45	12	0.6	1	4	Medium	2	0.666667	2
Umuahia South	1	23	1	2	1	1	2	Nurse	Employed	2	7	1	2	2	3.44	69	7.22537	P01	Underweight	Abnormal	2	13.5	Normal	Normal	2	44	12	0.6	1	6	High	3	1	1
Umuahia South	1	29	2	2	5	1	2	Nurse	Employed	2	26	2	2	2	10	65	23.6686	P999	Obese	Abnormal	2	14	Normal	Normal	2	44	16	0.8	2	6	High	3	1	1
Umuahia South	1	29	2	2	12	2	2	Trader	Self Employed	3	38	2	1	2	13	93	15.0306	P50	Normal	Normal	1	15	Normal	Normal	2	50	9	0.45	1	4	Medium	2	0.666667	2
Umuahia South	1	26	2	2	1	1	3	Civil servant	Employed	2	9	1	2	2	6.97	69	14.6398	P10	Normal	Normal	1	13	Normal	Normal	2	44	10	0.5	1	3	Medium	2	0.5	2
Umuahia South	1	30	2	2	2	1	3	Trader	Self Employed	3	12	1	2	2	9.78	71	19.4009	P99	Obese	Abnormal	2	17	Normal	Normal	2	42	12	0.6	1	5	High	3	0.833333	1
Umuahia South	1	62	3	1	NA	#NULL!	1	Farmer	Self Employed	3	14	1	1	2	7.7	69	16.1731	P50	Normal	Normal	1	12.5	MAM	GAM	1	44	14	0.7	2	5	High	3	0.833333	1
Umuahia South	1	31	2	1	NA	#NULL!	2	Trader	Self Employed	3	42	2	1	2	11	101	10.7833	P01	Underweight	Abnormal	2	14	Normal	Normal	2	48	8	0.4	1	2	Low	1	0.333333	2
Umuahia South	1	60	3	2	30	2	1	Sales girl	Self Employed	3	36	2	1	2	15	97	15.9422	P75	Normal	Normal	1	15	Normal	Normal	2	50	11	0.55	1	6	High	3	1	1
Umuahia South	1	25	2	1	NA	#NULL!	1	Trader	Self Employed	3	24	1	2	2	13	97	13.8166	P10	Normal	Normal	1	14.5	Normal	Normal	2	49	14	0.7	2	6	High	3	1	1
Umuahia South	1	28	2	2	10	2	2	Trader	Self Employed	3	36	2	1	2	10	90	12.3457	P1	Underweight	Abnormal	2	13	Normal	Normal	2	51	11	0.55	1	1	Low	1	0.166667	2
Umuahia South	1	39	3	2	13	2	2	Baker	Self Employed	3	48	2	1	2	16	101	15.6847	P75	Normal	Normal	1	15	Normal	Normal	2	49	7	0.35	1	5	High	3	0.833333	1
Umuahia South	1	21	1	2	3	1	1	Baker	Self Employed	3	48	2	2	2	13	86	17.5771	P95	Obese	Abnormal	2	14	Normal	Normal	2	47	12	0.6	1	4	Medium	2	0.666667	2
Umuahia South	1	30	2	2	4	1	3	Trader	Self Employed	3	16	1	2	2	9	76	15.5817	P50	Normal	Normal	1	13	Normal	Normal	2	47	14	0.7	2	5	High	3	0.833333	1
Umuahia South	1	34	2	2	9	1	2	Unemployed	Unemployed	1	12	1	2	2	12	98	12.4948	P01	Underweight	Abnormal	2	14.5	Normal	Normal	2	47	9	0.45	1	5	High	3	0.833333	1
Umuahia South	1	30	2	2	2	1	2	Unemployed	Unemployed	1	10	1	1	2	7	69	14.7028	P5	Normal	Normal	1	13	Normal	Normal	2	45	12	0.6	1	4	Medium	2	0.666667	2
Umuahia South	1	32	2	2	8	1	3	Hair Stylist	Self Employed	3	18	1	2	2	8	80	12.5	P1	Underweight	Abnormal	2	12.5	MAM	GAM	1	46	12	0.6	1	6	High	3	1	1
Umuahia South	1	35	2	2	7	1	2	Fashion Designer	Self Employed	3	28	2	2	2	11	89	13.8871	P10	Normal	Normal	1	14	Normal	Normal	2	47	12	0.6	1	6	High	3	1	1
Umuahia South	1	40	3	2	16	2	2	Trader	Self Employed	3	38	2	2	1	13	98	13.536	P10	Normal	Normal	1	14	Normal	Normal	2	51	12	0.6	1	6	High	3	1	1
Umuahia South	1	27	2	2	4	1	2	Unemployed	Unemployed	1	53	2	2	2	16	112	12.7551	P3	Underweight	Abnormal	2	16	Normal	Normal	2	47	13	0.65	1	6	High	3	1	1
Umuahia South	1	39	3	2	11	2	3	Unemployed	Unemployed	1	48	2	2	2	10	90	12.3457	P1	Underweight	Abnormal	2	13	Normal	Normal	2	45	12	0.6	1	5	High	3	0.833333	1
Umuahia South	1	32	2	2	6	1	2	Civil servant	Employed	2	48	2	2	2	10.6	92	12.5236	P3	Underweight	Abnormal	2	0.15	SAM	GAM	1	84	10	0.5	1	3	Medium	2	0.5	2
Umuahia South	1	31	2	2	13	2	2	Trader	Self Employed	3	29	2	1	2	14	96	15.191	P50	Normal	Normal	1	14	Normal	Normal	2	50	10	0.5	1	5	High	3	0.833333	1
Umuahia South	1	51	3	2	11	2	2	Trader	Self Employed	3	26	2	1	2	13	82	19.3337	P999	Obese	Abnormal	2	14	Normal	Normal	2	48	9	0.45	1	5	High	3	0.833333	1
Umuahia South	1	43	3	2	17	2	2	Unemployed	Unemployed	1	14	1	2	2	7.86	74	14.3535	P10	Normal	Normal	1	13	Normal	Normal	2	46	11	0.55	1	2	Low	1	0.333333	2
Umuahia South	1	35	2	2	9	1	2	Unemployed	Unemployed	1	12	1	1	2	19.4	72	37.4228	P999	Obese	Abnormal	2	14.5	Normal	Normal	2	43	12	0.6	1	4	Medium	2	0.666667	2
Umuahia South	1	32	2	2	10	2	1	Business	Self Employed	3	32	2	2	2	11	84	15.5896	P75	Normal	Normal	1	15	Normal	Normal	2	48	10	0.5	1	4	Medium	2	0.666667	2
Umuahia South	1	26	2	2	2	1	2	Fashion Designer	Self Employed	3	9	1	1	2	9	63	22.6757	P999	Obese	Abnormal	2	13	Normal	Normal	2	44	15	0.75	2	2	Low	1	0.333333	2
Umuahia South	1	28	2	1	1	1	2	Farmer	Self Employed	3	7	1	2	2	8	58	23.7812	P999	Obese	Abnormal	2	13	Normal	Normal	2	44	11	0.55	1	2	Low	1	0.333333	2
Umuahia South	1	40	3	1	4	1	1	Business	Self Employed	3	58	2	2	2	10.3	102	9.90004	P01	Underweight	Abnormal	2	14	Normal	Normal	2	50	11	0.55	1	4	Medium	2	0.666667	2
Umuahia South	1	31	2	2	3	1	3	Business	Self Employed	3	7	1	1	2	6	61	16.1247	P25	Normal	Normal	1	14	Normal	Normal	2	43	16	0.8	2	2	Low	1	0.333333	2
Umuahia South	1	34	2	2	10	2	2	Business	Self Employed	3	26	2	1	2	16	87	21.1389	P999	Obese	Abnormal	2	13	Normal	Normal	2	49	12	0.6	1	3	Medium	2	0.5	2
Umuahia South	1	23	1	2	2	1	2	Business	Self Employed	3	19	1	1	2	10	72	19.2901	P99	Obese	Abnormal	2	14	Normal	Normal	2	44	13	0.65	1	4	Medium	2	0.666667	2
Umuahia South	1	35	2	1	10	2	2	Health worker	Employed	2	23	1	1	2	12	78	19.7239	P999	Obese	Abnormal	2	14	Normal	Normal	2	49	11	0.55	1	3	Medium	2	0.5	2
Umuahia South	1	30	2	2	6	1	2	Health worker	Employed	2	54	2	2	2	10.5	105	9.52381	P01	Underweight	Abnormal	2	14.5	Normal	Normal	2	51	15	0.75	2	4	Medium	2	0.666667	2
Umuahia South	1	23	1	2	5	1	2	Business	Self Employed	3	11	1	2	1	8	61	21.4996	P999	Obese	Abnormal	2	13.2	Normal	Normal	2	42	14	0.7	2	3	Medium	2	0.5	2
Umuahia South	1	33	2	2	5	1	2	Fashion Designer	Self Employed	3	11	1	2	2	11	71	21.8211	P999	Obese	Abnormal	2	14	Normal	Normal	2	46	13	0.65	1	2	Low	1	0.333333	2
Umuahia South	1	38	3	2	6	1	3	Trader	Self Employed	3	30	2	1	2	11	86	14.8729	P25	Normal	Normal	1	0.51	SAM	GAM	1	12.3	19	0.95	2	3	Medium	2	0.5	2
Umuahia South	1	33	2	1	8	1	2	Hair Stylist	Self Employed	3	29	2	1	2	10	52	36.9822	P999	Obese	Abnormal	2	15	Normal	Normal	2	52	11	0.55	1	3	Medium	2	0.5	2
Umuahia South	1	39	3	2	5	1	2	Farmer	Self Employed	3	20	1	1	2	11	80	17.1875	P85	Overweight	Abnormal	2	12.3	MAM	GAM	1	51	16	0.8	2	3	Medium	2	0.5	2
Umuahia South	1	30	2	2	7	1	3	Business	Self Employed	3	42	2	2	2	10.3	81	15.6988	P75	Normal	Normal	1	14.5	Normal	Normal	2	51	15	0.75	2	4	Medium	2	0.666667	2
Umuahia South	1	32	2	2	16	2	2	Business	Self Employed	3	58	2	1	2	14	104	12.9438	P3	Underweight	Abnormal	2	14.5	Normal	Normal	2	49	12	0.6	1	4	Medium	2	0.666667	2
Umuahia South	1	32	2	2	10	2	3	Unemployed	Unemployed	1	24	1	1	2	12	75	21.3333	P999	Obese	Abnormal	2	14	Normal	Normal	2	48	15	0.75	2	4	Medium	2	0.666667	2
Umuahia South	1	27	2	2	5	1	3	Trader	Self Employed	3	15	1	2	2	11	68	23.7889	P999	Obese	Abnormal	2	13.8	Normal	Normal	2	45	17	0.85	2	4	Medium	2	0.666667	2
Umuahia South	1	32	2	2	10	2	2	Unemployed	Unemployed	1	48	2	1	2	14	80	21.875	P999	Obese	Abnormal	2	15	Normal	Normal	2	49	11	0.55	1	3	Medium	2	0.5	2
Umuahia South	1	22	1	2	3	1	2	Business	Self Employed	3	9	1	1	2	8	66	18.3655	P85	Overweight	Abnormal	2	12	MAM	GAM	1	44	15	0.75	2	3	Medium	2	0.5	2
Umuahia South	1	27	2	2	10	2	1	Business	Self Employed	3	29	2	1	1	10	68	21.6263	P999	Obese	Abnormal	2	11	SAM	GAM	1	44	17	0.85	2	3	Medium	2	0.5	2
Umuahia South	1	29	2	2	11	2	2	Business	Self Employed	3	40	2	2	2	12	86	16.225	P75	Normal	Normal	1	13	Normal	Normal	2	48	14	0.7	2	2	Low	1	0.333333	2
Umuahia South	1	25	2	2	6	1	2	Business	Self Employed	3	10	1	1	2	9.5	59	27.291	P999	Obese	Abnormal	2	13	Normal	Normal	2	40	16	0.8	2	2	Low	1	0.333333	2
Umuahia South	1	33	2	2	5	1	2	Farmer	Self Employed	3	25	2	1	2	15	93	17.343	P85	Overweight	Abnormal	2	14	Normal	Normal	2	47	18	0.9	2	3	Medium	2	0.5	2
Umuahia South	1	39	3	2	7	1	1	Caterer	Self Employed	3	10	1	2	2	10	64	24.4141	P999	Obese	Abnormal	2	15	Normal	Normal	2	42	19	0.95	2	3	Medium	2	0.5	2
Umuahia South	1	29	2	2	3	1	2	Business	Self Employed	3	8	1	1	1	7	62	18.2102	P85	Overweight	Abnormal	2	15.5	Normal	Normal	2	47	14	0.7	2	4	Medium	2	0.666667	2
Umuahia South	1	42	3	2	9	1	2	Business	Self Employed	3	20	1	2	1	10	74	18.2615	P97	Obese	Abnormal	2	14	Normal	Normal	2	46	15	0.75	2	3	Medium	2	0.5	2
Umuahia South	1	35	2	2	10	2	2	Business	Self Employed	3	19	1	2	2	9	70	18.3673	P97	Obese	Abnormal	2	15	Normal	Normal	2	47	14	0.7	2	4	Medium	2	0.666667	2
Umuahia South	1	45	3	2	22	2	2	Fashion Designer	Self Employed	3	29	2	1	1	11	77	18.5529	P99	Obese	Abnormal	2	15.5	Normal	Normal	2	47	15	0.75	2	2	Low	1	0.333333	2
Umuahia South	1	38	3	2	8	1	2	Artisan	Self Employed	3	22	1	2	1	11	77	18.5529	P99	Obese	Abnormal	2	16.5	Normal	Normal	2	50	15	0.75	2	4	Medium	2	0.666667	2
Umuahia South	1	23	1	2	2	1	2	Business	Self Employed	3	24	1	2	1	11	82	16.3593	P75	Normal	Normal	1	15.5	Normal	Normal	2	46	16	0.8	2	3	Medium	2	0.5	2
Umuahia South	1	35	2	2	5	1	2	Business	Self Employed	3	8	1	1	1	8	68	17.301	P75	Normal	Normal	1	15	Normal	Normal	2	46	15	0.75	2	2	Low	1	0.333333	2
Umuahia South	1	29	2	2	8	1	2	Teacher	Employed	2	12	1	2	1	8	61	21.4996	P999	Obese	Abnormal	2	14	Normal	Normal	2	48	14	0.7	2	3	Medium	2	0.5	2
Umuahia South	1	24	1	2	2	1	3	Business	Self Employed	3	12	1	2	2	6	66	13.7741	P3	Underweight	Abnormal	2	14.5	Normal	Normal	2	45	15	0.75	2	3	Medium	2	0.5	2
Umuahia South	1	25	2	2	7	1	2	Civil servant	Employed	2	20	1	2	2	10	83	14.5159	P25	Normal	Normal	1	14.5	Normal	Normal	2	45	16	0.8	2	5	High	3	0.833333	1
Umuahia South	1	37	3	2	8	1	3	Trader	Self Employed	3	21	1	2	2	10	82	14.8721	P50	Normal	Normal	1	14	Normal	Normal	2	51	17	0.85	2	4	Medium	2	0.666667	2
Umuahia South	1	24	1	2	3	1	2	Teacher	Employed	2	31	2	1	1	12	91	14.491	P15	Normal	Normal	1	15	Normal	Normal	2	50	14	0.7	2	4	Medium	2	0.666667	2
Umuahia South	1	31	2	2	4	1	2	Civil servant	Employed	2	27	2	1	2	10.3	82	15.3183	P50	Normal	Normal	1	14.5	Normal	Normal	2	48	16	0.8	2	4	Medium	2	0.666667	2
Umuahia South	1	35	2	2	4	1	2	Civil servant	Employed	2	31	2	1	1	13	85	17.9931	P95	Obese	Abnormal	2	15.5	Normal	Normal	2	50	17	0.85	2	5	High	3	0.833333	1
Umuahia South	1	35	2	2	8	1	2	Farmer	Self Employed	3	53	2	2	1	13	102	12.4952	P3	Underweight	Abnormal	2	13.5	Normal	Normal	2	47	15	0.75	2	4	Medium	2	0.666667	2
Umuahia South	1	30	2	2	3	1	2	Trader	Self Employed	3	20	1	2	2	11	74	20.0877	P999	Obese	Abnormal	2	15	Normal	Normal	2	16	19	0.95	2	3	Medium	2	0.5	2
Umuahia South	1	40	3	2	8	1	2	Unemployed	Unemployed	1	29	2	2	2	11	80	17.1875	P90	Overweight	Abnormal	2	15	Normal	Normal	2	49	18	0.9	2	2	Low	1	0.333333	2
Umuahia South	1	32	2	2	10	2	2	Unemployed	Unemployed	1	29	2	2	1	9	64	21.9727	P999	Obese	Abnormal	2	0.46	SAM	GAM	1	46	14	0.7	2	1	Low	1	0.166667	2
Umuahia South	1	27	2	2	2	1	3	Fashion Designer	Self Employed	3	20	1	1	2	10	77	16.8663	P75	Normal	Normal	1	14	Normal	Normal	2	47	18	0.9	2	3	Medium	2	0.5	2
Umuahia South	1	42	3	2	16	2	2	Fashion Designer	Self Employed	3	20	1	1	1	10	51	38.4468	P999	Obese	Abnormal	2	12	MAM	GAM	1	47	19	0.95	2	2	Low	1	0.333333	2
Umuahia South	1	40	3	2	5	1	2	Marketer	Self Employed	3	29	2	1	2	10	55	33.0579	P999	Obese	Abnormal	2	15	Normal	Normal	2	42	19	0.95	2	2	Low	1	0.333333	2
Umuahia South	1	34	2	2	9	1	2	Teacher	Employed	2	23	1	2	1	10	75	17.7778	P95	Obese	Abnormal	2	13.5	Normal	Normal	2	46	16	0.8	2	3	Medium	2	0.5	2
Umuahia South	1	29	2	2	4	1	3	Teacher	Employed	2	29	2	1	1	12	88.7	15.2523	P50	Normal	Normal	1	13.1	Normal	Normal	2	47	17	0.85	2	3	Medium	2	0.5	2
Umuahia South	1	35	2	2	12	2	3	Trader	Self Employed	3	34	2	2	1	14	88	18.0785	P97	Obese	Abnormal	2	13.9	Normal	Normal	2	49	14	0.7	2	2	Low	1	0.333333	2
Umuahia South	1	21	1	2	2	1	2	Farmer	Self Employed	3	22	1	2	1	12	78	19.7239	P999	Obese	Abnormal	2	13.6	Normal	Normal	2	78	14	0.7	2	3	Medium	2	0.5	2
Umuahia South	1	36	3	2	10	2	1	Farmer	Self Employed	3	28	2	1	1	10	78	16.4366	P75	Normal	Normal	1	13	Normal	Normal	2	44	15	0.75	2	1	Low	1	0.166667	2
Umuahia South	1	39	3	2	2	1	3	Farmer	Self Employed	3	30	2	1	2	12	84	17.0068	P85	Overweight	Abnormal	2	13	Normal	Normal	2	84	16	0.8	2	4	Medium	2	0.666667	2
Umuahia South	1	53	3	1	NA	#NULL!	1	Trader	Self Employed	3	48	2	1	1	15	110	12.3967	P1	Underweight	Abnormal	2	15	Normal	Normal	2	53	12	0.6	1	2	Low	1	0.333333	2
Umuahia South	1	44	3	2	18	2	1	Trader	Self Employed	3	48	2	1	1	21	101	20.5862	P999	Obese	Abnormal	2	15.1	Normal	Normal	2	48	15	0.75	2	3	Medium	2	0.5	2
Umuahia South	1	38	3	2	15	2	2	Hair Stylist	Self Employed	3	12	1	1	1	9.5	77	16.0229	P50	Normal	Normal	1	14.7	Normal	Normal	2	46	15	0.75	2	2	Low	1	0.333333	2
Umuahia South	1	36	3	2	2	1	2	Trader	Self Employed	3	23	1	2	2	14	81	21.3382	P999	Obese	Abnormal	2	14.9	Normal	Normal	2	47	15	0.75	2	2	Low	1	0.333333	2
Umuahia South	1	40	3	2	15	2	3	Farmer	Self Employed	3	25	2	1	1	11	81	16.7657	P75	Normal	Normal	1	14	Normal	Normal	2	48	16	0.8	2	3	Medium	2	0.5	2
Umuahia South	1	36	3	2	3	1	2	Trader	Self Employed	3	35	2	2	1	14	101	13.7241	P10	Normal	Normal	1	15.7	Normal	Normal	2	48	15	0.75	2	2	Low	1	0.333333	2
Umuahia South	1	27	2	2	1	1	2	Fashion Designer	Self Employed	3	6	1	2	1	5.7	65.5	13.2859	P1	Underweight	Abnormal	2	12.8	Normal	Normal	2	42	13	0.65	1	1	Low	1	0.166667	2
Umuahia South	1	45	3	2	5	1	2	Trader	Self Employed	3	24	1	1	2	13	85	17.9931	P95	Obese	Abnormal	2	14.5	Normal	Normal	2	47	16	0.8	2	4	Medium	2	0.666667	2
Umuahia South	1	39	3	2	12	2	2	Trader	Self Employed	3	48	2	1	1	19	99	19.3858	P999	Obese	Abnormal	2	15.5	Normal	Normal	2	48	16	0.8	2	4	Medium	2	0.666667	2
Umuahia South	1	38	3	2	4	1	2	Trader	Self Employed	3	18	1	2	2	9	78	14.7929	P25	Normal	Normal	1	14.5	Normal	Normal	2	46	15	0.75	2	4	Medium	2	0.666667	2
Umuahia South	1	28	2	2	3	1	2	Trader	Self Employed	3	42	2	1	2	14	99	14.2843	P25	Normal	Normal	1	16.6	Normal	Normal	2	49	11	0.55	1	6	High	3	1	1
Umuahia South	1	28	2	2	7	1	2	Trader	Self Employed	3	28	2	2	2	12	85	16.609	P85	Overweight	Abnormal	2	14.7	Normal	Normal	2	48	14	0.7	2	5	High	3	0.833333	1
Umuahia South	1	28	2	1	NA	#NULL!	3	Trader	Self Employed	3	25	2	2	2	11	87	14.533	P25	Normal	Normal	1	15.5	Normal	Normal	2	48	13	0.65	1	5	High	3	0.833333	1
Umuahia South	1	38	3	2	2	1	3	CIVIL SERVANT	Employed	2	6	1	1	2	6.52	64	15.918	P25	Normal	Normal	1	14.5	Normal	Normal	2	42	17	0.85	2	3	Medium	2	0.5	2
Umuahia South	1	39	3	2	7	1	3	Fashion Designer	Self Employed	3	51	2	1	2	20	93	23.1241	P999	Obese	Abnormal	2	16	Normal	Normal	2	56	19	0.95	2	4	Medium	2	0.666667	2
Umuahia South	1	27	2	2	4	1	2	Fashion Designer	Self Employed	3	10	1	2	2	6.7	66	15.3811	P25	Normal	Normal	1	13.8	Normal	Normal	2	44	14	0.7	2	3	Medium	2	0.5	2
Umuahia South	1	32	2	2	3	1	2	Trader	Self Employed	3	51	2	2	2	14	98	14.5773	P50	Normal	Normal	1	14.2	Normal	Normal	2	49	12	0.6	1	5	High	3	0.833333	1
Umuahia South	1	30	2	2	14	2	2	Fashion Designer	Self Employed	3	47	2	2	2	14	98	14.5773	P50	Normal	Normal	1	14.9	Normal	Normal	2	48	14	0.7	2	5	High	3	0.833333	1
Umuahia South	1	22	1	1	NA	#NULL!	2	CIVIL SERVANT	Employed	2	58	2	2	2	20	108	17.1468	P90	Overweight	Abnormal	2	16.5	Normal	Normal	2	49	16	0.8	2	3	Medium	2	0.5	2
Umuahia South	1	48	3	2	25	2	2	Farmer	Self Employed	3	47	2	1	2	16	106	14.2399	P25	Normal	Normal	1	15.7	Normal	Normal	2	49	14	0.7	2	4	Medium	2	0.666667	2
Umuahia South	1	34	2	2	8	1	3	Farmer	Self Employed	3	54	2	2	2	17	107	14.8485	P50	Normal	Normal	1	15.5	Normal	Normal	2	54	14	0.7	2	6	High	3	1	1
Umuahia South	1	38	3	2	8	1	2	Trader	Self Employed	3	12	1	2	2	8	67	17.8213	P85	Overweight	Abnormal	2	13.2	Normal	Normal	2	46	14	0.7	2	3	Medium	2	0.5	2
Umuahia South	1	36	3	2	14	2	2	Hair Stylist	Self Employed	3	39	2	1	2	14	90	17.284	P95	Obese	Abnormal	2	16	Normal	Normal	2	48	18	0.9	2	6	High	3	1	1
Umuahia South	1	23	1	2	3	1	2	Fashion Designer	Self Employed	3	12	1	1	2	8.82	74	16.1066	P50	Normal	Normal	1	14.5	Normal	Normal	2	48	17	0.85	2	3	Medium	2	0.5	2
Umuahia South	1	31	2	2	1	1	2	Teacher	Employed	2	9	1	1	2	9	74	16.4354	P50	Normal	Normal	1	15.5	Normal	Normal	2	49	17	0.85	2	3	Medium	2	0.5	2
Umuahia South	1	26	2	2	3	1	2	Trader	Self Employed	3	18	1	1	2	11	81	16.7657	P75	Normal	Normal	1	15	Normal	Normal	2	48	18	0.9	2	6	High	3	1	1
Umuahia South	1	35	2	2	5	1	2	Hair Stylist	Self Employed	3	11	1	1	2	6.8	65	16.0947	P50	Normal	Normal	1	13	Normal	Normal	2	44	14	0.7	2	3	Medium	2	0.5	2
Umuahia South	1	23	1	2	3	1	2	Trader	Self Employed	3	24	1	1	2	15	89	18.937	P99	Obese	Abnormal	2	16	Normal	Normal	2	49	16	0.8	2	1	Low	1	0.166667	2
Umuahia South	1	27	2	2	5	1	1	Trader	Self Employed	3	24	1	2	1	12	82	17.8465	P95	Obese	Abnormal	2	14.5	Normal	Normal	2	47	17	0.85	2	1	Low	1	0.166667	2
Umuahia South	1	39	3	2	13	2	1	Hair Stylist	Self Employed	3	36	2	2	2	13.2	91	15.9401	P75	Normal	Normal	1	14	Normal	Normal	2	47	18	0.9	2	2	Low	1	0.333333	2
Umuahia South	1	35	2	2	5	1	2	Farmer	Self Employed	3	9	1	2	2	9	61	24.187	P999	Obese	Abnormal	2	13	Normal	Normal	2	46	13	0.65	1	2	Low	1	0.333333	2
Umuahia South	1	46	3	2	20	2	2	Business	Self Employed	3	7	1	2	2	9	59	25.8546	P999	Obese	Abnormal	2	14	Normal	Normal	2	41	17	0.85	2	2	Low	1	0.333333	2
Umuahia South	1	28	2	2	6	1	2	Trader	Self Employed	3	48	2	1	1	10.2	89	12.8772	P3	Underweight	Abnormal	2	14.7	Normal	Normal	2	51	15	0.75	2	1	Low	1	0.166667	2
Umuahia South	1	38	3	2	12	2	3	Trader	Self Employed	3	23	1	2	2	8	79	12.8185	P3	Underweight	Abnormal	2	11.9	MAM	GAM	1	46	14	0.7	2	5	High	3	0.833333	1
Umuahia South	1	39	3	1	11	2	2	Civil servant	Employed	2	30	2	1	2	12	92	14.1777	P10	Normal	Normal	1	16.3	Normal	Normal	2	49	17	0.85	2	2	Low	1	0.333333	2
Umuahia South	1	40	3	2	3	1	3	Teacher	Employed	2	12	1	2	2	9	68	19.4637	P99	Obese	Abnormal	2	13.5	Normal	Normal	2	45	14	0.7	2	2	Low	1	0.333333	2
Umuahia South	1	33	2	2	8	1	2	Caterer	Self Employed	3	36	2	2	2	14	87	18.4965	P99	Obese	Abnormal	2	16	Normal	Normal	2	46	15	0.75	2	2	Low	1	0.333333	2
Umuahia South	1	43	3	2	20	2	1	Business	Self Employed	3	24	1	1	2	18	70	36.7347	P999	Obese	Abnormal	2	13	Normal	Normal	2	46	19	0.95	2	2	Low	1	0.333333	2
Umuahia South	1	29	2	2	3	1	3	Trader	Self Employed	3	18	1	2	2	15	90	18.5185	P97	Obese	Abnormal	2	14	Normal	Normal	2	49	14	0.7	2	2	Low	1	0.333333	2
Umuahia South	1	26	2	2	4	1	2	Trader	Self Employed	3	36	2	2	2	15	88	19.3698	P999	Obese	Abnormal	2	15	Normal	Normal	2	49	14	0.7	2	2	Low	1	0.333333	2
Umuahia South	1	38	3	2	12	2	2	Trader	Self Employed	3	24	1	2	2	11	78	18.0802	P95	Obese	Abnormal	2	14	Normal	Normal	2	46	12	0.6	1	2	Low	1	0.333333	2
Umuahia South	1	28	2	2	5	1	2	Trader	Self Employed	3	18	1	1	2	11	67	24.5043	P999	Obese	Abnormal	2	14.5	Normal	Normal	2	45	17	0.85	2	5	High	3	0.833333	1
Umuahia South	1	32	2	2	10	2	3	Student	Unemployed	1	28	2	1	2	14	86	18.9292	P99	Obese	Abnormal	2	16.2	Normal	Normal	2	48	15	0.75	2	4	Medium	2	0.666667	2
Umuahia South	1	22	1	2	4	1	2	Hair Stylist	Self Employed	3	22	1	1	2	8	80	12.5	P01	Underweight	Abnormal	2	16.5	Normal	Normal	2	49	18	0.9	2	5	High	3	0.833333	1
Umuahia South	1	28	2	2	14	2	2	Farmer	Self Employed	3	8	1	2	2	6.36	64	15.5273	P25	Normal	Normal	1	13.5	Normal	Normal	2	45	17	0.85	2	5	High	3	0.833333	1
Umuahia South	1	35	2	2	7	1	2	Farmer	Self Employed	3	48	2	1	2	16	104	14.7929	P50	Normal	Normal	1	15.7	Normal	Normal	2	51	15	0.75	2	5	High	3	0.833333	1
Umuahia South	1	42	3	2	15	2	2	Trader	Self Employed	3	24	1	2	2	11	84	15.5896	P50	Normal	Normal	1	16	Normal	Normal	2	49	18	0.9	2	5	High	3	0.833333	1
Umuahia South	1	35	2	2	13	2	2	Trader	Self Employed	3	48	2	2	2	12	89	15.1496	P50	Normal	Normal	1	15	Normal	Normal	2	49	18	0.9	2	5	High	3	0.833333	1
Umuahia South	1	40	3	2	12	2	2	Trader	Self Employed	3	58	2	1	2	11	101	10.7833	P01	Underweight	Abnormal	2	14.5	Normal	Normal	2	50	15	0.75	2	5	High	3	0.833333	1
Umuahia South	1	26	2	2	9	1	2	Trader	Self Employed	3	10	1	2	2	9	50	36	P999	Obese	Abnormal	2	13	Normal	Normal	2	43	16	0.8	2	5	High	3	0.833333	1
Umuahia South	1	38	3	2	14	2	2	Trader	Self Employed	3	24	1	1	2	12	84	17.0068	P85	Overweight	Abnormal	2	15.8	Normal	Normal	2	49	15	0.75	2	5	High	3	0.833333	1
Umuahia South	1	30	2	2	7	1	2	Food vendor	Self Employed	3	12	1	1	1	8	70	16.3265	P50	Normal	Normal	1	12	MAM	GAM	1	46	14	0.7	2	1	Low	1	0.166667	2
Umuahia South	1	43	3	2	15	2	2	Trader	Self Employed	3	48	2	1	2	15	110	12.3967	P1	Underweight	Abnormal	2	14.6	Normal	Normal	2	51	15	0.75	2	5	High	3	0.833333	1
Umuahia South	1	38	3	2	12	2	2	Trader	Self Employed	3	44	2	2	2	12	99	12.2436	P1	Underweight	Abnormal	2	15.9	Normal	Normal	2	50	14	0.7	2	5	High	3	0.833333	1
Umuahia South	1	32	2	2	7	1	2	Trader	Self Employed	3	21	1	2	2	9	80	14.0625	P15	Normal	Normal	1	14.5	Normal	Normal	2	50	17	0.85	2	5	High	3	0.833333	1
Umuahia South	1	35	2	2	12	2	3	Hair Stylist	Self Employed	3	31	2	2	2	11	93	12.7182	P1	Underweight	Abnormal	2	15.1	Normal	Normal	2	47	16	0.8	2	5	High	3	0.833333	1
Umuahia South	1	38	3	2	12	2	3	Teacher	Employed	2	18	1	1	2	8.7	73	16.3258	P75	Normal	Normal	1	14.2	Normal	Normal	2	47	16	0.8	2	4	Medium	2	0.666667	2
Umuahia South	1	44	3	2	20	2	3	Trader	Self Employed	3	31	2	1	1	10	83	14.5159	P25	Normal	Normal	1	16.2	Normal	Normal	2	50	15	0.75	2	3	Medium	2	0.5	2
Umuahia South	1	30	2	2	8	1	2	Trader	Self Employed	3	32	2	2	2	14	105	12.6984	P1	Underweight	Abnormal	2	16.5	Normal	Normal	2	50	16	0.8	2	5	High	3	0.833333	1
Umuahia South	1	34	2	2	10	2	2	Farmer	Self Employed	3	36	2	1	2	10	86	13.5208	P5	Normal	Normal	1	16.2	Normal	Normal	2	49	16	0.8	2	5	High	3	0.833333	1
Umuahia South	1	39	3	2	9	1	3	Designer	Self Employed	3	36	2	1	2	14	87	18.4965	P99	Obese	Abnormal	2	15	Normal	Normal	2	47	15	0.75	2	2	Low	1	0.333333	2
Umuahia South	1	27	2	2	7	1	2		Unemployed	1	24	1	2	2	11	78	18.0802	P95	Obese	Abnormal	2	13	Normal	Normal	2	46	19	0.95	2	2	Low	1	0.333333	2
Umuahia South	1	26	2	2	8	1	2	Trader	Self Employed	3	10	1	2	2	8	70	16.3265	P50	Normal	Normal	1	14.2	Normal	Normal	2	43	14	0.7	2	3	Medium	2	0.5	2
Umuahia South	1	36	3	2	10	2	2	Trader	Self Employed	3	39	2	2	2	10	88	12.9132	P3	Underweight	Abnormal	2	14	Normal	Normal	2	49	15	0.75	2	5	High	3	0.833333	1
Umuahia South	1	27	2	2	8	1	2	Trader	Self Employed	3	51	2	1	2	12	104	11.0947	P01	Underweight	Abnormal	2	13.2	Normal	Normal	2	51	11	0.55	1	5	High	3	0.833333	1
Umuahia South	1	39	3	2	12	2	2	Trader	Self Employed	3	44	2	2	2	11	96	11.9358	P1	Underweight	Abnormal	2	15	Normal	Normal	2	50	14	0.7	2	5	High	3	0.833333	1
Umuahia South	1	35	2	2	27	2	2	Trader	Self Employed	3	57	2	2	2	13	105	11.7914	P1	Underweight	Abnormal	2	15	Normal	Normal	2	52	13	0.65	1	5	High	3	0.833333	1
Umuahia South	1	23	1	2	3	1	2	Trader	Self Employed	3	14	1	1	1	7	78	11.5056	P01	Underweight	Abnormal	2	14.5	Normal	Normal	2	46	15	0.75	2	5	High	3	0.833333	1
Umuahia South	1	39	3	2	15	2	2	Trader	Self Employed	3	17	1	2	2	11	79	17.6254	P90	Overweight	Abnormal	2	14.5	Normal	Normal	2	40	16	0.8	2	5	High	3	0.833333	1
Umuahia South	1	43	3	2	16	2	2	Trader	Self Employed	3	50	2	2	2	12	100	12	P1	Underweight	Abnormal	2	14.6	Normal	Normal	2	49	17	0.85	2	5	High	3	0.833333	1
Umuahia South	1	24	1	2	6	1	2	Trader	Self Employed	3	16	1	1	2	7	72	13.5031	P1	Underweight	Abnormal	2	14.2	Normal	Normal	2	48	15	0.75	2	5	High	3	0.833333	1
Umuahia South	1	37	3	2	15	2	2	Trader	Self Employed	3	58	2	1	2	11	97	11.6909	P01	Underweight	Abnormal	2	16.5	Normal	Normal	2	49	15	0.75	2	5	High	3	0.833333	1
Umuahia South	1	34	2	2	15	2	2	Unemployed	Unemployed	1	48	2	2	2	11	107	9.60783	P01	Underweight	Abnormal	2	16	Normal	Normal	2	49	17	0.85	2	5	High	3	0.833333	1
Umuahia South	1	35	2	2	15	2	2	Teacher	Employed	2	39	2	1	2	11	96	11.9358	P01	Underweight	Abnormal	2	15.2	Normal	Normal	2	52	15	0.75	2	5	High	3	0.833333	1
Umuahia South	1	35	2	2	10	2	2	Trader	Self Employed	3	58	2	1	2	11	98	11.4536	P01	Underweight	Abnormal	2	14.7	Normal	Normal	2	49	13	0.65	1	5	High	3	0.833333	1
Umuahia South	1	25	2	2	7	1	2	Unemployed	Unemployed	1	56	2	1	2	19	104	17.5666	P95	Obese	Abnormal	2	17	Normal	Normal	2	49	14	0.7	2	5	High	3	0.833333	1
Umuahia South	1	26	2	2	3	1	3	Hair Stylist	Self Employed	3	12	1	2	2	9	75	16	P50	Normal	Normal	1	14	Normal	Normal	2	48	12	0.6	1	5	High	3	0.833333	1
Umuahia South	1	41	3	2	15	2	2	Trader	Self Employed	3	11	1	1	2	8	75	14.2222	P3	Underweight	Abnormal	2	12.5	MAM	GAM	1	45	15	0.75	2	6	High	3	1	1
Umuahia South	1	19	1	1	NA	#NULL!	2	Trader	Self Employed	3	21	1	1	2	9	83	13.0643	P1	Underweight	Abnormal	2	14	Normal	Normal	2	47	10	0.5	1	6	High	3	1	1
Umuahia South	1	50	3	1	NA	#NULL!	2	Trader	Self Employed	3	34	2	2	1	7	72	13.5031	P10	Normal	Normal	1	10.5	SAM	GAM	1	37	8	0.4	1	1	Low	1	0.166667	2
Umuahia South	1	32	2	2	7	1	2	Trader	Self Employed	3	10	1	2	2	10	86	13.5208	P1	Underweight	Abnormal	2	13.5	Normal	Normal	2	46	13	0.65	1	4	Medium	2	0.666667	2
Umuahia South	1	37	3	2	9	1	2	Trader	Self Employed	3	48	2	1	2	16	102	15.3787	P75	Normal	Normal	1	18.5	Normal	Normal	2	47	12	0.6	1	4	Medium	2	0.666667	2
Umuahia South	1	29	2	2	7	1	2	Trader	Self Employed	3	36	2	1	2	12	94	13.5808	P5	Normal	Normal	1	13.5	Normal	Normal	2	49	14	0.7	2	6	High	3	1	1
Umuahia South	1	30	2	2	11	2	2	Trader	Self Employed	3	16	1	1	2	5	67	11.1383	P01	Underweight	Abnormal	2	11	SAM	GAM	1	42	12	0.6	1	2	Low	1	0.333333	2
Umuahia South	1	36	3	2	7	1	2	Teacher	Employed	2	42	2	2	2	15	98	15.6185	P75	Normal	Normal	1	15	Normal	Normal	2	49	14	0.7	2	5	High	3	0.833333	1
Umuahia South	1	32	2	2	6	1	3	Trader	Self Employed	3	20	1	1	2	12	86	16.225	P75	Normal	Normal	1	15	Normal	Normal	2	47	16	0.8	2	5	High	3	0.833333	1
Umuahia South	1	38	3	2	7	1	3	Trader	Self Employed	3	13	1	2	2	13	91	15.6986	P50	Normal	Normal	1	16	Normal	Normal	2	46	11	0.55	1	6	High	3	1	1
Umuahia South	1	37	3	2	3	1	2	Civil servant	Employed	2	23	1	2	2	10	90	12.3457	P1	Underweight	Abnormal	2	14	Normal	Normal	2	48	13	0.65	1	6	High	3	1	1
Umuahia South	1	36	3	2	16	2	1	Unemployed	Unemployed	1	36	2	1	2	12	93	13.8744	P10	Normal	Normal	1	13	Normal	Normal	2	46	12	0.6	1	5	High	3	0.833333	1
Umuahia South	1	28	2	2	3	1	1	Trader	Self Employed	3	8	1	2	1	7	60	19.4444	P95	Obese	Abnormal	2	13.5	Normal	Normal	2	40	14	0.7	2	5	High	3	0.833333	1
Umuahia South	1	27	2	2	9	1	2	Teacher	Employed	2	36	2	1	2	14	100	14	P10	Normal	Normal	1	14	Normal	Normal	2	48	11	0.55	1	5	High	3	0.833333	1
Umuahia South	1	31	2	2	6	1	2	Teacher	Employed	2	48	2	1	2	20	108	17.1468	P95	Obese	Abnormal	2	16.5	Normal	Normal	2	52	13	0.65	1	6	High	3	1	1
Umuahia South	1	35	2	2	15	2	2	Trader	Self Employed	3	18	1	1	2	9	72	17.3611	P85	Overweight	Abnormal	2	13	Normal	Normal	2	45	19	0.95	2	1	Low	1	0.166667	2
Umuahia South	1	28	2	2	5	1	2	Fashion Designer	Self Employed	3	38	2	2	2	15	82	22.3081	P999	Obese	Abnormal	2	15	Normal	Normal	2	46	14	0.7	2	2	Low	1	0.333333	2
Umuahia South	1	35	2	2	4	1	1	Caterer	Self Employed	3	20	1	1	2	10	74	18.2615	P95	Obese	Abnormal	2	15	Normal	Normal	2	45	19	0.95	2	2	Low	1	0.333333	2
Umuahia South	1	31	2	2	6	1	2	Fashion Designer	Self Employed	3	24	1	2	2	9	76	15.5817	P50	Normal	Normal	1	14	Normal	Normal	2	44	14	0.7	2	2	Low	1	0.333333	2
Umuahia South	1	39	3	2	6	1	2	Teacher	Employed	2	20	1	1	2	10	82	14.8721	P25	Normal	Normal	1	15	Normal	Normal	2	49	13	0.65	1	2	Low	1	0.333333	2
Umuahia South	1	34	2	2	4	1	3	Farmer	Self Employed	3	12	1	1	2	10	65	23.6686	P999	Obese	Abnormal	2	16	Normal	Normal	2	46	13	0.65	1	2	Low	1	0.333333	2
Umuahia South	1	24	1	2	6	1	2	Farmer	Self Employed	3	24	1	2	2	10	77	16.8663	P85	Overweight	Abnormal	2	15	Normal	Normal	2	46	18	0.9	2	2	Low	1	0.333333	2
Umuahia South	1	39	3	2	9	1	1	Trader	Self Employed	3	25	2	1	1	11	82	16.3593	P75	Normal	Normal	1	15	Normal	Normal	2	46	19	0.95	2	2	Low	1	0.333333	2
Umuahia South	1	30	2	2	3	1	2	Farmer	Self Employed	3	14	1	1	2	13	87	17.1753	P75	Normal	Normal	1	16	Normal	Normal	2	46	14	0.7	2	2	Low	1	0.333333	2
Umuahia South	1	32	2	2	3	1	2	Fashion Designer	Self Employed	3	9	1	1	2	9	64	21.9727	P999	Obese	Abnormal	2	13	Normal	Normal	2	44	18	0.9	2	2	Low	1	0.333333	2
Umuahia South	1	30	2	2	6	1	2	Trader	Self Employed	3	12	1	1	2	10	68	21.6263	P999	Obese	Abnormal	2	15	Normal	Normal	2	47	16	0.8	2	2	Low	1	0.333333	2
Umuahia South	1	38	3	2	6	1	2	Trader	Self Employed	3	22	1	1	1	7	67	15.5937	P50	Normal	Normal	1	14	Normal	Normal	2	46	18	0.9	2	1	Low	1	0.166667	2
Umuahia South	1	22	1	2	5	1	2	Trader	Self Employed	3	16	1	2	2	8	69	16.8032	P75	Normal	Normal	1	13	Normal	Normal	2	44	14	0.7	2	2	Low	1	0.333333	2
Umuahia South	1	34	2	2	5	1	2	Trader	Self Employed	3	36	2	2	2	12	74	21.9138	P999	Obese	Abnormal	2	12.8	Normal	Normal	2	47	16	0.8	2	4	Medium	2	0.666667	2
Umuahia South	1	36	3	2	6	1	2	Housewife	Unemployed	1	36	2	2	2	11	88	14.2045	P25	Normal	Normal	1	13	Normal	Normal	2	47	15	0.75	2	2	Low	1	0.333333	2
Umuahia South	1	21	1	2	4	1	2	Student	Unemployed	1	24	1	1	1	9	87	11.8906	P01	Underweight	Abnormal	2	13	Normal	Normal	2	49	13	0.65	1	3	Medium	2	0.5	2
Umuahia South	1	17	1	1	NA	#NULL!	2	Trader	Self Employed	3	12	1	1	1	10	73	18.7652	P95	Obese	Abnormal	2	13	Normal	Normal	2	47	14	0.7	2	1	Low	1	0.166667	2
Umuahia South	1	30	2	2	12	2	2	Farmer	Self Employed	3	25	2	1	1	9	75	16	P50	Normal	Normal	1	12.4	MAM	GAM	1	47	16	0.8	2	3	Medium	2	0.5	2
Umuahia South	1	29	2	2	6	1	2	Unemployed	Unemployed	1	21	1	2	1	9	63	22.6757	P999	Obese	Abnormal	2	12	MAM	GAM	1	45	15	0.75	2	2	Low	1	0.333333	2
Umuahia South	1	27	2	2	1	1	2	Hair Stylist	Self Employed	3	6	1	2	2	6	47	27.1616	P999	Obese	Abnormal	2	13.6	Normal	Normal	2	43	16	0.8	2	1	Low	1	0.166667	2
Umuahia South	1	30	2	2	4	1	3	Trader	Self Employed	3	35	2	2	2	13	99	13.264	P5	Normal	Normal	1	14.6	Normal	Normal	2	48	17	0.85	2	4	Medium	2	0.666667	2
Umuahia South	1	39	3	2	11	2	2	Farmer	Self Employed	3	40	2	2	1	13	79	20.83	P999	Obese	Abnormal	2	14.9	Normal	Normal	2	49	17	0.85	2	3	Medium	2	0.5	2
Umuahia South	1	50	3	2	33	2	1	Farmer	Self Employed	3	27	2	2	1	11	81	16.7657	P85	Overweight	Abnormal	2	13.5	Normal	Normal	2	50	9	0.45	1	4	Medium	2	0.666667	2
Umuahia South	1	39	3	2	13	2	3	Student	Unemployed	1	45	2	2	2	14	93	16.1868	P75	Normal	Normal	1	14	Normal	Normal	2	48	16	0.8	2	4	Medium	2	0.666667	2
Umuahia South	1	36	3	2	6	1	2	Trader	Self Employed	3	36	2	1	1	12	73	22.5183	P999	Obese	Abnormal	2	15.5	Normal	Normal	2	48	16	0.8	2	4	Medium	2	0.666667	2
Umuahia South	1	29	2	2	7	1	3	Trader	Self Employed	3	31	2	1	1	14	94	15.8443	P75	Normal	Normal	1	13.5	Normal	Normal	2	48	15	0.75	2	3	Medium	2	0.5	2
Umuahia South	1	32	2	2	10	2	1	Hair Stylist	Self Employed	3	36	2	2	1	13.8	101	13.5281	P10	Normal	Normal	1	15	Normal	Normal	2	47	13	0.65	1	3	Medium	2	0.5	2
Umuahia South	1	33	2	2	9	1	2	Hair Stylist	Self Employed	3	7	1	2	2	6	67.2	13.2866	P1	Underweight	Abnormal	2	14	Normal	Normal	2	45	17	0.85	2	1	Low	1	0.166667	2
Umuahia South	1	28	2	2	4	1	3	Teacher	Employed	2	8	1	1	2	7	69.7	14.409	P3	Underweight	Abnormal	2	14	Normal	Normal	2	44	14	0.7	2	1	Low	1	0.166667	2
Umuahia South	1	38	3	2	18	2	3	Trader	Self Employed	3	48	2	2	2	14	103	13.1963	P5	Normal	Normal	1	15.6	Normal	Normal	2	47	14	0.7	2	5	High	3	0.833333	1
Umuahia South	1	35	2	2	6	1	2	Trader	Self Employed	3	36	2	2	2	14	82	20.8209	P999	Obese	Abnormal	2	13.7	Normal	Normal	2	46	15	0.75	2	4	Medium	2	0.666667	2
Umuahia South	1	39	3	2	9	1	2	Business	Self Employed	3	23	1	2	1	13	85	17.9931	P97	Obese	Abnormal	2	13.3	Normal	Normal	2	47	13	0.65	1	4	Medium	2	0.666667	2
Umuahia South	1	40	3	2	3	1	3	Farmer	Self Employed	3	15	1	2	2	7	68	15.1384	P50	Normal	Normal	1	15	Normal	Normal	2	45	16	0.8	2	4	Medium	2	0.666667	2
Umuahia South	1	58	3	2	30	2	1	Trader	Self Employed	3	18	1	1	2	9	78	14.7929	P15	Normal	Normal	1	13.5	Normal	Normal	2	47	18	0.9	2	3	Medium	2	0.5	2
Umuahia South	1	22	1	2	3	1	2	Trader	Self Employed	3	24	1	2	2	10	82	14.8721	P50	Normal	Normal	1	14.3	Normal	Normal	2	51	11	0.55	1	5	High	3	0.833333	1
Umuahia South	1	40	3	2	10	2	2	Trader	Self Employed	3	10	1	1	2	5.9	62	15.3486	P10	Normal	Normal	1	13.5	Normal	Normal	2	44	16	0.8	2	5	High	3	0.833333	1
Umuahia South	1	33	2	2	11	2	2	Trader	Self Employed	3	22	1	2	2	8	74	14.6092	P50	Normal	Normal	1	13	Normal	Normal	2	44	15	0.75	2	4	Medium	2	0.666667	2
Umuahia South	1	39	3	2	18	2	2	Trader	Self Employed	3	12	1	1	2	8.73	78	14.3491	P3	Underweight	Abnormal	2	14.5	Normal	Normal	2	45	17	0.85	2	6	High	3	1	1
Umuahia South	1	38	3	2	24	2	2	Business	Self Employed	3	34	2	2	2	12	92	14.1777	P15	Normal	Normal	1	15.5	Normal	Normal	2	49	16	0.8	2	3	Medium	2	0.5	2
Umuahia South	1	29	2	2	18	2	2	Trader	Self Employed	3	25	2	1	2	13	91	15.6986	P50	Normal	Normal	1	15.3	Normal	Normal	2	49	16	0.8	2	4	Medium	2	0.666667	2
Umuahia South	1	34	2	2	10	2	2	Trader	Self Employed	3	53	2	1	2	18	104	16.642	P85	Overweight	Abnormal	2	16.8	Normal	Normal	2	51	18	0.9	2	3	Medium	2	0.5	2
Umuahia South	1	49	3	2	19	2	2	Hair Stylist	Self Employed	3	35	2	2	2	14	91	16.9062	P90	Overweight	Abnormal	2	17	Normal	Normal	2	49	15	0.75	2	4	Medium	2	0.666667	2
Umuahia South	1	31	2	2	6	1	3	Business	Self Employed	3	19	1	1	2	10	76	17.313	P85	Overweight	Abnormal	2	14	Normal	Normal	2	47	18	0.9	2	3	Medium	2	0.5	2
Umuahia South	1	36	3	2	6	1	2	Business	Self Employed	3	48	2	2	2	19	100	19	P99	Obese	Abnormal	2	15	Normal	Normal	2	49	15	0.75	2	2	Low	1	0.333333	2
Umuahia South	1	36	3	2	6	1	2	Business	Self Employed	3	30	2	1	2	19	91	22.9441	P999	Obese	Abnormal	2	14	Normal	Normal	2	46	18	0.9	2	3	Medium	2	0.5	2
Umuahia South	1	28	2	2	2	1	2	Business	Self Employed	3	13	1	1	2	9	73	16.8887	P75	Normal	Normal	1	14	Normal	Normal	2	47	17	0.85	2	4	Medium	2	0.666667	2
Umuahia South	1	27	2	2	10	2	2	Business	Self Employed	3	28	2	2	2	12	87	15.8541	P75	Normal	Normal	1	14	Normal	Normal	2	48	16	0.8	2	4	Medium	2	0.666667	2
Umuahia South	1	28	2	2	6	1	1	Hair Stylist	Self Employed	3	18	1	1	2	10	74	18.2615	P95	Obese	Abnormal	2	13	Normal	Normal	2	48	18	0.9	2	4	Medium	2	0.666667	2
Umuahia South	1	30	2	2	3	1	2	Business	Self Employed	3	20	1	1	2	14	76	24.2382	P999	Obese	Abnormal	2	15	Normal	Normal	2	47	13	0.65	1	3	Medium	2	0.5	2
Umuahia South	1	38	3	2	5	1	2	Business	Self Employed	3	28	2	1	2	10	74	18.2615	P97	Obese	Abnormal	2	15	Normal	Normal	2	49	17	0.85	2	3	Medium	2	0.5	2
Umuahia South	1	25	2	2	4	1	2	Student	Unemployed	1	19	1	2	2	9	76	15.5817	P50	Normal	Normal	1	12.5	MAM	GAM	1	44	10	0.5	1	2	Low	1	0.333333	2
Umuahia South	1	35	2	2	11	2	1	Farmer	Self Employed	3	58	2	2	2	8	75	14.2222	P25	Normal	Normal	1	11.4	SAM	GAM	1	46	8	0.4	1	3	Medium	2	0.5	2
Umuahia South	1	30	2	2	2	1	2	Health worker	Employed	2	48	2	1	2	15	90	18.5185	P99	Obese	Abnormal	2	15	Normal	Normal	2	49	14	0.7	2	3	Medium	2	0.5	2
Umuahia South	1	30	2	2	2	1	3	Teacher	Employed	2	13	1	1	2	11	78	18.0802	P85	Overweight	Abnormal	2	14	Normal	Normal	2	47	17	0.85	2	1	Low	1	0.166667	2
Umuahia South	1	39	3	2	5	1	2	Trader	Self Employed	3	8	1	2	2	8	62	20.8117	P999	Obese	Abnormal	2	13	Normal	Normal	2	39	18	0.9	2	1	Low	1	0.166667	2
Umuahia South	1	45	3	2	5	1	1	Fashion Designer	Self Employed	3	50	2	2	2	19	104	17.5666	P95	Obese	Abnormal	2	15	Normal	Normal	2	49	18	0.9	2	3	Medium	2	0.5	2
Umuahia South	1	47	3	2	5	1	1	Fashion Designer	Self Employed	3	38	2	2	2	15	90	18.5185	P99	Obese	Abnormal	2	15	Normal	Normal	2	46	18	0.9	2	3	Medium	2	0.5	2
Umuahia South	1	26	2	2	5	1	2	Business	Self Employed	3	58	2	2	1	15	102	14.4175	P50	Normal	Normal	1	14	Normal	Normal	2	49	16	0.8	2	2	Low	1	0.333333	2
Umuahia South	1	35	2	2	18	2	2	Business	Self Employed	3	58	2	2	2	20	108	17.1468	P90	Overweight	Abnormal	2	16	Normal	Normal	2	50	15	0.75	2	5	High	3	0.833333	1
Umuahia South	1	37	3	2	18	2	1	Business	Self Employed	3	42	2	1	1	21	95	23.2687	P999	Obese	Abnormal	2	16.5	Normal	Normal	2	53	14	0.7	2	5	High	3	0.833333	1
Umuahia South	1	28	2	2	7	1	2	Unemployed	Unemployed	1	26	2	2	2	12	82	17.8465	P95	Obese	Abnormal	2	13.8	Normal	Normal	2	47	16	0.8	2	4	Medium	2	0.666667	2
Umuahia South	1	27	2	2	2	1	3	Unemployed	Unemployed	1	19	1	1	2	13	80	20.3125	P999	Obese	Abnormal	2	13.5	Normal	Normal	2	49	11	0.55	1	5	High	3	0.833333	1
Umuahia South	1	32	2	2	5	1	2	Unemployed	Unemployed	1	36	2	1	2	13	90	16.0494	P75	Normal	Normal	1	13.8	Normal	Normal	2	49	10	0.5	1	4	Medium	2	0.666667	2
Umuahia South	1	32	2	2	7	1	2	Business	Self Employed	3	30	2	2	2	16	95	17.7285	P95	Obese	Abnormal	2	14.8	Normal	Normal	2	48	15	0.75	2	5	High	3	0.833333	1
Umuahia South	1	37	3	2	18	2	2	Business	Self Employed	3	36	2	1	2	10.4	93	12.0245	P01	Underweight	Abnormal	2	15	Normal	Normal	2	50	16	0.8	2	5	High	3	0.833333	1
Umuahia South	1	36	3	2	12	2	3	Business	Self Employed	3	25	2	2	2	13	86	17.5771	P95	Obese	Abnormal	2	14.5	Normal	Normal	2	46	13	0.65	1	5	High	3	0.833333	1
Umuahia South	1	29	2	2	10	2	2	Business	Self Employed	3	30	2	1	2	14	87	18.4965	P99	Obese	Abnormal	2	16	Normal	Normal	2	50	13	0.65	1	5	High	3	0.833333	1
Umuahia South	1	45	3	1	NA	#NULL!	3	Civil servant	Employed	2	48	2	1	2	18	100	18	P97	Obese	Abnormal	2	16.5	Normal	Normal	2	49	16	0.8	2	2	Low	1	0.333333	2
Umuahia South	1	30	2	2	4	1	2	Civil servant	Employed	2	28	2	2	2	17	87	22.46	P999	Obese	Abnormal	2	15	Normal	Normal	2	46	16	0.8	2	4	Medium	2	0.666667	2
Umuahia South	1	32	2	2	10	2	2	Unemployed	Unemployed	1	48	2	1	2	11	83	15.9675	P75	Normal	Normal	1	13.5	Normal	Normal	2	48	14	0.7	2	5	High	3	0.833333	1
Umuahia South	1	26	2	2	6	1	2	Unemployed	Unemployed	1	48	2	1	2	17	93	19.6555	P999	Obese	Abnormal	2	16	Normal	Normal	2	50	16	0.8	2	5	High	3	0.833333	1
Umuahia South	1	25	2	2	5	1	2	Business	Self Employed	3	36	2	1	2	15	95	16.6205	P85	Overweight	Abnormal	2	16	Normal	Normal	2	52	16	0.8	2	5	High	3	0.833333	1
Umuahia South	1	36	3	2	9	1	2	Business	Self Employed	3	48	2	2	2	14	93	16.1868	P75	Normal	Normal	1	13.5	Normal	Normal	2	50	15	0.75	2	5	High	3	0.833333	1
Umuahia South	1	42	3	2	11	2	2	Hair Stylist	Self Employed	3	48	2	2	2	18	107	15.7219	P75	Normal	Normal	1	17	Normal	Normal	2	47	15	0.75	2	4	Medium	2	0.666667	2
Umuahia South	1	27	2	1	1	1	2	Business	Self Employed	3	13	1	2	2	9	73	16.8887	P75	Normal	Normal	1	14	Normal	Normal	2	45	12	0.6	1	6	High	3	1	1
Umuahia South	1	28	2	2	10	2	2	Business	Self Employed	3	14	1	1	2	7.1	67	15.8164	P50	Normal	Normal	1	16	Normal	Normal	2	43	15	0.75	2	3	Medium	2	0.5	2
Umuahia South	1	35	2	2	18	2	1	Mill	Self Employed	3	16	1	1	1	3.18	73	5.96735	P01	Underweight	Abnormal	2	10	SAM	GAM	1	46	11	0.55	1	1	Low	1	0.166667	2
Umuahia South	1	15	1	1	NA	#NULL!	2	Student	Unemployed	1	15	1	1	2	9	70	18.3673	P95	Obese	Abnormal	2	14.2	Normal	Normal	2	42	9	0.45	1	2	Low	1	0.333333	2
Umuahia South	1	17	1	1	NA	#NULL!	2	Decorator	Self Employed	3	30	2	1	2	14	85	19.3772	P999	Obese	Abnormal	2	16.5	Normal	Normal	2	47	9	0.45	1	3	Medium	2	0.5	2
Umuahia South	1	25	2	2	6	1	2	Decorator	Self Employed	3	41	2	2	2	13	91	15.6986	P75	Normal	Normal	1	15	Normal	Normal	2	49	12	0.6	1	2	Low	1	0.333333	2
Umuahia South	1	26	2	2	2	1	2	Fashion Designer	Self Employed	3	14	1	2	2	8	68	17.301	P85	Overweight	Abnormal	2	11.5	MAM	GAM	1	45	12	0.6	1	5	High	3	0.833333	1
Umuahia South	1	30	2	2	2	1	2	Business	Self Employed	3	21	1	2	2	10	78	16.4366	P75	Normal	Normal	1	12	MAM	GAM	1	45	16	0.8	2	3	Medium	2	0.5	2
Umuahia South	1	32	2	2	5	1	2	Business	Self Employed	3	29	2	2	2	10	79	16.0231	P75	Normal	Normal	1	0.13	SAM	GAM	1	46	17	0.85	2	4	Medium	2	0.666667	2
Umuahia South	1	29	2	2	11	2	2	Nurse	Employed	2	35	2	1	2	14	89	17.6745	P95	Obese	Abnormal	2	18	Normal	Normal	2	50	10	0.5	1	3	Medium	2	0.5	2
Umuahia South	1	38	3	2	22	2	2	Farmer	Self Employed	3	58	2	1	2	20	108	17.1468	P95	Obese	Abnormal	2	17	Normal	Normal	2	54	14	0.7	2	4	Medium	2	0.666667	2
Umuahia South	1	70	3	2	40	2	1	Farmer	Self Employed	3	52	2	2	2	18	100	18	P97	Obese	Abnormal	2	18	Normal	Normal	2	45	11	0.55	1	4	Medium	2	0.666667	2
Umuahia South	1	24	1	2	2	1	3	Business	Self Employed	3	7	1	1	2	6.4	59	18.3855	P85	Overweight	Abnormal	2	12	MAM	GAM	1	39	18	0.9	2	1	Low	1	0.166667	2
Umuahia South	1	42	3	2	4	1	1	Trader	Self Employed	3	18	1	1	2	9.11	86	12.3175	P01	Underweight	Abnormal	2	14	Normal	Normal	2	46	8	0.4	1	4	Medium	2	0.666667	2
Umuahia South	1	36	3	2	17	2	2	Student	Unemployed	1	50	2	1	2	17	101	16.665	P85	Overweight	Abnormal	2	17	Normal	Normal	2	51	10	0.5	1	3	Medium	2	0.5	2
Umuahia South	1	17	1	1	NA	#NULL!	2	Student	Unemployed	1	26	2	2	2	11	87	14.533	P25	Normal	Normal	1	17	Normal	Normal	2	48	10	0.5	1	3	Medium	2	0.5	2
Umuahia South	1	24	1	1	NA	#NULL!	3	Student	Unemployed	1	50	2	1	2	17	82	25.2826	P999	Obese	Abnormal	2	17	Normal	Normal	2	51	4	0.2	1	4	Medium	2	0.666667	2
Umuahia South	1	15	1	1	NA	#NULL!	2	Trader	Self Employed	3	52	2	1	2	10	82	14.8721	P50	Normal	Normal	1	15	Normal	Normal	2	45	7	0.35	1	3	Medium	2	0.5	2
Umuahia South	1	29	2	2	6	1	2	Farmer	Self Employed	3	35	2	2	2	12	94	13.5808	P10	Normal	Normal	1	14	Normal	Normal	2	18.6	12	0.6	1	5	High	3	0.833333	1
Umuahia South	1	28	2	2	5	1	2	Teacher	Employed	2	48	2	2	1	13	98	13.536	P10	Normal	Normal	1	14.5	Normal	Normal	2	45	15	0.75	2	5	High	3	0.833333	1
Umuahia South	1	28	2	2	5	1	3	Teacher	Employed	2	15	1	1	1	12	79	19.2277	P99	Obese	Abnormal	2	17.5	Normal	Normal	2	48	11	0.55	1	4	Medium	2	0.666667	2
Umuahia South	1	29	2	2	7	1	2	Farmer	Self Employed	3	32	2	2	1	12	89	15.1496	P50	Normal	Normal	1	16.5	Normal	Normal	2	45	12	0.6	1	4	Medium	2	0.666667	2
Umuahia South	1	29	2	2	11	2	2	Trader	Self Employed	3	9	1	1	1	7	60	19.4444	P95	Obese	Abnormal	2	16	Normal	Normal	2	44	12	0.6	1	3	Medium	2	0.5	2
Umuahia South	1	30	2	2	11	2	2	Hair Stylist	Self Employed	3	28	2	2	1	9	74	16.4354	P75	Normal	Normal	1	17	Normal	Normal	2	46	15	0.75	2	4	Medium	2	0.666667	2
Umuahia South	1	33	2	2	5	1	3	Trader	Self Employed	3	16	1	2	2	7.72	73	14.4868	P15	Normal	Normal	1	15	Normal	Normal	2	40	15	0.75	2	6	High	3	1	1
Umuahia South	1	33	2	2	15	2	2	Teacher	Employed	2	30	2	1	1	18	96	19.5312	P999	Obese	Abnormal	2	19	Normal	Normal	2	50	17	0.85	2	4	Medium	2	0.666667	2
Umuahia South	1	26	2	2	4	1	2	Business	Self Employed	3	56	2	1	2	15	105	13.6054	P10	Normal	Normal	1	16	Normal	Normal	2	50	14	0.7	2	5	High	3	0.833333	1
Umuahia South	1	25	2	2	5	1	2	Hair Stylist	Self Employed	3	10	1	2	1	4.77	69	10.0189	P01	Underweight	Abnormal	2	14	Normal	Normal	2	42	18	0.9	2	4	Medium	2	0.666667	2
Umuahia South	1	39	3	2	10	2	2	Farmer	Self Employed	3	58	2	2	1	17	97	18.0678	P97	Obese	Abnormal	2	17	Normal	Normal	2	51	14	0.7	2	2	Low	1	0.333333	2
Umuahia South	1	19	1	2	2	1	2	Farmer	Self Employed	3	15	1	1	1	8	63	20.1562	P999	Obese	Abnormal	2	11.5	MAM	GAM	1	48	15	0.75	2	2	Low	1	0.333333	2
Umuahia South	1	38	3	2	8	1	2	Business	Self Employed	3	17	1	1	2	10	73	18.7652	P97	Obese	Abnormal	2	13.5	Normal	Normal	2	46	16	0.8	2	3	Medium	2	0.5	2
Umuahia South	1	36	3	2	5	1	3	Business	Self Employed	3	25	2	1	2	10	78	16.4366	P75	Normal	Normal	1	14.5	Normal	Normal	2	47	14	0.7	2	3	Medium	2	0.5	2
Umuahia South	1	31	2	2	22	2	2	Artisan	Self Employed	3	58	2	1	2	10.5	100	10.5	P01	Underweight	Abnormal	2	13.7	Normal	Normal	2	52	16	0.8	2	4	Medium	2	0.666667	2
Umuahia South	1	36	3	2	7	1	2	Business	Self Employed	3	24	1	2	2	9	79	14.4208	P25	Normal	Normal	1	14	Normal	Normal	2	46	14	0.7	2	4	Medium	2	0.666667	2
Umuahia South	1	35	2	2	8	1	2	Fashion Designer	Self Employed	3	9	1	1	2	7.3	64	17.8223	P75	Normal	Normal	1	13	Normal	Normal	2	46	17	0.85	2	4	Medium	2	0.666667	2
Umuahia South	1	58	3	2	30	2	1	Teacher	Employed	2	42	2	1	1	13	90	16.0494	P75	Normal	Normal	1	16	Normal	Normal	2	48	14	0.7	2	3	Medium	2	0.5	2
Umuahia South	1	23	1	2	4	1	2	Trader	Self Employed	3	26	2	1	1	10	77	16.8663	P85	Overweight	Abnormal	2	15	Normal	Normal	2	49	13	0.65	1	4	Medium	2	0.666667	2
Umuahia South	1	58	3	2	30	2	1	Farmer	Self Employed	3	48	2	1	1	14	97	14.8794	P50	Normal	Normal	1	15.5	Normal	Normal	2	51	16	0.8	2	3	Medium	2	0.5	2
Umuahia South	1	28	2	2	4	1	2	Magistrate	Employed	2	20	1	2	2	13	78	21.3675	P999	Obese	Abnormal	2	16	Normal	Normal	2	49	17	0.85	2	2	Low	1	0.333333	2
Umuahia South	1	40	3	2	14	2	2	Hair Stylist	Self Employed	3	15	1	1	1	9	77	15.1796	P15	Normal	Normal	1	14.5	Normal	Normal	2	45	15	0.75	2	4	Medium	2	0.666667	2
Umuahia South	1	43	3	2	9	1	2	Trader	Self Employed	3	28	2	2	2	10.3	76	17.8324	P95	Obese	Abnormal	2	13.6	Normal	Normal	2	51	17	0.85	2	3	Medium	2	0.5	2
Umuahia South	1	23	1	2	3	1	2	Teacher	Employed	2	28	2	1	2	10.3	98	10.7247	P01	Underweight	Abnormal	2	17	Normal	Normal	2	49	16	0.8	2	3	Medium	2	0.5	2
Umuahia South	1	36	3	2	6	1	3	Teacher	Employed	2	17	1	1	2	10	72	19.2901	P99	Obese	Abnormal	2	14	Normal	Normal	2	46	14	0.7	2	4	Medium	2	0.666667	2
Umuahia South	1	30	2	2	11	2	2	Farmer	Self Employed	3	48	2	2	2	10.4	93	12.0245	P1	Underweight	Abnormal	2	15	Normal	Normal	2	48	15	0.75	2	4	Medium	2	0.666667	2
Umuahia South	1	23	1	2	5	1	2	Fashion Designer	Self Employed	3	13	1	1	1	8	71	15.8699	P50	Normal	Normal	1	13.5	Normal	Normal	2	44	16	0.8	2	4	Medium	2	0.666667	2
Umuahia South	1	35	2	2	2	1	2	Trader	Self Employed	3	15	1	2	2	10	82.5	14.6924	P25	Normal	Normal	1	15	Normal	Normal	2	47	13	0.65	1	6	High	3	1	1
Umuahia South	1	24	1	2	5	1	2	Trader	Self Employed	3	36	2	2	2	14	93	16.1868	P75	Normal	Normal	1	16.5	Normal	Normal	2	50	15	0.75	2	6	High	3	1	1
Umuahia South	1	54	3	2	23	2	1	Trader	Self Employed	3	28	2	2	2	12	82	17.8465	P95	Obese	Abnormal	2	16.5	Normal	Normal	2	50	12	0.6	1	6	High	3	1	1
Umuahia South	1	23	1	2	3	1	2	Trader	Self Employed	3	33	2	1	2	11	84	15.5896	P50	Normal	Normal	1	13.5	Normal	Normal	2	49	15	0.75	2	4	Medium	2	0.666667	2
Umuahia South	1	24	1	2	7	1	1	Hair Stylist	Self Employed	3	12	1	1	2	7.21	70	14.7143	P5	Normal	Normal	1	13	Normal	Normal	2	45	17	0.85	2	6	High	3	1	1
Umuahia South	1	30	2	2	5	1	3	Farmer	Self Employed	3	29	2	1	2	14	85	19.3772	P999	Obese	Abnormal	2	15.3	Normal	Normal	2	52	17	0.85	2	3	Medium	2	0.5	2
Umuahia South	1	29	2	2	11	2	1	Farmer	Self Employed	3	41	2	2	1	15	95	16.6205	P85	Overweight	Abnormal	2	16.5	Normal	Normal	2	49	15	0.75	2	4	Medium	2	0.666667	2
Umuahia South	1	45	3	2	4	1	2	Housewife	Unemployed	1	18	1	1	1	11	75	19.5556	P99	Obese	Abnormal	2	16.5	Normal	Normal	2	47	14	0.7	2	2	Low	1	0.333333	2
Umuahia South	1	39	3	2	12	2	2	Farmer	Self Employed	3	58	2	1	2	17	100	17	P90	Overweight	Abnormal	2	16	Normal	Normal	2	50	15	0.75	2	2	Low	1	0.333333	2
Umuahia South	1	35	2	2	4	1	2	Food producer	Self Employed	3	20	1	2	2	10	78	16.4366	P75	Normal	Normal	1	14	Normal	Normal	2	46	19	0.95	2	2	Low	1	0.333333	2
Umuahia South	1	39	3	2	5	1	1	Food producer	Self Employed	3	29	2	2	2	12	89	15.1496	P50	Normal	Normal	1	15	Normal	Normal	2	59	20	1	2	2	Low	1	0.333333	2
Umuahia South	1	25	2	2	8	1	2	Unemployed	Unemployed	1	48	2	2	1	20	108	17.1468	P90	Overweight	Abnormal	2	16	Normal	Normal	2	50	12	0.6	1	5	High	3	0.833333	1
Umuahia South	1	45	3	2	15	2	1	Unemployed	Unemployed	1	48	2	2	1	10.9	99	11.1213	P01	Underweight	Abnormal	2	14.5	Normal	Normal	2	50	12	0.6	1	3	Medium	2	0.5	2
Umuahia South	1	22	1	2	2	1	2	Unemployed	Unemployed	1	18	1	1	2	7	60	19.4444	P99	Obese	Abnormal	2	13	Normal	Normal	2	46	13	0.65	1	4	Medium	2	0.666667	2
Umuahia South	1	40	3	2	13	2	2	Farmer	Self Employed	3	18	1	2	2	10.1	74	18.4441	P97	Obese	Abnormal	2	13.5	Normal	Normal	2	48	12	0.6	1	3	Medium	2	0.5	2
Umuahia South	1	40	3	2	4	1	1	Trader	Self Employed	3	30	2	2	2	14	70	28.5714	P999	Obese	Abnormal	2	14	Normal	Normal	2	49	17	0.85	2	2	Low	1	0.333333	2
Umuahia South	1	26	2	2	3	1	2	Hair Stylist	Self Employed	3	27	2	2	1	12	79	19.2277	P999	Obese	Abnormal	2	15	Normal	Normal	2	48	10	0.5	1	6	High	3	1	1
Umuahia South	1	30	2	2	5	1	2	Trader	Self Employed	3	36	2	2	2	16	93	18.4992	P99	Obese	Abnormal	2	15.5	Normal	Normal	2	51	13	0.65	1	6	High	3	1	1
Umuahia South	1	45	3	2	5	1	2	Trader	Self Employed	3	36	2	2	2	14	87	18.4965	P99	Obese	Abnormal	2	13.5	Normal	Normal	2	48	13	0.65	1	6	High	3	1	1
Umuahia South	1	30	2	2	5	1	2	Trader	Self Employed	3	44	2	1	2	16	99	16.3249	P85	Overweight	Abnormal	2	16	Normal	Normal	2	48	14	0.7	2	6	High	3	1	1
Umuahia South	1	28	2	2	4	1	2	Trader	Self Employed	3	48	2	2	2	15	106	13.3499	P10	Normal	Normal	1	15	Normal	Normal	2	51	14	0.7	2	6	High	3	1	1
Umuahia South	1	37	3	2	7	1	2	Trader	Self Employed	3	36	2	2	2	14	97	14.8794	P50	Normal	Normal	1	14	Normal	Normal	2	47	13	0.65	1	6	High	3	1	1
Umuahia South	1	29	2	2	4	1	2	Teacher	Employed	2	30	2	1	2	13	90	16.0494	P75	Normal	Normal	1	13	Normal	Normal	2	45	13	0.65	1	6	High	3	1	1
Umuahia South	1	38	3	2	9	1	2	Oil milling	Self Employed	3	30	2	1	2	15	87	19.8177	P999	Obese	Abnormal	2	14	Normal	Normal	2	49	15	0.75	2	4	Medium	2	0.666667	2
Umuahia South	1	29	2	2	10	2	2	Hospital cleaner	Employed	2	48	2	2	2	11	94	12.4491	P1	Underweight	Abnormal	2	13.5	Normal	Normal	2	48	13	0.65	1	6	High	3	1	1
Umuahia South	1	31	2	2	6	1	2	Hospital cleaner	Employed	2	48	2	2	2	17	101	16.665	P85	Overweight	Abnormal	2	15.5	Normal	Normal	2	51	12	0.6	1	6	High	3	1	1
Umuahia South	1	30	2	2	3	1	2	Trader	Self Employed	3	28	2	1	2	8	69	16.8032	P85	Overweight	Abnormal	2	12.5	MAM	GAM	1	46	13	0.65	1	2	Low	1	0.333333	2
Umuahia South	1	42	3	2	10	2	1	Trader	Self Employed	3	30	2	2	2	12	87	15.8541	P75	Normal	Normal	1	13.3	Normal	Normal	2	46	15	0.75	2	6	High	3	1	1
Umuahia South	1	28	2	2	7	1	2	Trader	Self Employed	3	48	2	2	2	16	102	15.3787	P75	Normal	Normal	1	16	Normal	Normal	2	50	14	0.7	2	6	High	3	1	1
Umuahia South	1	35	2	2	9	1	2	Trader	Self Employed	3	26	2	2	1	10	81	15.2416	P50	Normal	Normal	1	14.2	Normal	Normal	2	45	8	0.4	1	5	High	3	0.833333	1
Umuahia South	1	44	3	2	19	2	2	Trader	Self Employed	3	50	2	1	2	14	92	16.5406	P85	Overweight	Abnormal	2	15.5	Normal	Normal	2	52	10	0.5	1	4	Medium	2	0.666667	2
Umuahia South	1	35	2	2	4	1	2	Trader	Self Employed	3	8	1	2	2	6.8	64	16.6016	P50	Normal	Normal	1	13	Normal	Normal	2	46	10	0.5	1	6	High	3	1	1
Umuahia South	1	27	2	2	2	1	3	Fashion Designer	Self Employed	3	18	1	1	2	10	77	16.8663	P75	Normal	Normal	1	16	Normal	Normal	2	46	16	0.8	2	6	High	3	1	1
Umuahia South	1	25	2	2	2	1	2	Fashion Designer	Self Employed	3	14	1	2	2	7	71	13.8861	P5	Normal	Normal	1	13	Normal	Normal	2	43	15	0.75	2	6	High	3	1	1
Umuahia South	1	30	2	2	14	2	2	Farmer	Self Employed	3	24	1	1	2	11	75	19.5556	P999	Obese	Abnormal	2	14	Normal	Normal	2	48	15	0.75	2	4	Medium	2	0.666667	2
Umuahia South	1	35	2	2	23	2	2	Trader	Self Employed	3	36	2	2	1	14	88	18.0785	P97	Obese	Abnormal	2	14.5	Normal	Normal	2	47	16	0.8	2	4	Medium	2	0.666667	2
Umuahia South	1	35	2	2	10	2	2	Trader	Self Employed	3	18	1	1	2	9	76	15.5817	P50	Normal	Normal	1	14.5	Normal	Normal	2	46	18	0.9	2	5	High	3	0.833333	1
Umuahia South	1	38	3	1	11	2	2	Farmer	Self Employed	3	24	1	2	1	10	86	13.5208	P5	Normal	Normal	1	14	Normal	Normal	2	49	15	0.75	2	4	Medium	2	0.666667	2
Umuahia South	1	53	3	2	34	2	1	Business	Self Employed	3	7	1	2	1	7	43	37.8583	P999	Obese	Abnormal	2	13.5	Normal	Normal	2	43	16	0.8	2	5	High	3	0.833333	1
Umuahia South	1	38	3	2	15	2	2	Farmer	Self Employed	3	48	2	2	1	16	107	13.975	P25	Normal	Normal	1	16.5	Normal	Normal	2	49	17	0.85	2	5	High	3	0.833333	1
Umuahia South	1	28	2	2	4	1	2	Trader	Self Employed	3	9	1	2	1	7.2	68	15.5709	P25	Normal	Normal	1	14	Normal	Normal	2	44	17	0.85	2	4	Medium	2	0.666667	2
Umuahia South	1	34	2	2	9	1	2	Trader	Self Employed	3	15	1	2	1	8	74	14.6092	P25	Normal	Normal	1	12.5	MAM	GAM	1	44	10	0.5	1	5	High	3	0.833333	1
Umuahia South	1	25	2	2	9	1	2	Business	Self Employed	3	18	1	2	1	8	60	22.2222	P999	Obese	Abnormal	2	14	Normal	Normal	2	46	18	0.9	2	4	Medium	2	0.666667	2
Umuahia South	1	70	3	2	14	2	2	Fashion Designer	Self Employed	3	36	2	2	2	15	101	14.7044	P50	Normal	Normal	1	16	Normal	Normal	2	52	17	0.85	2	4	Medium	2	0.666667	2
Umuahia South	1	34	2	2	7	1	3	Trader	Self Employed	3	6	1	2	1	7.2	65	17.0414	P75	Normal	Normal	1	14	Normal	Normal	2	44	16	0.8	2	4	Medium	2	0.666667	2
Umuahia South	1	36	3	2	15	2	2	Trader	Self Employed	3	58	2	2	1	20.3	120	14.0972	P25	Normal	Normal	1	17	Normal	Normal	2	54	11	0.55	1	#NULL!		#NULL!	0	#NULL!
Umuahia South	1	35	2	2	8	1	2	Trader	Self Employed	3	72	2	2	2	20.2	116	15.0119	P999	Obese	Abnormal	2	16.8	Normal	Normal	2	51	13	0.65	1	#NULL!		#NULL!	0	#NULL!
Umuahia South	1	33	2	2	8	1	2	Trader	Self Employed	3	42	2	2	2	12	95	13.2964	P5	Normal	Normal	1	13.5	Normal	Normal	2	49	12	0.6	1	#NULL!		#NULL!	0	#NULL!
Umuahia South	1	22	1	2	3	1	2	Artisans	Self Employed	3	22	1	2	1	11	82	16.3593	P75	Normal	Normal	1	12.7	Normal	Normal	2	49	14	0.7	2	#NULL!		#NULL!	0	#NULL!
Umuahia South	1	60	3	2	43	2	2	Trader	Self Employed	3	55	2	2	2	15	103	14.1389	P25	Normal	Normal	1	15.9	Normal	Normal	2	48	12	0.6	1	#NULL!		#NULL!	0	#NULL!
Umuahia South	1	32	2	2	6	1	3	Event Service Providers	Self Employed	3	31	2	1	2	15	91	18.1138	P97	Obese	Abnormal	2	15	Normal	Normal	2	51	15	0.75	2	#NULL!		#NULL!	0	#NULL!
Umuahia South	1	27	2	2	7	1	2	Trader	Self Employed	3	4	1	1	1	12	96	13.0208	P01	Underweight	Abnormal	2	14	Normal	Normal	2	48	14	0.7	2	#NULL!		#NULL!	0	#NULL!
Umuahia South	1	30	2	2	8	1	2	Trader	Self Employed	3	3	1	1	1	14	88	18.0785	P85	Overweight	Abnormal	2	14.1	Normal	Normal	2	49	15	0.75	2	#NULL!		#NULL!	0	#NULL!
Umuahia South	1	40	3	2	8	1	2	Trader	Self Employed	3	36	2	1	2	17	95	18.8366	P99	Obese	Abnormal	2	14	Normal	Normal	2	51	9	0.45	1	#NULL!		#NULL!	0	#NULL!
Umuahia South	1	37	3	2	7	1	2	Trader	Self Employed	3	41	2	1	2	10.5	86	14.1969	P15	Normal	Normal	1	14	Normal	Normal	2	44	13	0.65	1	#NULL!		#NULL!	0	#NULL!
Umuahia South	1	34	2	1		#NULL!	2	Trader	Self Employed	3	24	1	2	2	10.3	84.5	14.4253	P25	Normal	Normal	1	11.5	MAM	GAM	1	47.5	13	0.65	1	#NULL!		#NULL!	0	#NULL!
Umuahia South	1	29	2	2	4	1	2	Trader	Self Employed	3	38	2	2	2	15	91	18.1138	P97	Obese	Abnormal	2	16	Normal	Normal	2	51.5	15	0.75	2	#NULL!		#NULL!	0	#NULL!
Umuahia South	1	28	2	2	9	1	2	Trader	Self Employed	3	64	2	2	2	19	112	15.1467	P999	Obese	Abnormal	2	17.6	Normal	Normal	2	51.5	16	0.8	2	#NULL!		#NULL!	0	#NULL!
Umuahia South	1	27	2	2	3	1	2	Business	Self Employed	3	24	1	2	2	10	70	20.4082	P999	Obese	Abnormal	2	14	Normal	Normal	2	48	15	0.75	2	#NULL!		#NULL!	0	#NULL!
Umuahia South	1	32	2	2	9	1	2	Business	Self Employed	3	24	1	1	2	14	86	18.9292	P99	Obese	Abnormal	2	14	Normal	Normal	2	48	13	0.65	1	#NULL!		#NULL!	0	#NULL!
Umuahia South	1	27	2	2	3	1	2	Unemployed	Unemployed	1	24	1	1	2	15	91	18.1138	P95	Obese	Abnormal	2	16	Normal	Normal	2	52	14	0.7	2	#NULL!		#NULL!	0	#NULL!
Umuahia South	1	32	2	2	4	1	3	Business	Self Employed	3	24	1	1	2	15	82	22.3081	P999	Obese	Abnormal	2	14	Normal	Normal	2	48	15	0.75	2	#NULL!		#NULL!	0	#NULL!
Umuahia South	1	34	2	2	7	1	2	Artisans	Self Employed	3	48	2	2	2	19	109	15.9919	P75	Normal	Normal	1	15	Normal	Normal	2	51	14	0.7	2	#NULL!		#NULL!	0	#NULL!
Umuahia South	1	34	2	2	6	1	2	Trader	Self Employed	3	37	2	1	2	21	109	17.6753	P95	Obese	Abnormal	2	16	Normal	Normal	2	52	13	0.65	1	#NULL!		#NULL!	0	#NULL!
Umuahia South	1	35	2	2	23	2	2	Trader	Self Employed	3	35	2	2	2	13	88	16.7872	P85	Overweight	Abnormal	2	15	Normal	Normal	2	48.5	14	0.7	2	#NULL!		#NULL!	0	#NULL!
Umuahia South	1	25	2	2	7	1	1	Unemployed	Unemployed	1	29	2	2	2	14	89	17.6745	P95	Obese	Abnormal	2	16.5	Normal	Normal	2	47.5	14	0.7	2	#NULL!		#NULL!	0	#NULL!
Umuahia South	1	24	1	2	3	1	3	Worker	Employed	2	29	2	2	2	13	90	16.0494	P75	Normal	Normal	1	15	Normal	Normal	2	48	14	0.7	2	#NULL!		#NULL!	0	#NULL!
Umuahia South	1	34	2	2	11	2	2	Trader	Self Employed	3	59	2	2	2	15	106	13.3499	P10	Normal	Normal	1	14	Normal	Normal	2	50	16	0.8	2	#NULL!		#NULL!	0	#NULL!
Umuahia South	1	32	2	2	7	1	2	Business	Self Employed	3	36	2	1	2	14	109	11.7835	P01	Underweight	Abnormal	2	16.5	Normal	Normal	2	47	14	0.7	2	#NULL!		#NULL!	0	#NULL!
Umuahia South	1	50	3	2	9	1	3	Worker	Employed	2	39	2	2	2	13	95	14.4044	P25	Normal	Normal	1	15	Normal	Normal	2	51	14	0.7	2	#NULL!		#NULL!	0	#NULL!
Umuahia South	1	30	2	1		#NULL!	2	Artisans	Self Employed	3	48	2	2	2	13	85	17.9931	P97	Obese	Abnormal	2	15	Normal	Normal	2	51	13	0.65	1	#NULL!		#NULL!	0	#NULL!
Umuahia South	1	40	3	2	13	2	1	Business	Self Employed	3	59	2	1	2	16	100	16	P75	Normal	Normal	1	16	Normal	Normal	2	51	12	0.6	1	#NULL!		#NULL!	0	#NULL!
Umuahia South	1	29	2	2	7	1	2	Business	Self Employed	3	31	2	1	2	12	84	17.0068	P85	Overweight	Abnormal	2	14	Normal	Normal	2	49	13	0.65	1	#NULL!		#NULL!	0	#NULL!
Umuahia South	1	47	3	2	15	2	2	Business	Self Employed	3	48	2	1	2	18	102	17.301	P95	Obese	Abnormal	2	19	Normal	Normal	2	51	14	0.7	2	#NULL!		#NULL!	0	#NULL!
Umuahia South	1	28	2	2	6	1	2	Business	Self Employed	3	26	2	2	2	10	84	14.1723	P15	Normal	Normal	1	13	Normal	Normal	2	46	15	0.75	2	#NULL!		#NULL!	0	#NULL!
Umuahia South	1	37	3	2	8	1	2	Business	Self Employed	3	44	2	2	2	13	90	16.0494	P75	Normal	Normal	1	14	Normal	Normal	2	46	14	0.7	2	#NULL!		#NULL!	0	#NULL!
Umuahia South	1	38	3	2	16	2	2	Business	Self Employed	3	35	2	1	2	13	88	16.7872	P85	Overweight	Abnormal	2	15	Normal	Normal	2	50	14	0.7	2	#NULL!		#NULL!	0	#NULL!
Umuahia South	1	21	1	2	4	1	2	Business	Self Employed	3	38	2	1	2	16	95	17.7285	P95	Obese	Abnormal	2	15	Normal	Normal	2	49	14	0.7	2	#NULL!		#NULL!	0	#NULL!
Umuahia South	1	53	3	2	27	2	2	Farmer	Self Employed	3	23	1	2	2	10	77	16.8663	P85	Overweight	Abnormal	2	13	Normal	Normal	2	48	16	0.8	2	#NULL!		#NULL!	0	#NULL!
Umuahia South	1	46	3	2	29	2	2	Business	Self Employed	3	48	2	2	2	15	102	14.4175	P50	Normal	Normal	1	15	Normal	Normal	2	47	14	0.7	2	#NULL!		#NULL!	0	#NULL!
Umuahia South	1	36	3	2	5	1	2	Trader	Self Employed	3	36	2	1	2	16	80	25	P999	Obese	Abnormal	2	15	Normal	Normal	2	49	15	0.75	2	#NULL!		#NULL!	0	#NULL!
Umuahia South	1	27	2	2	5	1	2	Business	Self Employed	3	36	2	1	2	10	83	14.5159	P25	Normal	Normal	1	13	Normal	Normal	2	50	16	0.8	2	#NULL!		#NULL!	0	#NULL!
Umuahia South	1	43	3	2	14	2	2	Artisans	Self Employed	3	2	1	1	1	16	93	18.4992	P95	Obese	Abnormal	2	15.9	Normal	Normal	2	49	9	0.45	1	#NULL!		#NULL!	0	#NULL!
Umuahia South	1	29	2	2	3	1	3	Artisans	Self Employed	3	3	1	1	2	15	99	15.3046	P15	Normal	Normal	1	14.3	Normal	Normal	2	49	12	0.6	1	#NULL!		#NULL!	0	#NULL!
Umuahia South	1	35	2	2	5	1	2	Trader	Self Employed	3	4	1	2	1	14	101	13.7241	P3	Underweight	Abnormal	2	15	Normal	Normal	2	49	12	0.6	1	#NULL!		#NULL!	0	#NULL!
Umuahia South	1	30	2	2	6	1	2	Trader	Self Employed	3	5	1	1	2	19	111	15.4208	P10	Normal	Normal	1	15.3	Normal	Normal	2	48.5	9	0.45	1	#NULL!		#NULL!	0	#NULL!
Umuahia South	1	33	2	2	7	1	3	Trader	Self Employed	3	39	2	1	2	16	97	17.005	P90	Overweight	Abnormal	2	15.6	Normal	Normal	2	53	13	0.65	1	#NULL!		#NULL!	0	#NULL!
Umuahia South	1	28	2	2	5	1	2	Trader	Self Employed	3	60	2	2	2	20	120	13.8889	P25	Normal	Normal	1	17.8	Normal	Normal	2	52	13	0.65	1	#NULL!		#NULL!	0	#NULL!
Umuahia South	1	29	2	1		#NULL!	2	Event Service Providers	Self Employed	3	48	2	1	2	14	101	13.7241	P10	Normal	Normal	1	14.9	Normal	Normal	2	51	13	0.65	1	#NULL!		#NULL!	0	#NULL!
Umuahia South	1	32	2	2	12	2	1	Artisans	Self Employed	3	72	2	1	2	18	115	13.6106	P999	Obese	Abnormal	2	16	Normal	Normal	2	51	11	0.55	1	#NULL!		#NULL!	0	#NULL!
Umuahia South	1	52	3	2	26	2	1	Trader	Self Employed	3	45	2	2	2	11	98	11.4536	P01	Underweight	Abnormal	2	17	Normal	Normal	2	52	15	0.75	2	#NULL!		#NULL!	0	#NULL!
Umuahia South	1	29	2	2	9	1	2	Trader	Self Employed	3	27	2	2	2	10	84	14.1723	P15	Normal	Normal	1	13	Normal	Normal	2	48	13	0.65	1	#NULL!		#NULL!	0	#NULL!
Umuahia South	1	35	2	2	9	1	1	Trader	Self Employed	3	64	2	1	2	20	118	14.3637	P999	Obese	Abnormal	2	16.9	Normal	Normal	2	53	13	0.65	1	#NULL!		#NULL!	0	#NULL!
Umuahia South	1	40	3	2	20	2	2	Trader	Self Employed	3	62	2	1	2	21	120	14.5833	P999	Obese	Abnormal	2	17	Normal	Normal	2	57	13	0.65	1	#NULL!		#NULL!	0	#NULL!
Umuahia South	1	45	3	2	17	2	2	Self employed	Self Employed	3	49	2	2	2	17	107	14.8485	P50	Normal	Normal	1	15	Normal	Normal	2	48	12	0.6	1	#NULL!		#NULL!	0	#NULL!
Umuahia South	1	38	3	2	15	2	1	Business	Self Employed	3	59	2	1	2	20	110	16.5289	P85	Overweight	Abnormal	2	17	Normal	Normal	2	52	12	0.6	1	#NULL!		#NULL!	0	#NULL!
Umuahia South	1	33	2	2	17	2	1	Trader	Self Employed	3	48	2	2	2	19	106	16.9099	P90	Overweight	Abnormal	2	15	Normal	Normal	2	50	15	0.75	2	#NULL!		#NULL!	0	#NULL!
Umuahia South	1	36	3	2	12	2	2	Business	Self Employed	3	60	2	2	2	20	113	15.6629	P75	Normal	Normal	1	14.5	Normal	Normal	2	51	15	0.75	2	#NULL!		#NULL!	0	#NULL!
Umuahia South	1	49	3	2	15	2	1	Business	Self Employed	3	57	2	2	2	20	91	24.1517	P999	Obese	Abnormal	2	16	Normal	Normal	2	54	13	0.65	1	#NULL!		#NULL!	0	#NULL!
Umuahia South	1	40	3	2	15	2	2	Artisans	Self Employed	3	33	2	1	2	11	88	14.2045	P15	Normal	Normal	1	15	Normal	Normal	2	49	15	0.75	2	#NULL!		#NULL!	0	#NULL!
Umuahia South	1	38	3	2	11	2	2	Business	Self Employed	3	37	2	1	2	13	89	16.4121	P85	Overweight	Abnormal	2	14	Normal	Normal	2	48	15	0.75	2	#NULL!		#NULL!	0	#NULL!
Umuahia South	1	36	3	2	19	2	2	Artisans	Self Employed	3	48	2	2	2	20	109.5	16.6802	P85	Overweight	Abnormal	2	16.8	Normal	Normal	2	52.5	14	0.7	2	#NULL!		#NULL!	0	#NULL!
Umuahia South	1	34	2	2	6	1	2	Business	Self Employed	3	52	2	1	2	10.19	98.5	10.5027	P01	Underweight	Abnormal	2	14	Normal	Normal	2	49.5	15	0.75	2	#NULL!		#NULL!	0	#NULL!
Umuahia South	1	35	2	2	13	2	2	Artisans	Self Employed	3	24	1	2	2	12	83	17.4191	P90	Overweight	Abnormal	2	15	Normal	Normal	2	48	15	0.75	2	#NULL!		#NULL!	0	#NULL!
Umuahia South	1	38	3	2	19	2	1	Trader	Self Employed	3	35	2	1	2	10	89	12.6247	P1	Underweight	Abnormal	2	16	Normal	Normal	2	50	15	0.75	2	#NULL!		#NULL!	0	#NULL!
Umuahia South	1	32	2	2	5	1	2	Worker	Employed	2	48	2	2	2	11	100.5	10.8908	P01	Underweight	Abnormal	2	14.5	Normal	Normal	2	49.5	15	0.75	2	#NULL!		#NULL!	0	#NULL!
Umuahia South	1	28	2	2	7	1	2	Business	Self Employed	3	27	2	2	2	10.7	91	12.9211	P1	Underweight	Abnormal	2	14	Normal	Normal	2	50	16	0.8	2	#NULL!		#NULL!	0	#NULL!
Umuahia South	1	30	2	2	9	1	1	Business	Self Employed	3	19	1	1	2	10.3	53	36.6679	P999	Obese	Abnormal	2	12.5	MAM	GAM	1	45.5	15	0.75	2	#NULL!		#NULL!	0	#NULL!
Umuahia South	1	37	3	2	14	2	2	Business	Self Employed	3	17	1	2	2	10.4	76	18.0055	P95	Obese	Abnormal	2	15	Normal	Normal	2	46	16	0.8	2	#NULL!		#NULL!	0	#NULL!
Umuahia South	1	37	3	2	18	2	2	Trader	Self Employed	3	52	2	1	2	19	104	17.5666	P95	Obese	Abnormal	2	14.5	Normal	Normal	2	51.5	13	0.65	1	#NULL!		#NULL!	0	#NULL!
Umuahia South	1	39	3	2	16	2	2	Business	Self Employed	3	60	2	1	2	19	113	14.8798	P50	Normal	Normal	1	17	Normal	Normal	2	50.5	13	0.65	1	#NULL!		#NULL!	0	#NULL!
Umuahia South	1	36	3	2	8	1	2	Trader	Self Employed	3	53	2	2	2	15	101	14.7044	P50	Normal	Normal	1	16.5	Normal	Normal	2	46	10	0.5	1	#NULL!		#NULL!	0	#NULL!
Umuahia South	1	32	2	2	6	1	2	Worker	Employed	2	63	2	1	2	21	116	15.6064	P999	Obese	Abnormal	2	16	Normal	Normal	2	53	13	0.65	1	#NULL!		#NULL!	0	#NULL!
Umuahia South	1	32	2	2	6	1	2	Worker	Employed	2	45	2	2	2	14	110	11.5702	P01	Underweight	Abnormal	2	15	Normal	Normal	2	49	12	0.6	1	#NULL!		#NULL!	0	#NULL!
Umuahia South	1	42	3	2	9	1	2	Artisans	Self Employed	3	48	2	1	2	20	98	20.8247	P999	Obese	Abnormal	2	14.5	Normal	Normal	2	52.5	13	0.65	1	#NULL!		#NULL!	0	#NULL!
Umuahia South	1	46	3	2	6	1	2	Business	Self Employed	3	37	2	1	2	15	87	19.8177	P999	Obese	Abnormal	2	14	Normal	Normal	2	47	14	0.7	2	#NULL!		#NULL!	0	#NULL!
Umuahia South	1	36	3	1		#NULL!	2	Unemployed	Unemployed	1	35	2	1	2	15	81	22.8624	P999	Obese	Abnormal	2	14	Normal	Normal	2	49	16	0.8	2	#NULL!		#NULL!	0	#NULL!
Umuahia South	1	31	2	2	7	1	2	Artisans	Self Employed	3	29	2	1	2	17	84	24.093	P999	Obese	Abnormal	2	13	Normal	Normal	2	49	16	0.8	2	#NULL!		#NULL!	0	#NULL!
Umuahia South	1	28	2	2	6	1	2	Business	Self Employed	3	28	2	2	2	10	84	14.1723	P15	Normal	Normal	1	13	Normal	Normal	2	48	15	0.75	2	#NULL!		#NULL!	0	#NULL!
Umuahia South	1	25	2	2	6	1	2	Farmer	Self Employed	3	41	2	2	2	16	110	13.2231	P5	Normal	Normal	1	15	Normal	Normal	2	49	14	0.7	2	#NULL!		#NULL!	0	#NULL!
Umuahia South	1	29	2	2	12	2	2	Business	Self Employed	3	36	2	1	2	15	81	22.8624	P999	Obese	Abnormal	2	14	Normal	Normal	2	49	14	0.7	2	#NULL!		#NULL!	0	#NULL!
Umuahia South	1	30	2	2	6	1	2	Business	Self Employed	3	31	2	2	2	20	89	25.2493	P999	Obese	Abnormal	2	16	Normal	Normal	2	50.5	14	0.7	2	#NULL!		#NULL!	0	#NULL!
Umuahia South	1	35	2	2	10	2	2	Business	Self Employed	3	48	2	2	2	20.4	1115	0.164089	P01	Underweight	Abnormal	2	17	Normal	Normal	2	55	13	0.65	1	#NULL!		#NULL!	0	#NULL!
Umuahia South	1	36	3	2	9	1	2	Worker	Employed	2	4	1	2	2	19	114	14.6199	P10	Normal	Normal	1	15	Normal	Normal	2	48.5	12	0.6	1	#NULL!		#NULL!	0	#NULL!
Umuahia South	1	15	1	1		#NULL!	1	Unemployed	Unemployed	1	5	1	2	2	19	116	14.1201	P3	Underweight	Abnormal	2	16.2	Normal	Normal	2	48	9	0.45	1	#NULL!		#NULL!	0	#NULL!
Umuahia South	1	24	1	2	3	1	2	Trader	Self Employed	3	21	1	1	2	11	92	12.9962	P1	Underweight	Abnormal	2	15	Normal	Normal	2	49	14	0.7	2	#NULL!		#NULL!	0	#NULL!
Umuahia South	1	33	2	2	13	2	2	Trader	Self Employed	3	72	2	1	2	20	112	15.9439	P999	Obese	Abnormal	2	16	Normal	Normal	2	55	13	0.65	1	#NULL!		#NULL!	0	#NULL!
Umuahia South	1	38	3	2	10	2	2	Trader	Self Employed	3	59	2	1	2	18	112	14.3495	P25	Normal	Normal	1	16	Normal	Normal	2	48	11	0.55	1	#NULL!		#NULL!	0	#NULL!
Umuahia South	1	36	3	2	6	1	2	Business	Self Employed	3	36	2	1	2	20	102	19.2234	P999	Obese	Abnormal	2	17	Normal	Normal	2	50.5	14	0.7	2	#NULL!		#NULL!	0	#NULL!
Umuahia South	1	28	2	2	7	1	2	Trader	Self Employed	3	34	2	1	2	19	103	17.9093	P97	Obese	Abnormal	2	14.5	Normal	Normal	2	48	14	0.7	2	#NULL!		#NULL!	0	#NULL!
Umuahia South	1	60	3	2	30	2	1	Business	Self Employed	3	72	2	1	2	21	113	16.4461	P999	Obese	Abnormal	2	16.5	Normal	Normal	2	52	16	0.8	2	#NULL!		#NULL!	0	#NULL!
Umuahia South	1	45	3	2	6	1	3	Worker	Employed	2	50	2	2	2	17	103	16.0241	P75	Normal	Normal	1	15.5	Normal	Normal	2	52	15	0.75	2	#NULL!		#NULL!	0	#NULL!
Umuahia South	1	45	3	2	6	1	3	Worker	Employed	2	23	1	2	2	12	78	19.7239	P999	Obese	Abnormal	2	16	Normal	Normal	2	45	15	0.75	2	#NULL!		#NULL!	0	#NULL!
Umuahia South	1	40	3	2	6	1	1	Business	Self Employed	3	24	1	1	2	12	91	14.491	P10	Normal	Normal	1	14	Normal	Normal	2	48	14	0.7	2	#NULL!		#NULL!	0	#NULL!
Umuahia South	1	22	1	2	5	1	2	Trader	Self Employed	3	43	2	2	2	14	109	11.7835	P01	Underweight	Abnormal	2	15.5	Normal	Normal	2	47	13	0.65	1	#NULL!		#NULL!	0	#NULL!
Umuahia South	1	31	2	2	9	1	2	Business	Self Employed	3	48	2	1	2	20	98	20.8247	P999	Obese	Abnormal	2	17	Normal	Normal	2	52	14	0.7	2	#NULL!		#NULL!	0	#NULL!
Umuahia South	1	30	2	2	4	1	2	Trader	Self Employed	3	5	1	1	2	21	96	22.7865	P999	Obese	Abnormal	2	17	Normal	Normal	2	49	14	0.7	2	#NULL!		#NULL!	0	#NULL!
Umuahia South	1	15	1	1		#NULL!	1	Unemployed	Unemployed	1	4	1	1	2	17	102	16.3399	P50	Normal	Normal	1	17	Normal	Normal	2	48.5	12	0.6	1	#NULL!		#NULL!	0	#NULL!
Umuahia South	1	52	3	1		#NULL!	2	Worker	Employed	2	5	1	1	2	19.5	117	14.245	P1	Underweight	Abnormal	2	17.8	Normal	Normal	2	50	12	0.6	1	#NULL!		#NULL!	0	#NULL!
Umuahia South	1	30	2	2	14	2	2	Worker	Employed	2	6	1	2	2	19	101	18.6256	P90	Overweight	Abnormal	2	14.8	Normal	Normal	2	48	13	0.65	1	#NULL!		#NULL!	0	#NULL!
Umuahia South	1	54	3	2	35	2	2	Trader	Self Employed	3	3	1	1	2	12	91.5	14.3331	P3	Underweight	Abnormal	2	14.5	Normal	Normal	2	49.7	15	0.75	2	#NULL!		#NULL!	0	#NULL!
Umuahia South	1	40	3	2	5	1	3	Worker	Employed	2	3	1	2	2	11	89.5	13.7324	P5	Normal	Normal	1	15.5	Normal	Normal	2	48	10	0.5	1	#NULL!		#NULL!	0	#NULL!
Umuahia South	1	28	2	2	13	2	2	Trader	Self Employed	3	2	1	1	2	11	77	18.5529	P95	Obese	Abnormal	2	13.6	Normal	Normal	2	48	14	0.7	2	#NULL!		#NULL!	0	#NULL!
Umuahia South	1	44	3	2	15	2	2	Trader	Self Employed	3	6	1	2	2	21	112	16.7411	P50	Normal	Normal	1	18.6	Normal	Normal	2	45	16	0.8	2	#NULL!		#NULL!	0	#NULL!
Umuahia South	1	34	2	2	13	2	2	Trader	Self Employed	3	3	1	1	2	12	91	14.491	P5	Normal	Normal	1	14	Normal	Normal	2	47.5	13	0.65	1	#NULL!		#NULL!	0	#NULL!
Umuahia South	1	40	3	2	12	2	2	Trader	Self Employed	3	50	2	1	2	21	108	18.0041	P99	Obese	Abnormal	2	14	Normal	Normal	2	47	16	0.8	2	#NULL!		#NULL!	0	#NULL!
Umuahia South	1	23	1	1	6	1	2	Business	Self Employed	3	24	1	2	2	10	77	16.8663	P85	Overweight	Abnormal	2	15.5	Normal	Normal	2	46	13	0.65	1	#NULL!		#NULL!	0	#NULL!
Umuahia South	1	30	2	2	10	2	2	Business	Self Employed	3	72	2	1	2	21	100	21	P999	Obese	Abnormal	2	16.5	Normal	Normal	2	51	14	0.7	2	#NULL!		#NULL!	0	#NULL!
Umuahia South	1	35	2	2	7	1	3	Worker	Employed	2	65	2	2	2	19	113	14.8798	P999	Obese	Abnormal	2	18	Normal	Normal	2	48	16	0.8	2	#NULL!		#NULL!	0	#NULL!
Umuahia South	1	37	3	2	10	2	2	Trader	Self Employed	3	50	2	1	2	17	103	16.0241	P75	Normal	Normal	1	15.5	Normal	Normal	2	52	15	0.75	2	#NULL!		#NULL!	0	#NULL!
Umuahia South	1	25	2	2	3	1	3	Trader	Self Employed	3	3	1	1	2	14	92.5	16.3623	P50	Normal	Normal	1	14.4	Normal	Normal	2	49	14	0.7	2	#NULL!		#NULL!	0	#NULL!
Umuahia South	1	17	1	1		#NULL!	2	Unemployed	Unemployed	1	3	1	1	2	15	103.5	14.0027	P3	Underweight	Abnormal	2	15.7	Normal	Normal	2	50	13	0.65	1	#NULL!		#NULL!	0	#NULL!
Umuahia South	1	40	3	2	20	2	2	Trader	Self Employed	3	2	1	1	2	13	89.5	16.2292	P50	Normal	Normal	1	14.8	Normal	Normal	2	48	13	0.65	1	#NULL!		#NULL!	0	#NULL!
Umuahia South	1	43	3	2	10	2	2	Business	Self Employed	3	32	2	2	1	12	78	19.7239	P999	Obese	Abnormal	2	15	Normal	Normal	2	46	15	0.75	2	#NULL!		#NULL!	0	#NULL!
Umuahia South	1	41	3	2	5	1	1	Farmer	Self Employed	3	42	2	2	2	16	75	28.4444	P999	Obese	Abnormal	2	15	Normal	Normal	2	50	9	0.45	1	#NULL!		#NULL!	0	#NULL!
Umuahia South	1	29	2	2	6	1	2	Worker	Employed	2	60	2	2	1	15	99	15.3046	P75	Normal	Normal	1	15	Normal	Normal	2	45	6	0.3	1	#NULL!		#NULL!	0	#NULL!
Umuahia South	1	40	3	2	13	2	2	Trader	Self Employed	3	60	2	1	1	20	100	20	P999	Obese	Abnormal	2	16	Normal	Normal	2	50	10	0.5	1	#NULL!		#NULL!	0	#NULL!
Umuahia South	1	38	3	2	5	1	2	Trader	Self Employed	3	30	2	2	2	12	80	18.75	P99	Obese	Abnormal	2	15	Normal	Normal	2	48	9	0.45	1	#NULL!		#NULL!	0	#NULL!
Umuahia South	1	39	3	2	14	2	3	Unemployed	Unemployed	1	57	2	2	2	16	95	17.7285	P95	Obese	Abnormal	2	15	Normal	Normal	2	50	13	0.65	1	#NULL!		#NULL!	0	#NULL!
Umuahia South	1	36	3	2	7	1	2	Trader	Self Employed	3	48	2	2	2	17	85	23.5294	P999	Obese	Abnormal	2	15	Normal	Normal	2	48	10	0.5	1	#NULL!		#NULL!	0	#NULL!
